# Supplementary material for: Comparative Transcriptome Profiling of Young and Old Brown Adipose Tissue Thermogenesis
Source: Int J Mol Sci. 2021 Dec 5;22(23):13143. doi: 10.3390/ijms222313143 (PMC8658479; doi:10.3390/ijms222313143)
Supplement: Supplementary file 1 [file ijms-22-13143-s001.zip › ijms-1438666-Table S1.xlsx]

## Sheet: Young CE vs Young RT
Gene information			Overall p value	Log2-fold-change	DEG
Symbol	Description	Entrez ID	Young CE/Young RT	Young CE/Young RT	Young CE/Young RT
Gmpr	guanosine monophosphate reductase	66355	7.15702e-05	5.63182	Upregulated
Mfsd2a	major facilitator superfamily domain containing 2A	76574	6.97591e-05	5.22856	Upregulated
Hmox1	heme oxygenase 1	15368	0.000282934	5.09428	Upregulated
Ppargc1a	peroxisome proliferative activated receptor, gamma, coactivator 1 alpha	19017	0.000121111	4.77569	Upregulated
Irs2	insulin receptor substrate 2	384783	0.000343788	4.60457	Upregulated
Cyp2b10	cytochrome P450, family 2, subfamily b, polypeptide 10	13088	0.000636834	4.47096	Upregulated
Cldn1	claudin 1	12737	0.0004551	4.42754	Upregulated
Dio2	deiodinase, iodothyronine, type II	13371	0.00161432	4.23445	Upregulated
Irf4	interferon regulatory factor 4	16364	0.00186596	4.22579	Upregulated
Socs2	suppressor of cytokine signaling 2	216233	0.000958977	3.83665	Upregulated
Sgk2	serum/glucocorticoid regulated kinase 2	27219	0.00120788	3.78342	Upregulated
Tead1	TEA domain family member 1	21676	0.00070818	3.60088	Upregulated
Cdkn1a	cyclin-dependent kinase inhibitor 1A (P21)	12575	0.000798529	3.56843	Upregulated
Peg3	paternally expressed 3	18616	0.00501138	3.5177	Upregulated
Gadd45g	growth arrest and DNA-damage-inducible 45 gamma	23882	0.00240157	3.39733	Upregulated
Slc20a1	solute carrier family 20, member 1	20515	0.00107885	3.36208	Upregulated
Perm1	PPARGC1 and ESRR induced regulator, muscle 1	74183	0.0021826	3.33464	Upregulated
Ttpa	tocopherol (alpha) transfer protein	50500	0.00187001	3.32713	Upregulated
Nnmt	nicotinamide N-methyltransferase	18113	0.0043161	3.24446	Upregulated
Depp1	DEPP1 autophagy regulator	213393	0.00392499	3.17572	Upregulated
Got1	glutamic-oxaloacetic transaminase 1, soluble	14718	0.00174668	3.08947	Upregulated
Mt2	metallothionein 2	17750	0.00486549	3.02344	Upregulated
Slc39a14	solute carrier family 39 (zinc transporter), member 14	213053	0.00344811	3.02245	Upregulated
Sdc4	syndecan 4	20971	0.00170796	2.95572	Upregulated
Slc3a2	solute carrier family 3 (activators of dibasic and neutral amino acid transport), member 2	17254	0.00180096	2.93725	Upregulated
Rbp7	retinol binding protein 7, cellular	63954	0.00178839	2.89845	Upregulated
P4ha1	procollagen-proline, 2-oxoglutarate 4-dioxygenase (proline 4-hydroxylase), alpha 1 polypeptide	18451	0.000848382	2.87064	Upregulated
Dusp1	dual specificity phosphatase 1	19252	0.000958226	2.84078	Upregulated
Slc25a34	solute carrier family 25, member 34	384071	0.00689604	2.83571	Upregulated
Hsph1	heat shock 105kDa/110kDa protein 1	15505	0.00336076	2.81871	Upregulated
Sav1	salvador family WW domain containing 1	64010	0.000532981	2.78782	Upregulated
Lncbate10	brown adipose tissue enriched long noncoding RNA 10	442846	0.00420688	2.76814	Upregulated
Nfil3	nuclear factor, interleukin 3, regulated	18030	0.00516464	2.74242	Upregulated
Lamb3	laminin, beta 3	16780	0.00286882	2.74188	Upregulated
Gm19221	protein phosphatase 2 (formerly 2A), regulatory subunit B (PR 52), alpha isoform pseudogene	100418453	0.00389591	2.69651	Upregulated
Maff	v-maf musculoaponeurotic fibrosarcoma oncogene family, protein F (avian)	17133	0.00543241	2.64244	Upregulated
Pde4d	phosphodiesterase 4D, cAMP specific	238871	0.00253119	2.6243	Upregulated
Lgr6	leucine-rich repeat-containing G protein-coupled receptor 6	329252	0.0154593	2.62323	Upregulated
AW011738	expressed sequence AW011738	100382	0.00767561	2.6121	Upregulated
Cars2	cysteinyl-tRNA synthetase 2 (mitochondrial)(putative)	71941	0.00285806	2.61145	Upregulated
Hsp90aa1	heat shock protein 90, alpha (cytosolic), class A member 1	15519	0.00372941	2.60354	Upregulated
Chst11	carbohydrate sulfotransferase 11	58250	0.00147357	2.59101	Upregulated
Noct	nocturnin	12457	0.00847973	2.58476	Upregulated
Cend1	cell cycle exit and neuronal differentiation 1	57754	0.00365686	2.57597	Upregulated
Gk	glycerol kinase	14933	0.00761162	2.51798	Upregulated
Dhrs9	dehydrogenase/reductase (SDR family) member 9	241452	0.00779614	2.5038	Upregulated
Dusp6	dual specificity phosphatase 6	67603	0.014504	2.49489	Upregulated
Hspa8	heat shock protein 8	15481	0.00091252	2.4647	Upregulated
Sash1	SAM and SH3 domain containing 1	70097	0.00119092	2.40932	Upregulated
Adcy3	adenylate cyclase 3	104111	0.0117952	2.40735	Upregulated
Plekhm2	pleckstrin homology domain containing, family M (with RUN domain) member 2	69582	0.00317139	2.39581	Upregulated
Apold1	apolipoprotein L domain containing 1	381823	0.00747909	2.37561	Upregulated
Ddit4	DNA-damage-inducible transcript 4	74747	0.00509059	2.35218	Upregulated
Adam12	a disintegrin and metallopeptidase domain 12 (meltrin alpha)	11489	0.00394142	2.34996	Upregulated
Sik1	salt inducible kinase 1	17691	0.0120841	2.34888	Upregulated
Jun	jun proto-oncogene	16476	0.0066159	2.33402	Upregulated
Ankrd9	ankyrin repeat domain 9	74251	0.00810211	2.29256	Upregulated
Gabarapl1	gamma-aminobutyric acid (GABA) A receptor-associated protein-like 1	57436	0.00378587	2.27625	Upregulated
Hspa4l	heat shock protein 4 like	18415	0.00423345	2.26595	Upregulated
Chka	choline kinase alpha	12660	0.00476355	2.26508	Upregulated
Gas1	growth arrest specific 1	14451	0.0109957	2.26422	Upregulated
Mt1	metallothionein 1	17748	0.00653246	2.2626	Upregulated
Hspb1	heat shock protein 1	15507	0.00300243	2.25918	Upregulated
Slc7a6	solute carrier family 7 (cationic amino acid transporter, y+ system), member 6	330836	0.00270248	2.25138	Upregulated
Fam117a	family with sequence similarity 117, member A	215512	0.00630533	2.25002	Upregulated
Fkbp5	FK506 binding protein 5	14229	0.00766138	2.24647	Upregulated
Nr4a2	nuclear receptor subfamily 4, group A, member 2	18227	0.0105021	2.23179	Upregulated
Acer2	alkaline ceramidase 2	230379	0.00207047	2.22423	Upregulated
Sgpl1	sphingosine phosphate lyase 1	20397	0.00481858	2.20031	Upregulated
Pdk4	pyruvate dehydrogenase kinase, isoenzyme 4	27273	0.00701344	2.18769	Upregulated
B4galt5	UDP-Gal:betaGlcNAc beta 1,4-galactosyltransferase, polypeptide 5	56336	0.00341057	2.18208	Upregulated
Ankrd33b	ankyrin repeat domain 33B	67434	0.0131746	2.17925	Upregulated
Tmem140	transmembrane protein 140	68487	0.0120737	2.16949	Upregulated
Cblb	Casitas B-lineage lymphoma b	208650	0.00486362	2.16846	Upregulated
Mafb	v-maf musculoaponeurotic fibrosarcoma oncogene family, protein B (avian)	16658	0.0117945	2.15478	Upregulated
Ugp2	UDP-glucose pyrophosphorylase 2	216558	0.0065391	2.14671	Upregulated
Rragd	Ras-related GTP binding D	52187	0.0159078	2.14255	Upregulated
Mapkapk2	MAP kinase-activated protein kinase 2	17164	0.00477075	2.13416	Upregulated
Trp53inp1	transformation related protein 53 inducible nuclear protein 1	60599	0.00932504	2.11294	Upregulated
Cyp4b1	cytochrome P450, family 4, subfamily b, polypeptide 1	13120	0.0190852	2.10938	Upregulated
Errfi1	ERBB receptor feedback inhibitor 1	74155	0.0100051	2.10542	Upregulated
Trib1	tribbles pseudokinase 1	211770	0.0154192	2.10535	Upregulated
Zbtb16	zinc finger and BTB domain containing 16	235320	0.0142711	2.10192	Upregulated
Atf4	activating transcription factor 4	11911	0.00404998	2.09728	Upregulated
Lncbate1	brown adipose tissue enriched long non-coding RNA 1	109215	0.00642695	2.08579	Upregulated
Arntl	aryl hydrocarbon receptor nuclear translocator-like	11865	0.00789524	2.07752	Upregulated
Slc38a2	solute carrier family 38, member 2	67760	0.00901454	2.07721	Upregulated
Myo1b	myosin IB	17912	0.00608876	2.05014	Upregulated
Ctcflos	CCCTC-binding factor (zinc finger protein)-like, opposite strand	74161	0.00792957	2.04723	Upregulated
Tiparp	TCDD-inducible poly(ADP-ribose) polymerase	99929	0.00556226	2.02833	Upregulated
Ranbp9	RAN binding protein 9	56705	0.00164714	2.02748	Upregulated
Slc12a2	solute carrier family 12, member 2	20496	0.0154753	2.00274	Upregulated
Cpeb4	cytoplasmic polyadenylation element binding protein 4	67579	0.00376612	1.99738	Upregulated
Impact	impact, RWD domain protein	16210	0.0090739	1.97379	Upregulated
Lipg	lipase, endothelial	16891	0.0129697	1.95466	Upregulated
Gm826	predicted gene 826	329554	0.00456268	1.95195	Upregulated
Dnajc27	DnaJ heat shock protein family (Hsp40) member C27	217378	0.012593	1.93384	Upregulated
Irak3	interleukin-1 receptor-associated kinase 3	73914	0.00527863	1.92955	Upregulated
Bag3	BCL2-associated athanogene 3	29810	0.00991652	1.92803	Upregulated
Rgs2	regulator of G-protein signaling 2	19735	0.023494	1.91347	Upregulated
Eif1a	eukaryotic translation initiation factor 1A	13664	0.00572879	1.90031	Upregulated
Stard5	StAR-related lipid transfer (START) domain containing 5	170460	0.0119351	1.8996	Upregulated
St3gal5	ST3 beta-galactoside alpha-2,3-sialyltransferase 5	20454	0.0140931	1.89866	Upregulated
Hsp90ab1	heat shock protein 90 alpha (cytosolic), class B member 1	15516	0.0100789	1.88755	Upregulated
Pde7b	phosphodiesterase 7B	29863	0.0152148	1.86251	Upregulated
Fst	follistatin	14313	0.0133708	1.85791	Upregulated
Lyve1	lymphatic vessel endothelial hyaluronan receptor 1	114332	0.0174789	1.85584	Upregulated
Zfp52	zinc finger protein 52	22710	0.0111229	1.85553	Upregulated
Ccl9	chemokine (C-C motif) ligand 9	20308	0.0299908	1.85319	Upregulated
Dnajb9	DnaJ heat shock protein family (Hsp40) member B9	27362	0.0134931	1.83209	Upregulated
Slc36a1	solute carrier family 36 (proton/amino acid symporter), member 1	215335	0.0125205	1.82277	Upregulated
Chd1	chromodomain helicase DNA binding protein 1	12648	0.00684751	1.81723	Upregulated
Frrs1	ferric-chelate reductase 1	20321	0.0119853	1.80383	Upregulated
Tpcn2	two pore segment channel 2	233979	0.00773076	1.80173	Upregulated
Sgk1	serum/glucocorticoid regulated kinase 1	20393	0.0194716	1.80029	Upregulated
Cnnm2	cyclin M2	94219	0.0135236	1.7986	Upregulated
Thbs1	thrombospondin 1	21825	0.0153349	1.79477	Upregulated
Sat1	spermidine/spermine N1-acetyl transferase 1	20229	0.0136301	1.78754	Upregulated
Atp6v1h	ATPase, H+ transporting, lysosomal V1 subunit H	108664	0.00515678	1.78086	Upregulated
Dnajb1	DnaJ heat shock protein family (Hsp40) member B1	81489	0.0177037	1.77907	Upregulated
Ahsa1	AHA1, activator of heat shock protein ATPase 1	217737	0.00683024	1.77374	Upregulated
Gnl3	guanine nucleotide binding protein-like 3 (nucleolar)	30877	0.00969346	1.77075	Upregulated
Speg	SPEG complex locus	11790	0.0245946	1.74726	Upregulated
Ccn1	cellular communication network factor 1	16007	0.0183929	1.74673	Upregulated
Fosl2	fos-like antigen 2	14284	0.0134638	1.74403	Upregulated
Tinagl1	tubulointerstitial nephritis antigen-like 1	94242	0.016647	1.7298	Upregulated
Kcnk3	potassium channel, subfamily K, member 3	16527	0.00750594	1.71877	Upregulated
Sgms1	sphingomyelin synthase 1	208449	0.00895042	1.71731	Upregulated
Ccl6	chemokine (C-C motif) ligand 6	20305	0.0268945	1.70807	Upregulated
Hccs	holocytochrome c synthetase	15159	0.00481066	1.70628	Upregulated
Lamb1	laminin B1	16777	0.014896	1.70027	Upregulated
Rpph1	ribonuclease P RNA component H1	85029	0.0355985	1.69875	Upregulated
Litaf	LPS-induced TN factor	56722	0.0173344	1.69676	Upregulated
Sesn2	sestrin 2	230784	0.0167282	1.69645	Upregulated
Pnrc1	proline-rich nuclear receptor coactivator 1	108767	0.0125854	1.6953	Upregulated
Cth	cystathionase (cystathionine gamma-lyase)	107869	0.0219836	1.6907	Upregulated
Resf1	retroelement silencing factor 1	67246	0.032245	1.68687	Upregulated
Lvrn	laeverin	74574	0.0211758	1.6868	Upregulated
Ppp1r15a	protein phosphatase 1, regulatory subunit 15A	17872	0.020798	1.68544	Upregulated
Rusc2	RUN and SH3 domain containing 2	100213	0.0178577	1.68417	Upregulated
Ttll7	tubulin tyrosine ligase-like family, member 7	70892	0.0277808	1.68294	Upregulated
Irak2	interleukin-1 receptor-associated kinase 2	108960	0.0155293	1.66651	Upregulated
Snta1	syntrophin, acidic 1	20648	0.0207213	1.6531	Upregulated
Ffar4	free fatty acid receptor 4	107221	0.0275454	1.65129	Upregulated
Per1	period circadian clock 1	18626	0.0214275	1.63575	Upregulated
Atg101	autophagy related 101	68118	0.0125077	1.63157	Upregulated
Adrb2	adrenergic receptor, beta 2	11555	0.0182615	1.61743	Upregulated
Atg13	autophagy related 13	51897	0.00452731	1.61629	Upregulated
Ucp1	uncoupling protein 1 (mitochondrial, proton carrier)	22227	0.0156164	1.59295	Upregulated
Snrk	SNF related kinase	20623	0.0149709	1.57244	Upregulated
Tnfrsf1a	tumor necrosis factor receptor superfamily, member 1a	21937	0.0135967	1.57183	Upregulated
Pfkp	phosphofructokinase, platelet	56421	0.00517709	1.57181	Upregulated
Csrnp1	cysteine-serine-rich nuclear protein 1	215418	0.0206998	1.56697	Upregulated
Tmx4	thioredoxin-related transmembrane protein 4	52837	0.0134778	1.54933	Upregulated
Foxn2	forkhead box N2	14236	0.0183253	1.54853	Upregulated
Taf7	TATA-box binding protein associated factor 7	24074	0.0152531	1.54203	Upregulated
Cldn5	claudin 5	12741	0.0266086	1.53163	Upregulated
Hdc	histidine decarboxylase	15186	0.0280523	1.53088	Upregulated
Asl	argininosuccinate lyase	109900	0.0292287	1.5157	Upregulated
Wdr73	WD repeat domain 73	71968	0.0183766	1.51544	Upregulated
Usp33	ubiquitin specific peptidase 33	170822	0.0214166	1.51293	Upregulated
Ipmk	inositol polyphosphate multikinase	69718	0.0172925	1.51205	Upregulated
Ctla2a	cytotoxic T lymphocyte-associated protein 2 alpha	13024	0.0110388	1.51014	Upregulated
Zfp655	zinc finger protein 655	72611	0.0102046	1.5096	Upregulated
Slc43a2	solute carrier family 43, member 2	215113	0.0219177	1.50768	Upregulated
Adnp2	ADNP homeobox 2	240442	0.0105973	1.50683	Upregulated
Dnaja1	DnaJ heat shock protein family (Hsp40) member A1	15502	0.0159929	1.50509	Upregulated
Ccnl1	cyclin L1	56706	0.00858285	1.50431	Upregulated
F2r	coagulation factor II (thrombin) receptor	14062	0.0335119	1.5038	Upregulated
Atp1a1	ATPase, Na+/K+ transporting, alpha 1 polypeptide	11928	0.0281042	1.49964	Upregulated
Kalrn	kalirin, RhoGEF kinase	545156	0.0228145	1.49366	Upregulated
Apmap	adipocyte plasma membrane associated protein	71881	0.00839311	1.48416	Upregulated
Flcn	folliculin	216805	0.0175225	1.48234	Upregulated
Txnip	thioredoxin interacting protein	56338	0.0332197	1.47521	Upregulated
Ckb	creatine kinase, brain	12709	0.0398863	1.47101	Upregulated
Ifrd1	interferon-related developmental regulator 1	15982	0.0267094	1.47011	Upregulated
Syn2	synapsin II	20965	0.029407	1.47008	Upregulated
Anxa3	annexin A3	11745	0.0136935	1.46793	Upregulated
Cntfr	ciliary neurotrophic factor receptor	12804	0.0290118	1.4665	Upregulated
Hacd2	3-hydroxyacyl-CoA dehydratase 2	70757	0.0116242	1.46482	Upregulated
Fbf1	Fas (TNFRSF6) binding factor 1	217335	0.0143349	1.4632	Upregulated
Igfbp3	insulin-like growth factor binding protein 3	16009	0.017646	1.45554	Upregulated
Hspb8	heat shock protein 8	80888	0.0213771	1.45208	Upregulated
Ctsz	cathepsin Z	64138	0.0272266	1.45009	Upregulated
Zbtb38	zinc finger and BTB domain containing 38	245007	0.0200238	1.44958	Upregulated
Slc25a25	solute carrier family 25 (mitochondrial carrier, phosphate carrier), member 25	227731	0.0177707	1.44655	Upregulated
Lpl	lipoprotein lipase	16956	0.0150743	1.44537	Upregulated
Tbc1d9	TBC1 domain family, member 9	71310	0.0214528	1.44248	Upregulated
Zfp770	zinc finger protein 770	228491	0.014573	1.4404	Upregulated
Sacm1l	SAC1 suppressor of actin mutations 1-like (yeast)	83493	0.0117503	1.44028	Upregulated
Cdc27	cell division cycle 27	217232	0.0175399	1.43984	Upregulated
Slc2a1	solute carrier family 2 (facilitated glucose transporter), member 1	20525	0.0190765	1.43691	Upregulated
Sqstm1	sequestosome 1	18412	0.0178863	1.43681	Upregulated
Mob1b	MOB kinase activator 1B	68473	0.0206215	1.43638	Upregulated
Pxdc1	PX domain containing 1	66895	0.00735481	1.42654	Upregulated
Sox17	SRY (sex determining region Y)-box 17	20671	0.0266449	1.42468	Upregulated
Lrrc20	leucine rich repeat containing 20	216011	0.0200755	1.42273	Upregulated
Atp1b1	ATPase, Na+/K+ transporting, beta 1 polypeptide	11931	0.0224648	1.41785	Upregulated
Mga	MAX gene associated	29808	0.0173528	1.41469	Upregulated
Lncpint	long non-protein coding RNA, Trp53 induced transcript	232685	0.0323319	1.41387	Upregulated
Tbc1d20	TBC1 domain family, member 20	67231	0.0191352	1.41253	Upregulated
Ackr3	atypical chemokine receptor 3	12778	0.0319218	1.40682	Upregulated
Fnip1	folliculin interacting protein 1	216742	0.0161441	1.40483	Upregulated
Nedd9	neural precursor cell expressed, developmentally down-regulated gene 9	18003	0.00995268	1.40151	Upregulated
Shb	src homology 2 domain-containing transforming protein B	230126	0.0192507	1.39932	Upregulated
Fabp3	fatty acid binding protein 3, muscle and heart	14077	0.0329093	1.3976	Upregulated
Slc27a2	solute carrier family 27 (fatty acid transporter), member 2	26458	0.0449206	1.39635	Upregulated
Rabgef1	RAB guanine nucleotide exchange factor (GEF) 1	56715	0.0146513	1.39367	Upregulated
Ercc1	excision repair cross-complementing rodent repair deficiency, complementation group 1	13870	0.00777492	1.39123	Upregulated
Cebpd	CCAAT/enhancer binding protein (C/EBP), delta	12609	0.0273826	1.38908	Upregulated
Ctcfl	CCCTC-binding factor (zinc finger protein)-like	664799	0.0260251	1.38737	Upregulated
Gm30173	predicted gene, 30173	102631981	0.0303075	1.38639	Upregulated
Snx21	sorting nexin family member 21	101113	0.0300573	1.38572	Upregulated
Crem	cAMP responsive element modulator	12916	0.0247615	1.37771	Upregulated
Foxo1	forkhead box O1	56458	0.0226538	1.37541	Upregulated
Lcmt2	leucine carboxyl methyltransferase 2	329504	0.0273845	1.37134	Upregulated
Rrp12	ribosomal RNA processing 12 homolog (S. cerevisiae)	107094	0.0244476	1.36764	Upregulated
Zmiz1	zinc finger, MIZ-type containing 1	328365	0.0303675	1.36689	Upregulated
Dusp16	dual specificity phosphatase 16	70686	0.0236233	1.35734	Upregulated
Col4a1	collagen, type IV, alpha 1	12826	0.0330721	1.35082	Upregulated
Elovl3	elongation of very long chain fatty acids (FEN1/Elo2, SUR4/Elo3, yeast)-like 3	12686	0.0340009	1.34995	Upregulated
Pmp22	peripheral myelin protein 22	18858	0.0264448	1.34684	Upregulated
Rdh13	retinol dehydrogenase 13 (all-trans and 9-cis)	108841	0.0161618	1.34592	Upregulated
Man2a1	mannosidase 2, alpha 1	17158	0.013665	1.33852	Upregulated
Gpam	glycerol-3-phosphate acyltransferase, mitochondrial	14732	0.0232145	1.33767	Upregulated
Smcr8	Smith-Magenis syndrome chromosome region, candidate 8 homolog (human)	237782	0.0187278	1.33595	Upregulated
Gdap2	ganglioside-induced differentiation-associated-protein 2	14547	0.0219821	1.33509	Upregulated
Arhgef12	Rho guanine nucleotide exchange factor (GEF) 12	69632	0.0184767	1.33213	Upregulated
Sik3	SIK family kinase 3	70661	0.0343332	1.32869	Upregulated
Atp10d	ATPase, class V, type 10D	231287	0.0387305	1.32833	Upregulated
Chordc1	cysteine and histidine-rich domain (CHORD)-containing, zinc-binding protein 1	66917	0.0210861	1.32448	Upregulated
Galnt15	polypeptide N-acetylgalactosaminyltransferase 15	78754	0.0355369	1.32385	Upregulated
Clstn3	calsyntenin 3	232370	0.0264711	1.32223	Upregulated
Pip5k1a	phosphatidylinositol-4-phosphate 5-kinase, type 1 alpha	18720	0.0216425	1.32113	Upregulated
Adamts1	a disintegrin-like and metallopeptidase (reprolysin type) with thrombospondin type 1 motif, 1	11504	0.033215	1.32104	Upregulated
Plekhg1	pleckstrin homology domain containing, family G (with RhoGef domain) member 1	213783	0.022064	1.32101	Upregulated
Stam	signal transducing adaptor molecule (SH3 domain and ITAM motif) 1	20844	0.0182254	1.31642	Upregulated
Akap12	A kinase (PRKA) anchor protein (gravin) 12	83397	0.0362761	1.31529	Upregulated
Atf6	activating transcription factor 6	226641	0.0147658	1.3134	Upregulated
Klf4	Kruppel-like factor 4 (gut)	16600	0.0326485	1.31298	Upregulated
Zfhx3	zinc finger homeobox 3	11906	0.0347833	1.31238	Upregulated
Ubc	ubiquitin C	22190	0.0444619	1.30929	Upregulated
Ranbp2	RAN binding protein 2	19386	0.0115466	1.30467	Upregulated
Dedd2	death effector domain-containing DNA binding protein 2	67379	0.0174237	1.30103	Upregulated
Cdo1	cysteine dioxygenase 1, cytosolic	12583	0.0119868	1.298	Upregulated
Rgcc	regulator of cell cycle	66214	0.0294423	1.29646	Upregulated
Sec24a	Sec24 related gene family, member A (S. cerevisiae)	77371	0.0270266	1.29456	Upregulated
Mbnl2	muscleblind like splicing factor 2	105559	0.0127335	1.29183	Upregulated
Cdv3	carnitine deficiency-associated gene expressed in ventricle 3	321022	0.0104497	1.28389	Upregulated
Etf1	eukaryotic translation termination factor 1	225363	0.0185702	1.28287	Upregulated
Pvr	poliovirus receptor	52118	0.0197937	1.28201	Upregulated
Usp54	ubiquitin specific peptidase 54	78787	0.0345961	1.28109	Upregulated
Pak1ip1	PAK1 interacting protein 1	68083	0.00844439	1.28073	Upregulated
Ttc1	tetratricopeptide repeat domain 1	66827	0.0226426	1.27252	Upregulated
Lifr	LIF receptor alpha	16880	0.0194903	1.27167	Upregulated
Fbxo34	F-box protein 34	78938	0.0319551	1.26447	Upregulated
Ubxn4	UBX domain protein 4	67812	0.0238204	1.26259	Upregulated
Tbc1d15	TBC1 domain family, member 15	66687	0.0266003	1.2611	Upregulated
Mylk	myosin, light polypeptide kinase	107589	0.0342591	1.25975	Upregulated
Sar1b	secretion associated Ras related GTPase 1B	66397	0.0130699	1.25967	Upregulated
Morf4l2	mortality factor 4 like 2	56397	0.0273189	1.25594	Upregulated
Them4	thioesterase superfamily member 4	75778	0.0251809	1.25475	Upregulated
Ppp2r2d	protein phosphatase 2, regulatory subunit B, delta	52432	0.0309965	1.25337	Upregulated
Larp4	La ribonucleoprotein domain family, member 4	207214	0.011521	1.25264	Upregulated
Aste1	asteroid homolog 1	66595	0.0230544	1.25134	Upregulated
Tbcel	tubulin folding cofactor E-like	272589	0.0342329	1.25094	Upregulated
Klf15	Kruppel-like factor 15	66277	0.0398184	1.25072	Upregulated
Mafk	v-maf musculoaponeurotic fibrosarcoma oncogene family, protein K (avian)	17135	0.0380218	1.24986	Upregulated
Arl4a	ADP-ribosylation factor-like 4A	11861	0.0215673	1.24956	Upregulated
Fam126b	family with sequence similarity 126, member B	213056	0.0177259	1.24734	Upregulated
Rabggtb	Rab geranylgeranyl transferase, b subunit	19352	0.0169934	1.24663	Upregulated
Fam160a1	family with sequence similarity 160, member A1	229488	0.0397009	1.24296	Upregulated
Zfp691	zinc finger protein 691	195522	0.0279027	1.24291	Upregulated
Pdp2	pyruvate dehyrogenase phosphatase catalytic subunit 2	382051	0.0298768	1.24201	Upregulated
Map3k8	mitogen-activated protein kinase kinase kinase 8	26410	0.0398065	1.22463	Upregulated
Trpc1	transient receptor potential cation channel, subfamily C, member 1	22063	0.0330554	1.22381	Upregulated
Col7a1	collagen, type VII, alpha 1	12836	0.0337246	1.22144	Upregulated
Lamp2	lysosomal-associated membrane protein 2	16784	0.0117408	1.21879	Upregulated
Eprs	glutamyl-prolyl-tRNA synthetase	107508	0.0235936	1.2182	Upregulated
Ptpn23	protein tyrosine phosphatase, non-receptor type 23	104831	0.0362949	1.21705	Upregulated
Supt6	SPT6, histone chaperone and transcription elongation factor	20926	0.0336682	1.21569	Upregulated
2410006H16Rik	RIKEN cDNA 2410006H16 gene	69221	0.0193449	1.21536	Upregulated
Gpihbp1	GPI-anchored HDL-binding protein 1	68453	0.0299833	1.21134	Upregulated
Gab2	growth factor receptor bound protein 2-associated protein 2	14389	0.0168541	1.21077	Upregulated
Ddx21	DExD box helicase 21	56200	0.0391849	1.20961	Upregulated
Elmod2	ELMO/CED-12 domain containing 2	244548	0.0279187	1.20898	Upregulated
Slc19a2	solute carrier family 19 (thiamine transporter), member 2	116914	0.0225432	1.20694	Upregulated
Pld1	phospholipase D1	18805	0.0362802	1.20677	Upregulated
Lnx1	ligand of numb-protein X 1	16924	0.0455797	1.20665	Upregulated
Sars	seryl-aminoacyl-tRNA synthetase	20226	0.0196458	1.20572	Upregulated
Ung	uracil DNA glycosylase	22256	0.036184	1.20564	Upregulated
Map2k3os	mitogen-activated protein kinase kinase 3, opposite strand	24082	0.0399238	1.20103	Upregulated
Pappa	pregnancy-associated plasma protein A	18491	0.0498912	1.19985	Upregulated
Dnaja4	DnaJ heat shock protein family (Hsp40) member A4	58233	0.0485451	1.19981	Upregulated
Slc25a17	solute carrier family 25 (mitochondrial carrier, peroxisomal membrane protein), member 17	20524	0.0104193	1.19957	Upregulated
Myrip	myosin VIIA and Rab interacting protein	245049	0.0452484	1.19665	Upregulated
Hmox2	heme oxygenase 2	15369	0.0353236	1.19525	Upregulated
Pkig	protein kinase inhibitor, gamma	18769	0.0427256	1.1932	Upregulated
Nrbf2	nuclear receptor binding factor 2	641340	0.0347494	1.18669	Upregulated
Psma1	proteasome subunit alpha 1	26440	0.0114565	1.18641	Upregulated
Pla1a	phospholipase A1 member A	85031	0.0303093	1.18473	Upregulated
Cystm1	cysteine-rich transmembrane module containing 1	66060	0.0406508	1.18332	Upregulated
S1pr1	sphingosine-1-phosphate receptor 1	13609	0.0414174	1.1827	Upregulated
Irf2bp2	interferon regulatory factor 2 binding protein 2	270110	0.0446685	1.18193	Upregulated
Cct3	chaperonin containing Tcp1, subunit 3 (gamma)	12462	0.0187927	1.1772	Upregulated
Smim13	small integral membrane protein 13	108934	0.0258448	1.17676	Upregulated
Hspe1	heat shock protein 1 (chaperonin 10)	15528	0.0222415	1.17665	Upregulated
Zfp346	zinc finger protein 346	26919	0.0406987	1.16917	Upregulated
Atl2	atlastin GTPase 2	56298	0.0489414	1.16847	Upregulated
Utp14a	UTP14A small subunit processome component	72554	0.029325	1.16547	Upregulated
Mbd1	methyl-CpG binding domain protein 1	17190	0.0214614	1.16542	Upregulated
Klf9	Kruppel-like factor 9	16601	0.0122427	1.1605	Upregulated
Mafg	v-maf musculoaponeurotic fibrosarcoma oncogene family, protein G (avian)	17134	0.0362053	1.15965	Upregulated
Dlg1	discs large MAGUK scaffold protein 1	13383	0.0296731	1.15958	Upregulated
Eif1	eukaryotic translation initiation factor 1	20918	0.0279537	1.15931	Upregulated
Tpm4	tropomyosin 4	326618	0.0246488	1.15825	Upregulated
Fam117b	family with sequence similarity 117, member B	72750	0.0298361	1.15628	Upregulated
Diaph1	diaphanous related formin 1	13367	0.0459554	1.15064	Upregulated
Dcun1d5	DCN1, defective in cullin neddylation 1, domain containing 5 (S. cerevisiae)	76863	0.0251281	1.14812	Upregulated
Sugt1	SGT1, suppressor of G2 allele of SKP1 (S. cerevisiae)	67955	0.020995	1.14771	Upregulated
Nol8	nucleolar protein 8	70930	0.0360444	1.14599	Upregulated
Nfkbib	nuclear factor of kappa light polypeptide gene enhancer in B cells inhibitor, beta	18036	0.046829	1.14343	Upregulated
Rb1cc1	RB1-inducible coiled-coil 1	12421	0.0160844	1.14296	Upregulated
Vegfa	vascular endothelial growth factor A	22339	0.0324374	1.14193	Upregulated
Pde4c	phosphodiesterase 4C, cAMP specific	110385	0.0445955	1.1408	Upregulated
Naa50	N(alpha)-acetyltransferase 50, NatE catalytic subunit	72117	0.0368985	1.13615	Upregulated
Nfkbia	nuclear factor of kappa light polypeptide gene enhancer in B cells inhibitor, alpha	18035	0.0420884	1.13547	Upregulated
Nars	asparaginyl-tRNA synthetase	70223	0.0230843	1.12921	Upregulated
Aff4	AF4/FMR2 family, member 4	93736	0.0124588	1.12763	Upregulated
Supt5	suppressor of Ty 5, DSIF elongation factor subunit	20924	0.049636	1.12684	Upregulated
Slc41a2	solute carrier family 41, member 2	338365	0.0322543	1.12575	Upregulated
Ltv1	LTV1 ribosome biogenesis factor	353258	0.035292	1.12368	Upregulated
Picalm	phosphatidylinositol binding clathrin assembly protein	233489	0.0226179	1.12365	Upregulated
Gcnt2	glucosaminyl (N-acetyl) transferase 2, I-branching enzyme	14538	0.0341401	1.1234	Upregulated
Etv3	ets variant 3	27049	0.0196876	1.12317	Upregulated
Tmed5	transmembrane p24 trafficking protein 5	73130	0.0281541	1.1203	Upregulated
Map1b	microtubule-associated protein 1B	17755	0.034982	1.11845	Upregulated
Rnf4	ring finger protein 4	19822	0.0239998	1.11637	Upregulated
Tex2	testis expressed gene 2	21763	0.039054	1.11524	Upregulated
Sun2	Sad1 and UNC84 domain containing 2	223697	0.0376287	1.11511	Upregulated
Cebpz	CCAAT/enhancer binding protein zeta	12607	0.0351507	1.11496	Upregulated
Klhl24	kelch-like 24	75785	0.0408917	1.11401	Upregulated
Phospho2	phosphatase, orphan 2	73373	0.0387302	1.11351	Upregulated
Acot4	acyl-CoA thioesterase 4	171282	0.0477244	1.11299	Upregulated
Eif2b3	eukaryotic translation initiation factor 2B, subunit 3	108067	0.0267287	1.11216	Upregulated
Macroh2a2	macroH2A.2 histone	404634	0.0390146	1.11057	Upregulated
Srxn1	sulfiredoxin 1 homolog (S. cerevisiae)	76650	0.0173351	1.1101	Upregulated
Plin4	perilipin 4	57435	0.0283785	1.10524	Upregulated
Ell2	elongation factor for RNA polymerase II 2	192657	0.0188486	1.10146	Upregulated
Ipo7	importin 7	233726	0.0122119	1.09686	Upregulated
Psmd11	proteasome (prosome, macropain) 26S subunit, non-ATPase, 11	69077	0.0243992	1.09503	Upregulated
Stip1	stress-induced phosphoprotein 1	20867	0.0311311	1.09269	Upregulated
Golga4	golgi autoantigen, golgin subfamily a, 4	54214	0.0348034	1.09172	Upregulated
Rnf185	ring finger protein 185	193670	0.033652	1.09119	Upregulated
Mlycd	malonyl-CoA decarboxylase	56690	0.031967	1.08883	Upregulated
Car13	carbonic anhydrase 13	71934	0.0215045	1.08752	Upregulated
Jmy	junction-mediating and regulatory protein	57748	0.0264988	1.0875	Upregulated
Tceal9	transcription elongation factor A like 9	22381	0.0472277	1.08684	Upregulated
Cav1	caveolin 1, caveolae protein	12389	0.0224529	1.08668	Upregulated
Mat2a	methionine adenosyltransferase II, alpha	232087	0.0369818	1.08655	Upregulated
Rbm47	RNA binding motif protein 47	245945	0.0341066	1.08654	Upregulated
Ppif	peptidylprolyl isomerase F (cyclophilin F)	105675	0.0328329	1.08628	Upregulated
Gla	galactosidase, alpha	11605	0.0495009	1.08585	Upregulated
Nop2	NOP2 nucleolar protein	110109	0.0308592	1.08435	Upregulated
G3bp2	GTPase activating protein (SH3 domain) binding protein 2	23881	0.0304621	1.08432	Upregulated
Washc5	WASH complex subunit 5	223593	0.0236594	1.08126	Upregulated
Ptar1	protein prenyltransferase alpha subunit repeat containing 1	72351	0.0298865	1.08121	Upregulated
Hpdl	4-hydroxyphenylpyruvate dioxygenase-like	242642	0.0482729	1.08068	Upregulated
Hectd1	HECT domain E3 ubiquitin protein ligase 1	207304	0.0228878	1.07955	Upregulated
Fbxo28	F-box protein 28	67948	0.0370431	1.07868	Upregulated
Atp6v1e1	ATPase, H+ transporting, lysosomal V1 subunit E1	11973	0.00900408	1.07845	Upregulated
Ctns	cystinosis, nephropathic	83429	0.0282805	1.07843	Upregulated
Nfx1	nuclear transcription factor, X-box binding 1	74164	0.0339081	1.07456	Upregulated
Nploc4	NPL4 homolog, ubiquitin recognition factor	217365	0.0381178	1.0745	Upregulated
Scarb2	scavenger receptor class B, member 2	12492	0.0222	1.07387	Upregulated
Rrm1	ribonucleotide reductase M1	20133	0.0279195	1.07154	Upregulated
Pdpk1	3-phosphoinositide dependent protein kinase 1	18607	0.022914	1.0704	Upregulated
Api5	apoptosis inhibitor 5	11800	0.0257981	1.06979	Upregulated
Plekhm3	pleckstrin homology domain containing, family M, member 3	241075	0.0353827	1.0676	Upregulated
Ppp2ca	protein phosphatase 2 (formerly 2A), catalytic subunit, alpha isoform	19052	0.0144331	1.06643	Upregulated
Atf5	activating transcription factor 5	107503	0.0468668	1.06535	Upregulated
Spring1	SREBF pathway regulator in golgi 1	76792	0.0292639	1.06398	Upregulated
Tbk1	TANK-binding kinase 1	56480	0.0341453	1.0634	Upregulated
Acot6	acyl-CoA thioesterase 6	217700	0.0374094	1.06134	Upregulated
Nsmce2	NSE2/MMS21 homolog, SMC5-SMC6 complex SUMO ligase	68501	0.0492178	1.06082	Upregulated
Eya3	EYA transcriptional coactivator and phosphatase 3	14050	0.0249767	1.06072	Upregulated
Chkb	choline kinase beta	12651	0.0479489	1.05977	Upregulated
Lamtor3	late endosomal/lysosomal adaptor, MAPK and MTOR activator 3	56692	0.0231357	1.05827	Upregulated
Npm1	nucleophosmin 1	18148	0.0406888	1.05804	Upregulated
Ube2b	ubiquitin-conjugating enzyme E2B	22210	0.0196056	1.05774	Upregulated
Wdr81	WD repeat domain 81	192652	0.0331834	1.05726	Upregulated
Mybbp1a	MYB binding protein (P160) 1a	18432	0.045866	1.05575	Upregulated
Rragc	Ras-related GTP binding C	54170	0.00852963	1.04855	Upregulated
Ist1	increased sodium tolerance 1 homolog (yeast)	71955	0.0437902	1.04551	Upregulated
Kctd9	potassium channel tetramerisation domain containing 9	105440	0.0400265	1.04524	Upregulated
Aggf1	angiogenic factor with G patch and FHA domains 1	66549	0.0329711	1.04435	Upregulated
Ints10	integrator complex subunit 10	70885	0.0470684	1.03737	Upregulated
Socs4	suppressor of cytokine signaling 4	67296	0.0398472	1.03648	Upregulated
Akap11	A kinase (PRKA) anchor protein 11	219181	0.0495101	1.03343	Upregulated
Tlk2	tousled-like kinase 2 (Arabidopsis)	24086	0.0256728	1.03307	Upregulated
Ptges3	prostaglandin E synthase 3	56351	0.0338246	1.03282	Upregulated
Dnaja2	DnaJ heat shock protein family (Hsp40) member A2	56445	0.0211458	1.02847	Upregulated
Zwint	ZW10 interactor	52696	0.031905	1.02549	Upregulated
Usp16	ubiquitin specific peptidase 16	74112	0.049326	1.02159	Upregulated
D230025D16Rik	RIKEN cDNA D230025D16 gene	234678	0.0408464	1.02065	Upregulated
Asb1	ankyrin repeat and SOCS box-containing 1	65247	0.0338531	1.02042	Upregulated
Tbc1d23	TBC1 domain family, member 23	67581	0.032326	1.01935	Upregulated
Pla2g12a	phospholipase A2, group XIIA	66350	0.0168557	1.01843	Upregulated
Sptan1	spectrin alpha, non-erythrocytic 1	20740	0.0314852	1.0176	Upregulated
Naa20	N(alpha)-acetyltransferase 20, NatB catalytic subunit	67877	0.0229507	1.01732	Upregulated
Snhg1	small nucleolar RNA host gene 1	83673	0.0339768	1.01706	Upregulated
Baz1a	bromodomain adjacent to zinc finger domain 1A	217578	0.039656	1.01589	Upregulated
Usp31	ubiquitin specific peptidase 31	76179	0.0378548	1.01369	Upregulated
Elavl1	ELAV (embryonic lethal, abnormal vision)-like 1 (Hu antigen R)	15568	0.0349855	1.01077	Upregulated
Sprtn	SprT-like N-terminal domain	244666	0.044203	1.01034	Upregulated
Mospd1	motile sperm domain containing 1	70380	0.0458148	1.01	Upregulated
Trim32	tripartite motif-containing 32	69807	0.0451139	1.00693	Upregulated
Tmem33	transmembrane protein 33	67878	0.0369708	1.00684	Upregulated
Rnf6	ring finger protein (C3H2C3 type) 6	74132	0.0266681	1.00545	Upregulated
Trim24	tripartite motif-containing 24	21848	0.0415638	1.00452	Upregulated
Rnmt	RNA (guanine-7-) methyltransferase	67897	0.0448495	1.00428	Upregulated
Fam214a	family with sequence similarity 214, member A	235493	0.0368391	1.00352	Upregulated
Golph3	golgi phosphoprotein 3	66629	0.02478	1.00269	Upregulated
Zfp672	zinc finger protein 672	319475	0.0304809	1.0006	Upregulated
Ube2g2	ubiquitin-conjugating enzyme E2G 2	22213	0.0307083	0.999622	Upregulated
Rpp38	ribonuclease P/MRP 38 subunit	227522	0.0496916	0.99582	Upregulated
Timm10	translocase of inner mitochondrial membrane 10	30059	0.0372055	0.995125	Upregulated
Zfp639	zinc finger protein 639	67778	0.028406	0.993475	Upregulated
Ppp1r8	protein phosphatase 1, regulatory subunit 8	100336	0.0265524	0.993231	Upregulated
Ctr9	CTR9 homolog, Paf1/RNA polymerase II complex component	22083	0.0404033	0.992002	Upregulated
Sf1	splicing factor 1	22668	0.0368726	0.99046	Upregulated
Lysmd3	LysM, putative peptidoglycan-binding, domain containing 3	80289	0.0393363	0.987978	Upregulated
Pank1	pantothenate kinase 1	75735	0.0319201	0.987765	Upregulated
Fbxo44	F-box protein 44	230903	0.0484039	0.987741	Upregulated
Tatdn2	TatD DNase domain containing 2	381801	0.0497374	0.985476	Upregulated
Lrrc58	leucine rich repeat containing 58	320184	0.0141229	0.983459	Upregulated
Med1	mediator complex subunit 1	19014	0.0458319	0.979671	Upregulated
Phf5a	PHD finger protein 5A	68479	0.0408762	0.969945	Upregulated
Nifk	nucleolar protein interacting with the FHA domain of MKI67	67949	0.035269	0.969296	Upregulated
Psmc2	proteasome (prosome, macropain) 26S subunit, ATPase 2	19181	0.0423709	0.967828	Upregulated
Lrrfip2	leucine rich repeat (in FLII) interacting protein 2	71268	0.0369647	0.966101	Upregulated
Adam17	a disintegrin and metallopeptidase domain 17	11491	0.0376265	0.965969	Upregulated
Arfgef2	ADP-ribosylation factor guanine nucleotide-exchange factor 2 (brefeldin A-inhibited)	99371	0.0460896	0.963674	Upregulated
Tollip	toll interacting protein	54473	0.0333444	0.963393	Upregulated
Klhl5	kelch-like 5	71778	0.0473513	-0.96822	Downregulated
Msh6	mutS homolog 6	17688	0.048332	-0.968433	Downregulated
Mfsd3	major facilitator superfamily domain containing 3	69572	0.0398486	-0.973253	Downregulated
Plcb3	phospholipase C, beta 3	18797	0.0407228	-0.973462	Downregulated
Cbx5	chromobox 5	12419	0.029439	-0.975605	Downregulated
Xylt2	xylosyltransferase II	217119	0.0454151	-0.977038	Downregulated
Mettl7a1	methyltransferase like 7A1	70152	0.0497707	-0.989245	Downregulated
Pcyox1	prenylcysteine oxidase 1	66881	0.0434858	-0.990414	Downregulated
1600014C10Rik	RIKEN cDNA 1600014C10 gene	72244	0.037168	-0.992277	Downregulated
Mdfic	MyoD family inhibitor domain containing	16543	0.0490668	-0.996354	Downregulated
Akt2	thymoma viral proto-oncogene 2	11652	0.0384934	-1.00075	Downregulated
Tbc1d32	TBC1 domain family, member 32	544696	0.0369786	-1.00487	Downregulated
Neil1	nei endonuclease VIII-like 1 (E. coli)	72774	0.0497975	-1.01266	Downregulated
Ebf2	early B cell factor 2	13592	0.0406606	-1.02116	Downregulated
H2bc21	H2B clustered histone 21	319190	0.0375181	-1.02199	Downregulated
Arhgap18	Rho GTPase activating protein 18	73910	0.0335333	-1.03757	Downregulated
Sema6a	sema domain, transmembrane domain (TM), and cytoplasmic domain, (semaphorin) 6A	20358	0.0499175	-1.04362	Downregulated
Cep78	centrosomal protein 78	208518	0.0410502	-1.04791	Downregulated
Msh3	mutS homolog 3	17686	0.0492455	-1.05053	Downregulated
Tlcd1	TLC domain containing 1	68385	0.0420582	-1.05633	Downregulated
Ank	progressive ankylosis	11732	0.049337	-1.06039	Downregulated
S1pr3	sphingosine-1-phosphate receptor 3	13610	0.0447761	-1.06213	Downregulated
Mamld1	mastermind-like domain containing 1	333639	0.0443423	-1.06258	Downregulated
Pdia4	protein disulfide isomerase associated 4	12304	0.0422214	-1.0633	Downregulated
Sytl4	synaptotagmin-like 4	27359	0.0463863	-1.0649	Downregulated
Aco1	aconitase 1	11428	0.0287809	-1.0656	Downregulated
Acp6	acid phosphatase 6, lysophosphatidic	66659	0.031126	-1.0661	Downregulated
Tapbpl	TAP binding protein-like	213233	0.0350271	-1.06834	Downregulated
Gatd1	glutamine amidotransferase like class 1 domain containing 1	213350	0.0475837	-1.06923	Downregulated
Mtm1	X-linked myotubular myopathy gene 1	17772	0.0300087	-1.0695	Downregulated
2810006K23Rik	RIKEN cDNA 2810006K23 gene	72650	0.0224086	-1.07071	Downregulated
Abca8a	ATP-binding cassette, sub-family A (ABC1), member 8a	217258	0.0430281	-1.07371	Downregulated
Cdnf	cerebral dopamine neurotrophic factor	227526	0.0461075	-1.08455	Downregulated
2310069B03Rik	RIKEN cDNA 2310069B03 gene	69652	0.0493023	-1.08929	Downregulated
Syne1	spectrin repeat containing, nuclear envelope 1	64009	0.0361482	-1.09171	Downregulated
Mlxipl	MLX interacting protein-like	58805	0.0424935	-1.0924	Downregulated
Napepld	N-acyl phosphatidylethanolamine phospholipase D	242864	0.0444032	-1.09684	Downregulated
Ssbp3	single-stranded DNA binding protein 3	72475	0.0330471	-1.09699	Downregulated
Afdn	afadin, adherens junction formation factor	17356	0.037776	-1.10742	Downregulated
Akap7	A kinase (PRKA) anchor protein 7	432442	0.0238224	-1.11059	Downregulated
Pald1	phosphatase domain containing, paladin 1	27355	0.0356052	-1.11621	Downregulated
Dcaf4	DDB1 and CUL4 associated factor 4	73828	0.0343369	-1.11943	Downregulated
Gucd1	guanylyl cyclase domain containing 1	68778	0.0292583	-1.11996	Downregulated
Ttl	tubulin tyrosine ligase	69737	0.0239693	-1.12838	Downregulated
Btbd8	BTB (POZ) domain containing 8	100503185	0.0404462	-1.13252	Downregulated
Txndc5	thioredoxin domain containing 5	105245	0.0415826	-1.13513	Downregulated
Dmtn	dematin actin binding protein	13829	0.0426671	-1.13733	Downregulated
Rps6ka5	ribosomal protein S6 kinase, polypeptide 5	73086	0.034091	-1.14012	Downregulated
Tenm4	teneurin transmembrane protein 4	23966	0.0455079	-1.14434	Downregulated
Lipe	lipase, hormone sensitive	16890	0.0406508	-1.14438	Downregulated
Arpin	actin-related protein 2/3 complex inhibitor	70420	0.0332972	-1.14521	Downregulated
Tlr3	toll-like receptor 3	142980	0.0498487	-1.14675	Downregulated
Dtx2	deltex 2, E3 ubiquitin ligase	74198	0.0385328	-1.14923	Downregulated
Gale	galactose-4-epimerase, UDP	74246	0.0369709	-1.15035	Downregulated
Fut8	fucosyltransferase 8	53618	0.0151042	-1.15153	Downregulated
Epn2	epsin 2	13855	0.0344067	-1.15572	Downregulated
Rpp40	ribonuclease P 40 subunit	208366	0.0312173	-1.15603	Downregulated
Rsad2	radical S-adenosyl methionine domain containing 2	58185	0.0438396	-1.16069	Downregulated
Cgnl1	cingulin-like 1	68178	0.0442235	-1.16244	Downregulated
Triobp	TRIO and F-actin binding protein	110253	0.0293754	-1.16296	Downregulated
Sgsh	N-sulfoglucosamine sulfohydrolase (sulfamidase)	27029	0.0450787	-1.16476	Downregulated
Tor4a	torsin family 4, member A	227612	0.0412894	-1.16744	Downregulated
Cep250	centrosomal protein 250	16328	0.0408047	-1.16898	Downregulated
Rab29	RAB29, member RAS oncogene family	226422	0.0295756	-1.17105	Downregulated
Meis2	Meis homeobox 2	17536	0.0349698	-1.1717	Downregulated
Dennd11	DENN domain containing 11	243780	0.0348075	-1.17228	Downregulated
Eef2k	eukaryotic elongation factor-2 kinase	13631	0.0466012	-1.17312	Downregulated
Rab3d	RAB3D, member RAS oncogene family	19340	0.0434867	-1.17442	Downregulated
Pygb	brain glycogen phosphorylase	110078	0.0495611	-1.17506	Downregulated
Slc46a3	solute carrier family 46, member 3	71706	0.0310121	-1.17583	Downregulated
Nod1	nucleotide-binding oligomerization domain containing 1	107607	0.0460878	-1.17917	Downregulated
Usp46	ubiquitin specific peptidase 46	69727	0.0260165	-1.1805	Downregulated
Camkk2	calcium/calmodulin-dependent protein kinase kinase 2, beta	207565	0.0338297	-1.18594	Downregulated
Bbx	bobby sox HMG box containing	70508	0.0278695	-1.19226	Downregulated
Ebf3	early B cell factor 3	13593	0.03499	-1.19333	Downregulated
Fam107b	family with sequence similarity 107, member B	66540	0.0354948	-1.19339	Downregulated
Cntnap1	contactin associated protein-like 1	53321	0.0353548	-1.19418	Downregulated
Myo5c	myosin VC	208943	0.0277611	-1.1952	Downregulated
Tap2	transporter 2, ATP-binding cassette, sub-family B (MDR/TAP)	21355	0.0441656	-1.19523	Downregulated
Mtap	methylthioadenosine phosphorylase	66902	0.0236748	-1.20309	Downregulated
Bcl7a	B cell CLL/lymphoma 7A	77045	0.0465354	-1.20743	Downregulated
Cad	carbamoyl-phosphate synthetase 2, aspartate transcarbamylase, and dihydroorotase	69719	0.0387288	-1.21389	Downregulated
Mmd	monocyte to macrophage differentiation-associated	67468	0.031781	-1.21684	Downregulated
Zbtb14	zinc finger and BTB domain containing 14	22666	0.0308393	-1.22378	Downregulated
Fam217b	family with sequence similarity 217, member B	71532	0.0306197	-1.22525	Downregulated
Marcks	myristoylated alanine rich protein kinase C substrate	17118	0.0191497	-1.22678	Downregulated
Lgals12	lectin, galactose binding, soluble 12	56072	0.0429995	-1.22896	Downregulated
Mcph1	microcephaly, primary autosomal recessive 1	244329	0.0370895	-1.22967	Downregulated
Crot	carnitine O-octanoyltransferase	74114	0.034879	-1.23016	Downregulated
Gpd1l	glycerol-3-phosphate dehydrogenase 1-like	333433	0.0187852	-1.23135	Downregulated
Amotl1	angiomotin-like 1	75723	0.0430764	-1.23289	Downregulated
Plxna1	plexin A1	18844	0.0201713	-1.23307	Downregulated
Gnptab	N-acetylglucosamine-1-phosphate transferase, alpha and beta subunits	432486	0.035433	-1.2357	Downregulated
Tspan14	tetraspanin 14	52588	0.0347304	-1.23724	Downregulated
Parp16	poly (ADP-ribose) polymerase family, member 16	214424	0.0396065	-1.24114	Downregulated
Cdh2	cadherin 2	12558	0.0250563	-1.24461	Downregulated
Zmym3	zinc finger, MYM-type 3	56364	0.0337405	-1.24737	Downregulated
Cyp4v3	cytochrome P450, family 4, subfamily v, polypeptide 3	102294	0.0446626	-1.24846	Downregulated
Rad51d	RAD51 paralog D	19364	0.00915939	-1.24908	Downregulated
Rdh10	retinol dehydrogenase 10 (all-trans)	98711	0.0218675	-1.25545	Downregulated
Pnpla3	patatin-like phospholipase domain containing 3	116939	0.0440716	-1.26108	Downregulated
Thnsl1	threonine synthase-like 1 (bacterial)	208967	0.029637	-1.2641	Downregulated
Pnldc1	poly(A)-specific ribonuclease (PARN)-like domain containing 1	240023	0.0471477	-1.28554	Downregulated
Limch1	LIM and calponin homology domains 1	77569	0.04646	-1.29009	Downregulated
Gab1	growth factor receptor bound protein 2-associated protein 1	14388	0.0312701	-1.29055	Downregulated
Klf10	Kruppel-like factor 10	21847	0.0471116	-1.29687	Downregulated
Dusp7	dual specificity phosphatase 7	235584	0.0350962	-1.29804	Downregulated
Anks1	ankyrin repeat and SAM domain containing 1	224650	0.0190154	-1.30239	Downregulated
Amer1	APC membrane recruitment 1	72345	0.0261197	-1.30254	Downregulated
Lrrc15	leucine rich repeat containing 15	74488	0.0395664	-1.31331	Downregulated
Tap1	transporter 1, ATP-binding cassette, sub-family B (MDR/TAP)	21354	0.0303534	-1.31622	Downregulated
Rab30	RAB30, member RAS oncogene family	75985	0.0256142	-1.31626	Downregulated
Zeb2	zinc finger E-box binding homeobox 2	24136	0.0172601	-1.32114	Downregulated
Map3k4	mitogen-activated protein kinase kinase kinase 4	26407	0.0286074	-1.3251	Downregulated
Atp13a2	ATPase type 13A2	74772	0.0474907	-1.32906	Downregulated
Sorl1	sortilin-related receptor, LDLR class A repeats-containing	20660	0.0454617	-1.3313	Downregulated
Pomt1	protein-O-mannosyltransferase 1	99011	0.0240654	-1.3321	Downregulated
Slc1a3	solute carrier family 1 (glial high affinity glutamate transporter), member 3	20512	0.0372219	-1.33315	Downregulated
Ntrk3	neurotrophic tyrosine kinase, receptor, type 3	18213	0.0360597	-1.33652	Downregulated
Trim21	tripartite motif-containing 21	20821	0.0288028	-1.3381	Downregulated
Tmem131l	transmembrane 131 like	229473	0.0265087	-1.34221	Downregulated
C1rl	complement component 1, r subcomponent-like	232371	0.0251178	-1.34375	Downregulated
Paqr9	progestin and adipoQ receptor family member IX	75552	0.0188787	-1.34537	Downregulated
Ddx58	DEAD/H box helicase 58	230073	0.0318194	-1.34746	Downregulated
Parp10	poly (ADP-ribose) polymerase family, member 10	671535	0.0214841	-1.34815	Downregulated
Fam102a	family with sequence similarity 102, member A	98952	0.035929	-1.35239	Downregulated
Irgm2	immunity-related GTPase family M member 2	54396	0.042075	-1.35258	Downregulated
Hyal1	hyaluronoglucosaminidase 1	15586	0.0200674	-1.35269	Downregulated
Xbp1	X-box binding protein 1	22433	0.0390061	-1.3545	Downregulated
Acss2	acyl-CoA synthetase short-chain family member 2	60525	0.0396362	-1.35739	Downregulated
Arhgef40	Rho guanine nucleotide exchange factor (GEF) 40	268739	0.0176631	-1.35942	Downregulated
Pxdn	peroxidasin	69675	0.0340121	-1.36156	Downregulated
Klhl42	kelch-like 42	232539	0.0236854	-1.3677	Downregulated
Plgrkt	plasminogen receptor, C-terminal lysine transmembrane protein	67759	0.0221717	-1.37496	Downregulated
Sc5d	sterol-C5-desaturase	235293	0.0168957	-1.37681	Downregulated
Psmb9	proteasome (prosome, macropain) subunit, beta type 9 (large multifunctional peptidase 2)	16912	0.0385141	-1.38004	Downregulated
Ar	androgen receptor	11835	0.0489871	-1.38143	Downregulated
Pwwp3a	PWWP domain containing 3A, DNA repair factor	68114	0.0228709	-1.38634	Downregulated
Ttyh2	tweety family member 2	117160	0.0345257	-1.38917	Downregulated
Nat8l	N-acetyltransferase 8-like	269642	0.0264326	-1.39026	Downregulated
Naa80	N(alpha)-acetyltransferase 80, NatH catalytic subunit	56441	0.0258566	-1.40205	Downregulated
N4bp2l1	NEDD4 binding protein 2-like 1	100637	0.0216827	-1.41065	Downregulated
Gbp7	guanylate binding protein 7	229900	0.0341555	-1.41194	Downregulated
Casp3	caspase 3	12367	0.0213252	-1.41236	Downregulated
Tmem79	transmembrane protein 79	71913	0.0394656	-1.41295	Downregulated
Smarca2	SWI/SNF related, matrix associated, actin dependent regulator of chromatin, subfamily a, member 2	67155	0.0167848	-1.42041	Downregulated
Popdc2	popeye domain containing 2	64082	0.0418585	-1.42637	Downregulated
Tmem164	transmembrane protein 164	209497	0.0197182	-1.42703	Downregulated
Pou6f1	POU domain, class 6, transcription factor 1	19009	0.018016	-1.43139	Downregulated
Septin9	septin 9	53860	0.0238103	-1.43255	Downregulated
Tgfbr2	transforming growth factor, beta receptor II	21813	0.0308876	-1.43376	Downregulated
Gbp2	guanylate binding protein 2	14469	0.0395105	-1.43587	Downregulated
A830018L16Rik	RIKEN cDNA A830018L16 gene	320492	0.0293538	-1.43903	Downregulated
Msh2	mutS homolog 2	17685	0.0158553	-1.44047	Downregulated
Entpd6	ectonucleoside triphosphate diphosphohydrolase 6	12497	0.0240567	-1.44103	Downregulated
Osbpl5	oxysterol binding protein-like 5	79196	0.0110098	-1.44175	Downregulated
Wdr6	WD repeat domain 6	83669	0.0280532	-1.4437	Downregulated
Ikzf2	IKAROS family zinc finger 2	22779	0.0167825	-1.45211	Downregulated
Sh3pxd2a	SH3 and PX domains 2A	14218	0.0264533	-1.46306	Downregulated
Lrig1	leucine-rich repeats and immunoglobulin-like domains 1	16206	0.0212124	-1.47405	Downregulated
Aatk	apoptosis-associated tyrosine kinase	11302	0.0316683	-1.47911	Downregulated
Coq8a	coenzyme Q8A	67426	0.0247381	-1.49122	Downregulated
Fsd2	fibronectin type III and SPRY domain containing 2	244091	0.0445672	-1.4913	Downregulated
Steap4	STEAP family member 4	117167	0.0440555	-1.4961	Downregulated
Ighm	immunoglobulin heavy constant mu	16019	0.0451937	-1.50184	Downregulated
Slc37a4	solute carrier family 37 (glucose-6-phosphate transporter), member 4	14385	0.0262543	-1.50255	Downregulated
Tbc1d2b	TBC1 domain family, member 2B	67016	0.0212778	-1.50665	Downregulated
Ppp1r9a	protein phosphatase 1, regulatory subunit 9A	243725	0.0207446	-1.51281	Downregulated
Zfp467	zinc finger protein 467	68910	0.0257318	-1.51401	Downregulated
Grb14	growth factor receptor bound protein 14	50915	0.033719	-1.52099	Downregulated
Hlf	hepatic leukemia factor	217082	0.0215337	-1.53715	Downregulated
Slc26a10	solute carrier family 26, member 10	216441	0.0261954	-1.54447	Downregulated
Cdkn2c	cyclin dependent kinase inhibitor 2C	12580	0.0143109	-1.54457	Downregulated
Cd200	CD200 antigen	17470	0.0168385	-1.54595	Downregulated
Vav2	vav 2 oncogene	22325	0.0120311	-1.54931	Downregulated
Abcd2	ATP-binding cassette, sub-family D (ALD), member 2	26874	0.0462505	-1.5498	Downregulated
Tbc1d31	TBC1 domain family, member 31	210544	0.017338	-1.55118	Downregulated
Dram1	DNA-damage regulated autophagy modulator 1	71712	0.0219173	-1.55606	Downregulated
Cc2d2a	coiled-coil and C2 domain containing 2A	231214	0.0166747	-1.55622	Downregulated
Fam53b	family with sequence similarity 53, member B	77938	0.022393	-1.56673	Downregulated
Mfsd12	major facilitator superfamily domain containing 12	73822	0.0247716	-1.57097	Downregulated
P2ry14	purinergic receptor P2Y, G-protein coupled, 14	140795	0.0192144	-1.58078	Downregulated
Adora1	adenosine A1 receptor	11539	0.0158594	-1.58209	Downregulated
Angptl8	angiopoietin-like 8	624219	0.0348584	-1.58726	Downregulated
Ltbp2	latent transforming growth factor beta binding protein 2	16997	0.0246543	-1.58771	Downregulated
St3gal4	ST3 beta-galactoside alpha-2,3-sialyltransferase 4	20443	0.0200475	-1.59163	Downregulated
Pygo1	pygopus 1	72135	0.0174801	-1.5994	Downregulated
Chst15	carbohydrate sulfotransferase 15	77590	0.0275198	-1.60232	Downregulated
Rbfox2	RNA binding protein, fox-1 homolog (C. elegans) 2	93686	0.00860682	-1.60987	Downregulated
Arap1	ArfGAP with RhoGAP domain, ankyrin repeat and PH domain 1	69710	0.0238839	-1.6241	Downregulated
Slc16a7	solute carrier family 16 (monocarboxylic acid transporters), member 7	20503	0.0205455	-1.62829	Downregulated
Kank2	KN motif and ankyrin repeat domains 2	235041	0.0247949	-1.63012	Downregulated
Chdh	choline dehydrogenase	218865	0.0207051	-1.64382	Downregulated
Hpgd	hydroxyprostaglandin dehydrogenase 15 (NAD)	15446	0.0274665	-1.64629	Downregulated
Bhlhe40	basic helix-loop-helix family, member e40	20893	0.0388091	-1.64665	Downregulated
Igtp	interferon gamma induced GTPase	16145	0.0240878	-1.65172	Downregulated
Odf3l1	outer dense fiber of sperm tails 3-like 1	382075	0.0295068	-1.65795	Downregulated
Slc22a3	solute carrier family 22 (organic cation transporter), member 3	20519	0.0243248	-1.66037	Downregulated
Slc2a5	solute carrier family 2 (facilitated glucose transporter), member 5	56485	0.0273994	-1.6625	Downregulated
Ppp1r3d	protein phosphatase 1, regulatory subunit 3D	228966	0.0130517	-1.66365	Downregulated
Zfp185	zinc finger protein 185	22673	0.0097227	-1.66534	Downregulated
Ndc1	NDC1 transmembrane nucleoporin	72787	0.0174023	-1.66837	Downregulated
Med12l	mediator complex subunit 12-like	329650	0.0160558	-1.67	Downregulated
Kcnb1	potassium voltage gated channel, Shab-related subfamily, member 1	16500	0.0193879	-1.67396	Downregulated
Gbp9	guanylate-binding protein 9	236573	0.0189852	-1.67426	Downregulated
Dnajc28	DnaJ heat shock protein family (Hsp40) member C28	246738	0.010335	-1.6744	Downregulated
Hephl1	hephaestin-like 1	244698	0.0324886	-1.67584	Downregulated
Acly	ATP citrate lyase	104112	0.0268897	-1.69149	Downregulated
Dbp	D site albumin promoter binding protein	13170	0.0209861	-1.71943	Downregulated
Id2	inhibitor of DNA binding 2	15902	0.0231509	-1.72077	Downregulated
Wnt5a	wingless-type MMTV integration site family, member 5A	22418	0.00815599	-1.74936	Downregulated
Trps1	transcriptional repressor GATA binding 1	83925	0.016407	-1.75513	Downregulated
Stat5a	signal transducer and activator of transcription 5A	20850	0.0131853	-1.76361	Downregulated
Adap1	ArfGAP with dual PH domains 1	231821	0.0235625	-1.76918	Downregulated
Gprc5c	G protein-coupled receptor, family C, group 5, member C	70355	0.0101004	-1.77069	Downregulated
Angptl2	angiopoietin-like 2	26360	0.0119028	-1.78681	Downregulated
Tspan18	tetraspanin 18	241556	0.0115564	-1.78708	Downregulated
Cd274	CD274 antigen	60533	0.013054	-1.80246	Downregulated
Lama4	laminin, alpha 4	16775	0.0136856	-1.81754	Downregulated
Polr3g	polymerase (RNA) III (DNA directed) polypeptide G	67486	0.0133426	-1.83658	Downregulated
Ptpn14	protein tyrosine phosphatase, non-receptor type 14	19250	0.0117879	-1.84382	Downregulated
Esr1	estrogen receptor 1 (alpha)	13982	0.0129509	-1.86513	Downregulated
Phlda3	pleckstrin homology like domain, family A, member 3	27280	0.0139313	-1.86552	Downregulated
Plekhh3	pleckstrin homology domain containing, family H (with MyTH4 domain) member 3	217198	0.00974414	-1.87182	Downregulated
Chn1	chimerin 1	108699	0.0196565	-1.87655	Downregulated
Nr3c2	nuclear receptor subfamily 3, group C, member 2	110784	0.0067849	-1.89486	Downregulated
Gypc	glycophorin C	71683	0.0100047	-1.89585	Downregulated
Cspg4	chondroitin sulfate proteoglycan 4	121021	0.0147019	-1.90565	Downregulated
Smoc1	SPARC related modular calcium binding 1	64075	0.0168549	-1.90663	Downregulated
Marveld1	MARVEL (membrane-associating) domain containing 1	277010	0.0105574	-1.9215	Downregulated
Sntb1	syntrophin, basic 1	20649	0.0309222	-1.92476	Downregulated
Mblac2	metallo-beta-lactamase domain containing 2	72852	0.011447	-1.9371	Downregulated
Epb41l2	erythrocyte membrane protein band 4.1 like 2	13822	0.0038781	-1.94636	Downregulated
Sspn	sarcospan	16651	0.0148153	-1.94658	Downregulated
Slc1a5	solute carrier family 1 (neutral amino acid transporter), member 5	20514	0.0139614	-2.00068	Downregulated
Iigp1	interferon inducible GTPase 1	60440	0.0191873	-2.02306	Downregulated
Gprin3	GPRIN family member 3	243385	0.00519719	-2.04796	Downregulated
Irs3	insulin receptor substrate 3	16369	0.00808705	-2.09563	Downregulated
Cebpa	CCAAT/enhancer binding protein (C/EBP), alpha	12606	0.0114161	-2.11253	Downregulated
Sbk1	SH3-binding kinase 1	104175	0.0141146	-2.1222	Downregulated
Igfbp5	insulin-like growth factor binding protein 5	16011	0.0179485	-2.12792	Downregulated
Cdk6	cyclin-dependent kinase 6	12571	0.00679951	-2.15163	Downregulated
Gbp4	guanylate binding protein 4	17472	0.0116964	-2.19372	Downregulated
Dgat2	diacylglycerol O-acyltransferase 2	67800	0.0107012	-2.22379	Downregulated
Tmem179	transmembrane protein 179	104885	0.0131346	-2.23617	Downregulated
Myorg	myogenesis regulating glycosidase (putative)	329828	0.00932732	-2.23717	Downregulated
Dixdc1	DIX domain containing 1	330938	0.00480539	-2.27062	Downregulated
Ampd2	adenosine monophosphate deaminase 2	109674	0.0079481	-2.30438	Downregulated
Aacs	acetoacetyl-CoA synthetase	78894	0.00782674	-2.3296	Downregulated
Scd2	stearoyl-Coenzyme A desaturase 2	20250	0.0154082	-2.34156	Downregulated
Igf1	insulin-like growth factor 1	16000	0.0130432	-2.42418	Downregulated
Per3	period circadian clock 3	18628	0.00162968	-2.49694	Downregulated
Mid1ip1	Mid1 interacting protein 1 (gastrulation specific G12-like (zebrafish))	68041	0.00172376	-2.58296	Downregulated
P2rx5	purinergic receptor P2X, ligand-gated ion channel, 5	94045	0.00151602	-2.69379	Downregulated
Angpt1	angiopoietin 1	11600	0.00499065	-2.77668	Downregulated
Trarg1	trafficking regulator of GLUT4 (SLC2A4) 1	237858	0.00458934	-2.81417	Downregulated
Kit	KIT proto-oncogene receptor tyrosine kinase	16590	0.00691611	-2.83704	Downregulated
Pik3r1	phosphoinositide-3-kinase regulatory subunit 1	18708	0.00786868	-2.87874	Downregulated
Ttc25	tetratricopeptide repeat domain 25	74407	0.00731271	-2.88569	Downregulated
Thrsp	thyroid hormone responsive	21835	0.00334533	-2.90823	Downregulated
Ppp1r3b	protein phosphatase 1, regulatory subunit 3B	244416	0.000315773	-2.9699	Downregulated
Rasl12	RAS-like, family 12	70784	0.00380604	-2.97206	Downregulated
A530016L24Rik	RIKEN cDNA A530016L24 gene	319942	0.00402562	-3.06185	Downregulated
Srebf1	sterol regulatory element binding transcription factor 1	20787	0.00132181	-3.34307	Downregulated
Kbtbd11	kelch repeat and BTB (POZ) domain containing 11	74901	0.000488495	-3.40365	Downregulated
Klhdc7a	kelch domain containing 7A	242721	7.34636e-05	-4.9096	Downregulated

## Sheet: Old CE vs Old RT
Gene information			Overall p value	Log2-fold-change	DEG
Symbol	Description	Entrez ID	Old CE/Old RT	Old CE/Old RT	Old CE/Old RT
Ppargc1a	peroxisome proliferative activated receptor, gamma, coactivator 1 alpha	19017	2.84693e-06	4.39795	Upregulated
Ttn	titin	22138	0.0243101	3.73525	Upregulated
Hmox1	heme oxygenase 1	15368	0.000172817	3.62519	Upregulated
Dio2	deiodinase, iodothyronine, type II	13371	8.31974e-05	3.55503	Upregulated
Cldn1	claudin 1	12737	0.000696753	3.14381	Upregulated
Hsph1	heat shock 105kDa/110kDa protein 1	15505	0.000518929	3.01369	Upregulated
Slc20a1	solute carrier family 20, member 1	20515	5.62487e-05	2.91964	Upregulated
Ugp2	UDP-glucose pyrophosphorylase 2	216558	0.000104183	2.78468	Upregulated
Perm1	PPARGC1 and ESRR induced regulator, muscle 1	74183	0.000111829	2.77796	Upregulated
Dusp1	dual specificity phosphatase 1	19252	0.00021445	2.77079	Upregulated
Dusp6	dual specificity phosphatase 6	67603	0.000728915	2.64519	Upregulated
Gmpr	guanosine monophosphate reductase	66355	0.00191513	2.62058	Upregulated
Ttpa	tocopherol (alpha) transfer protein	50500	0.00678332	2.56246	Upregulated
Dhrs9	dehydrogenase/reductase (SDR family) member 9	241452	0.000570722	2.5139	Upregulated
Slc3a2	solute carrier family 3 (activators of dibasic and neutral amino acid transport), member 2	17254	0.00102772	2.4152	Upregulated
Irf4	interferon regulatory factor 4	16364	0.0124806	2.39392	Upregulated
Atf4	activating transcription factor 4	11911	9.14929e-05	2.31113	Upregulated
Irs2	insulin receptor substrate 2	384783	0.000749639	2.29875	Upregulated
Cars2	cysteinyl-tRNA synthetase 2 (mitochondrial)(putative)	71941	0.00446022	2.28854	Upregulated
Hspa8	heat shock protein 8	15481	0.000421014	2.279	Upregulated
Sgk2	serum/glucocorticoid regulated kinase 2	27219	0.00111261	2.2727	Upregulated
Lamb3	laminin, beta 3	16780	0.00450428	2.25799	Upregulated
Eif1a	eukaryotic translation initiation factor 1A	13664	0.00120682	2.24183	Upregulated
Maff	v-maf musculoaponeurotic fibrosarcoma oncogene family, protein F (avian)	17133	0.00540739	2.22631	Upregulated
Gadd45g	growth arrest and DNA-damage-inducible 45 gamma	23882	0.0127207	2.18222	Upregulated
Gas1	growth arrest specific 1	14451	0.000280498	2.128	Upregulated
Rbp7	retinol binding protein 7, cellular	63954	0.00487515	2.1253	Upregulated
Sik1	salt inducible kinase 1	17691	0.00260808	2.12273	Upregulated
Dusp16	dual specificity phosphatase 16	70686	0.000293003	2.07533	Upregulated
Nr4a2	nuclear receptor subfamily 4, group A, member 2	18227	0.0019421	2.06487	Upregulated
Socs2	suppressor of cytokine signaling 2	216233	0.0112318	2.03862	Upregulated
Hilpda	hypoxia inducible lipid droplet associated	69573	0.00201932	2.02146	Upregulated
Hsp90aa1	heat shock protein 90, alpha (cytosolic), class A member 1	15519	0.000867325	2.01974	Upregulated
Plin2	perilipin 2	11520	0.000909799	2.00864	Upregulated
P4ha1	procollagen-proline, 2-oxoglutarate 4-dioxygenase (proline 4-hydroxylase), alpha 1 polypeptide	18451	0.00113018	2.00218	Upregulated
Noct	nocturnin	12457	0.00339582	1.99571	Upregulated
Sav1	salvador family WW domain containing 1	64010	0.0100758	1.99051	Upregulated
Got1	glutamic-oxaloacetic transaminase 1, soluble	14718	0.000935595	1.99007	Upregulated
Slc39a14	solute carrier family 39 (zinc transporter), member 14	213053	0.0272461	1.98746	Upregulated
Sash1	SAM and SH3 domain containing 1	70097	0.00628523	1.95899	Upregulated
Depp1	DEPP1 autophagy regulator	213393	0.026626	1.95626	Upregulated
Jun	jun proto-oncogene	16476	0.00645637	1.94704	Upregulated
Mfsd2a	major facilitator superfamily domain containing 2A	76574	0.0329433	1.94091	Upregulated
Lncbate10	brown adipose tissue enriched long noncoding RNA 10	442846	0.00224403	1.92108	Upregulated
Hspb1	heat shock protein 1	15507	0.002118	1.90691	Upregulated
Elovl3	elongation of very long chain fatty acids (FEN1/Elo2, SUR4/Elo3, yeast)-like 3	12686	0.00336961	1.85254	Upregulated
Slc15a2	solute carrier family 15 (H+/peptide transporter), member 2	57738	0.0145665	1.81417	Upregulated
Prune2	prune homolog 2	353211	0.0366611	1.8116	Upregulated
Fosl2	fos-like antigen 2	14284	0.0117949	1.79732	Upregulated
Akap12	A kinase (PRKA) anchor protein (gravin) 12	83397	0.00669328	1.79277	Upregulated
Sat1	spermidine/spermine N1-acetyl transferase 1	20229	0.00153922	1.78735	Upregulated
Arntl	aryl hydrocarbon receptor nuclear translocator-like	11865	0.0190618	1.78343	Upregulated
Gla	galactosidase, alpha	11605	0.00204023	1.77369	Upregulated
Sdc4	syndecan 4	20971	0.0154635	1.76619	Upregulated
Dnajb1	DnaJ heat shock protein family (Hsp40) member B1	81489	0.000656128	1.76162	Upregulated
Bag3	BCL2-associated athanogene 3	29810	0.003712	1.75746	Upregulated
Adamts1	a disintegrin-like and metallopeptidase (reprolysin type) with thrombospondin type 1 motif, 1	11504	0.00264494	1.75033	Upregulated
Gk	glycerol kinase	14933	0.000948692	1.7395	Upregulated
Fam117a	family with sequence similarity 117, member A	215512	0.00488058	1.73047	Upregulated
Apold1	apolipoprotein L domain containing 1	381823	0.00694967	1.72412	Upregulated
Nnmt	nicotinamide N-methyltransferase	18113	0.00880218	1.71418	Upregulated
Plekhm2	pleckstrin homology domain containing, family M (with RUN domain) member 2	69582	0.00122747	1.71353	Upregulated
Slc38a2	solute carrier family 38, member 2	67760	0.00673949	1.71208	Upregulated
Ankrd9	ankyrin repeat domain 9	74251	0.0027367	1.68436	Upregulated
Cldn5	claudin 5	12741	0.00524402	1.68268	Upregulated
Hccs	holocytochrome c synthetase	15159	0.000445672	1.67568	Upregulated
Nabp1	nucleic acid binding protein 1	109019	0.00317023	1.67524	Upregulated
Ackr3	atypical chemokine receptor 3	12778	0.00433751	1.65218	Upregulated
Hspa4l	heat shock protein 4 like	18415	0.00356418	1.65034	Upregulated
Spry4	sprouty RTK signaling antagonist 4	24066	0.00508253	1.64673	Upregulated
Ifrd1	interferon-related developmental regulator 1	15982	0.00561612	1.63883	Upregulated
Acsl3	acyl-CoA synthetase long-chain family member 3	74205	0.00571202	1.63238	Upregulated
Pvr	poliovirus receptor	52118	0.00650936	1.63117	Upregulated
Dnajb9	DnaJ heat shock protein family (Hsp40) member B9	27362	0.00119402	1.61762	Upregulated
Pdk4	pyruvate dehydrogenase kinase, isoenzyme 4	27273	0.00574619	1.58942	Upregulated
Cend1	cell cycle exit and neuronal differentiation 1	57754	0.0202507	1.58554	Upregulated
Ppp1r15a	protein phosphatase 1, regulatory subunit 15A	17872	0.0076977	1.57769	Upregulated
Impact	impact, RWD domain protein	16210	0.00248146	1.57493	Upregulated
Tiparp	TCDD-inducible poly(ADP-ribose) polymerase	99929	0.00763235	1.5647	Upregulated
Nes	nestin	18008	0.00833023	1.56394	Upregulated
Ffar4	free fatty acid receptor 4	107221	0.00551036	1.5636	Upregulated
Chst11	carbohydrate sulfotransferase 11	58250	0.00915322	1.55676	Upregulated
Sec24a	Sec24 related gene family, member A (S. cerevisiae)	77371	0.013281	1.54613	Upregulated
Ercc1	excision repair cross-complementing rodent repair deficiency, complementation group 1	13870	0.00932068	1.5433	Upregulated
Lipg	lipase, endothelial	16891	0.00681795	1.53172	Upregulated
Tmem140	transmembrane protein 140	68487	0.00961257	1.52351	Upregulated
Cdc27	cell division cycle 27	217232	0.000549449	1.5218	Upregulated
Zfp52	zinc finger protein 52	22710	0.000662517	1.51858	Upregulated
Atp6v1h	ATPase, H+ transporting, lysosomal V1 subunit H	108664	0.00134032	1.51104	Upregulated
Gm19221	protein phosphatase 2 (formerly 2A), regulatory subunit B (PR 52), alpha isoform pseudogene	100418453	0.0151427	1.49874	Upregulated
Nrbf2	nuclear receptor binding factor 2	641340	0.0127788	1.47817	Upregulated
Chka	choline kinase alpha	12660	0.0123197	1.46547	Upregulated
Mapkapk2	MAP kinase-activated protein kinase 2	17164	0.00121754	1.46494	Upregulated
Chordc1	cysteine and histidine-rich domain (CHORD)-containing, zinc-binding protein 1	66917	0.00385163	1.45562	Upregulated
Acer2	alkaline ceramidase 2	230379	0.0261214	1.44753	Upregulated
Sqle	squalene epoxidase	20775	0.0140339	1.4423	Upregulated
Pde7b	phosphodiesterase 7B	29863	0.0126137	1.44048	Upregulated
Litaf	LPS-induced TN factor	56722	0.0086056	1.43153	Upregulated
Slc7a6	solute carrier family 7 (cationic amino acid transporter, y+ system), member 6	330836	0.00547184	1.4305	Upregulated
Cpeb4	cytoplasmic polyadenylation element binding protein 4	67579	0.012539	1.40953	Upregulated
Ahsa1	AHA1, activator of heat shock protein ATPase 1	217737	0.00335638	1.4083	Upregulated
Nfil3	nuclear factor, interleukin 3, regulated	18030	0.0307503	1.40569	Upregulated
Irak2	interleukin-1 receptor-associated kinase 2	108960	0.00559013	1.39605	Upregulated
Dlc1	deleted in liver cancer 1	50768	0.0110036	1.39429	Upregulated
Pfkp	phosphofructokinase, platelet	56421	0.00116282	1.39377	Upregulated
Zbtb38	zinc finger and BTB domain containing 38	245007	0.00445772	1.39359	Upregulated
Clstn3	calsyntenin 3	232370	0.00168288	1.38604	Upregulated
Hspb8	heat shock protein 8	80888	0.00539872	1.37964	Upregulated
Stard5	StAR-related lipid transfer (START) domain containing 5	170460	0.00284314	1.37241	Upregulated
Zbtb21	zinc finger and BTB domain containing 21	114565	0.00492941	1.36749	Upregulated
Zfp770	zinc finger protein 770	228491	0.000138448	1.36068	Upregulated
Hdac6	histone deacetylase 6	15185	0.00269098	1.34821	Upregulated
Cth	cystathionase (cystathionine gamma-lyase)	107869	0.00969644	1.34444	Upregulated
Tpcn2	two pore segment channel 2	233979	0.00100107	1.33498	Upregulated
Atf5	activating transcription factor 5	107503	0.00652736	1.32876	Upregulated
Lncbate1	brown adipose tissue enriched long non-coding RNA 1	109215	0.00807832	1.31464	Upregulated
Foxn2	forkhead box N2	14236	0.00268765	1.31171	Upregulated
Pde4d	phosphodiesterase 4D, cAMP specific	238871	0.0116809	1.30938	Upregulated
Sgk1	serum/glucocorticoid regulated kinase 1	20393	0.0321141	1.30735	Upregulated
AW011738	expressed sequence AW011738	100382	0.00205497	1.30071	Upregulated
Ccl9	chemokine (C-C motif) ligand 9	20308	0.016024	1.29963	Upregulated
Ccn1	cellular communication network factor 1	16007	0.0421165	1.29421	Upregulated
Gnl3	guanine nucleotide binding protein-like 3 (nucleolar)	30877	0.0144278	1.29374	Upregulated
Lyve1	lymphatic vessel endothelial hyaluronan receptor 1	114332	0.0296433	1.2915	Upregulated
Sqstm1	sequestosome 1	18412	0.00206492	1.2892	Upregulated
Kcnk3	potassium channel, subfamily K, member 3	16527	0.00357916	1.28536	Upregulated
Tnfrsf12a	tumor necrosis factor receptor superfamily, member 12a	27279	0.0140287	1.27434	Upregulated
Ttc1	tetratricopeptide repeat domain 1	66827	0.00401384	1.27155	Upregulated
Dnajc27	DnaJ heat shock protein family (Hsp40) member C27	217378	0.00408407	1.27122	Upregulated
Ppp2ca	protein phosphatase 2 (formerly 2A), catalytic subunit, alpha isoform	19052	0.00235168	1.26639	Upregulated
Ehbp1l1	EH domain binding protein 1-like 1	114601	0.0225182	1.26357	Upregulated
Map2k3os	mitogen-activated protein kinase kinase 3, opposite strand	24082	0.00879325	1.26152	Upregulated
Snrk	SNF related kinase	20623	0.00387731	1.26009	Upregulated
Dnaja1	DnaJ heat shock protein family (Hsp40) member A1	15502	0.00401872	1.25398	Upregulated
Plekhg1	pleckstrin homology domain containing, family G (with RhoGef domain) member 1	213783	0.00677348	1.2529	Upregulated
Lrrc39	leucine rich repeat containing 39	109245	0.00666942	1.25085	Upregulated
Adam12	a disintegrin and metallopeptidase domain 12 (meltrin alpha)	11489	0.00873356	1.24762	Upregulated
Dnajb2	DnaJ heat shock protein family (Hsp40) member B2	56812	0.00875839	1.24667	Upregulated
Rdh13	retinol dehydrogenase 13 (all-trans and 9-cis)	108841	0.00181335	1.23866	Upregulated
Neat1	nuclear paraspeckle assembly transcript 1 (non-protein coding)	66961	0.0386258	1.23764	Upregulated
Crem	cAMP responsive element modulator	12916	0.000851112	1.2248	Upregulated
Tpm4	tropomyosin 4	326618	0.00139592	1.22468	Upregulated
Fam50a	family with sequence similarity 50, member A	108160	0.00536375	1.22195	Upregulated
Trib3	tribbles pseudokinase 3	228775	0.0172084	1.21681	Upregulated
Pxdc1	PX domain containing 1	66895	0.0108323	1.20696	Upregulated
Ctr9	CTR9 homolog, Paf1/RNA polymerase II complex component	22083	0.00574645	1.19908	Upregulated
Sgms1	sphingomyelin synthase 1	208449	0.00679185	1.19808	Upregulated
Fnip1	folliculin interacting protein 1	216742	0.00191158	1.18837	Upregulated
Golga4	golgi autoantigen, golgin subfamily a, 4	54214	0.0100458	1.1855	Upregulated
Ergic1	endoplasmic reticulum-golgi intermediate compartment (ERGIC) 1	67458	0.0140358	1.184	Upregulated
Speg	SPEG complex locus	11790	0.0266622	1.17594	Upregulated
Hsp90ab1	heat shock protein 90 alpha (cytosolic), class B member 1	15516	0.00623274	1.16867	Upregulated
B4galt5	UDP-Gal:betaGlcNAc beta 1,4-galactosyltransferase, polypeptide 5	56336	0.0150377	1.16626	Upregulated
Smcr8	Smith-Magenis syndrome chromosome region, candidate 8 homolog (human)	237782	0.0101193	1.16252	Upregulated
Ppp2r2d	protein phosphatase 2, regulatory subunit B, delta	52432	0.00678198	1.1613	Upregulated
Lrrn4cl	LRRN4 C-terminal like	68852	0.0111577	1.15455	Upregulated
G3bp2	GTPase activating protein (SH3 domain) binding protein 2	23881	0.015821	1.15411	Upregulated
Pmp22	peripheral myelin protein 22	18858	0.0221334	1.15164	Upregulated
Flcn	folliculin	216805	0.00343583	1.14722	Upregulated
Zfp655	zinc finger protein 655	72611	0.00976814	1.14548	Upregulated
Atg13	autophagy related 13	51897	0.00567564	1.13617	Upregulated
Srxn1	sulfiredoxin 1 homolog (S. cerevisiae)	76650	0.00808077	1.12725	Upregulated
Ucp1	uncoupling protein 1 (mitochondrial, proton carrier)	22227	0.013662	1.12628	Upregulated
Atp1b1	ATPase, Na+/K+ transporting, beta 1 polypeptide	11931	0.0110267	1.12488	Upregulated
Tinagl1	tubulointerstitial nephritis antigen-like 1	94242	0.0307488	1.1234	Upregulated
Map3k8	mitogen-activated protein kinase kinase kinase 8	26410	0.00524986	1.11867	Upregulated
Pip5k1a	phosphatidylinositol-4-phosphate 5-kinase, type 1 alpha	18720	0.0218151	1.11331	Upregulated
Pak1ip1	PAK1 interacting protein 1	68083	0.0034577	1.10935	Upregulated
Gpam	glycerol-3-phosphate acyltransferase, mitochondrial	14732	0.00508199	1.10237	Upregulated
Tmem251	transmembrane protein 251	320351	0.00279122	1.09836	Upregulated
Wdr73	WD repeat domain 73	71968	0.0138365	1.09788	Upregulated
Stip1	stress-induced phosphoprotein 1	20867	0.0100918	1.09722	Upregulated
Adcy3	adenylate cyclase 3	104111	0.0329828	1.0887	Upregulated
Jmjd6	jumonji domain containing 6	107817	0.00339289	1.0882	Upregulated
Eya3	EYA transcriptional coactivator and phosphatase 3	14050	0.0009762	1.08486	Upregulated
Ctla2a	cytotoxic T lymphocyte-associated protein 2 alpha	13024	0.0168407	1.08282	Upregulated
Etf1	eukaryotic translation termination factor 1	225363	0.00690881	1.07629	Upregulated
Pnrc1	proline-rich nuclear receptor coactivator 1	108767	0.015497	1.07211	Upregulated
Utp14a	UTP14A small subunit processome component	72554	0.00335762	1.0705	Upregulated
Phf10	PHD finger protein 10	72057	0.0381447	1.06434	Upregulated
Psat1	phosphoserine aminotransferase 1	107272	0.0066731	1.06229	Upregulated
Fbxo34	F-box protein 34	78938	0.00403712	1.06161	Upregulated
Gapdh	glyceraldehyde-3-phosphate dehydrogenase	14433	0.0120842	1.06088	Upregulated
Pde4b	phosphodiesterase 4B, cAMP specific	18578	0.00516088	1.05608	Upregulated
Cdv3	carnitine deficiency-associated gene expressed in ventricle 3	321022	0.00291031	1.05209	Upregulated
Anxa3	annexin A3	11745	0.00724974	1.05187	Upregulated
Atf6	activating transcription factor 6	226641	0.013975	1.04929	Upregulated
Ndel1	nudE neurodevelopment protein 1 like 1	83431	0.00240811	1.04683	Upregulated
Lamb1	laminin B1	16777	0.0145789	1.0464	Upregulated
Coq10b	coenzyme Q10B	67876	0.0110285	1.04099	Upregulated
Lncpint	long non-protein coding RNA, Trp53 induced transcript	232685	0.0193474	1.03691	Upregulated
Gabarapl1	gamma-aminobutyric acid (GABA) A receptor-associated protein-like 1	57436	0.0294494	1.03548	Upregulated
Emp1	epithelial membrane protein 1	13730	0.00453845	1.03528	Upregulated
Siah2	siah E3 ubiquitin protein ligase 2	20439	0.0165136	1.03373	Upregulated
Zwint	ZW10 interactor	52696	0.0173876	1.03066	Upregulated
Nars	asparaginyl-tRNA synthetase	70223	0.00400095	1.02938	Upregulated
Rabgef1	RAB guanine nucleotide exchange factor (GEF) 1	56715	0.0242283	1.02843	Upregulated
Ppif	peptidylprolyl isomerase F (cyclophilin F)	105675	0.00578706	1.02128	Upregulated
Mbnl1	muscleblind like splicing factor 1	56758	0.00959905	1.01825	Upregulated
Ric8b	RIC8 guanine nucleotide exchange factor B	237422	0.0146208	1.01499	Upregulated
Lysmd3	LysM, putative peptidoglycan-binding, domain containing 3	80289	0.0029748	1.00789	Upregulated
Ctnna1	catenin (cadherin associated protein), alpha 1	12385	0.00890776	1.00752	Upregulated
Rragd	Ras-related GTP binding D	52187	0.0109882	1.00428	Upregulated
Aspa	aspartoacylase	11484	0.0116926	0.999486	Upregulated
Rnf113a2	ring finger protein 113A2	66381	0.0476971	0.997623	Upregulated
Sema3f	sema domain, immunoglobulin domain (Ig), short basic domain, secreted, (semaphorin) 3F	20350	0.0139195	0.996497	Upregulated
Utp14b	UTP14B small subunit processome component	195434	0.0291236	0.996255	Upregulated
Hspe1	heat shock protein 1 (chaperonin 10)	15528	0.0126845	0.989892	Upregulated
Cct3	chaperonin containing Tcp1, subunit 3 (gamma)	12462	0.0121243	0.987894	Upregulated
Stam	signal transducing adaptor molecule (SH3 domain and ITAM motif) 1	20844	0.0044935	0.986161	Upregulated
Nop58	NOP58 ribonucleoprotein	55989	0.0187209	0.985186	Upregulated
Eprs	glutamyl-prolyl-tRNA synthetase	107508	0.00600812	0.984013	Upregulated
Them4	thioesterase superfamily member 4	75778	0.00978693	0.978468	Upregulated
Synpo	synaptopodin	104027	0.0245318	0.977714	Upregulated
Csrnp1	cysteine-serine-rich nuclear protein 1	215418	0.0378018	0.975161	Upregulated
Parm1	prostate androgen-regulated mucin-like protein 1	231440	0.0327242	0.973842	Upregulated
Mbnl2	muscleblind like splicing factor 2	105559	0.00468719	0.973383	Upregulated
Col7a1	collagen, type VII, alpha 1	12836	0.0315121	0.973025	Upregulated
Mafk	v-maf musculoaponeurotic fibrosarcoma oncogene family, protein K (avian)	17135	0.0371291	0.971319	Upregulated
Ptpn23	protein tyrosine phosphatase, non-receptor type 23	104831	0.0153297	0.970509	Upregulated
Zfp691	zinc finger protein 691	195522	0.00482425	0.969422	Upregulated
Mob1b	MOB kinase activator 1B	68473	0.00745045	0.968374	Upregulated
Tbpl1	TATA box binding protein-like 1	237336	0.00540142	0.966455	Upregulated
Plpp1	phospholipid phosphatase 1	19012	0.0142683	0.965668	Upregulated
Chchd4	coiled-coil-helix-coiled-coil-helix domain containing 4	72170	0.0148329	0.964209	Upregulated
Tceal9	transcription elongation factor A like 9	22381	0.00726915	0.962557	Upregulated
Trib1	tribbles pseudokinase 1	211770	0.0394876	0.958162	Upregulated
Zfp27	zinc finger protein 27	22689	0.0117508	0.953899	Upregulated
Ipmk	inositol polyphosphate multikinase	69718	0.0462704	0.952568	Upregulated
Epha2	Eph receptor A2	13836	0.017208	0.949252	Upregulated
Picalm	phosphatidylinositol binding clathrin assembly protein	233489	0.00678322	0.948278	Upregulated
Ccnl1	cyclin L1	56706	0.0144112	0.948002	Upregulated
Lamtor3	late endosomal/lysosomal adaptor, MAPK and MTOR activator 3	56692	0.00746106	0.947402	Upregulated
Dnaja2	DnaJ heat shock protein family (Hsp40) member A2	56445	0.0029367	0.946865	Upregulated
Lpl	lipoprotein lipase	16956	0.0217141	0.945734	Upregulated
Adamts9	a disintegrin-like and metallopeptidase (reprolysin type) with thrombospondin type 1 motif, 9	101401	0.0158003	0.94314	Upregulated
Nop14	NOP14 nucleolar protein	75416	0.0288388	0.942396	Upregulated
Fbxo30	F-box protein 30	71865	0.0122774	0.9374	Upregulated
Slc25a25	solute carrier family 25 (mitochondrial carrier, phosphate carrier), member 25	227731	0.0267809	0.93466	Upregulated
Hspa4	heat shock protein 4	15525	0.00693711	0.934095	Upregulated
Rpp38	ribonuclease P/MRP 38 subunit	227522	0.00901976	0.933149	Upregulated
Rhoc	ras homolog family member C	11853	0.0170908	0.925618	Upregulated
Dync1li1	dynein cytoplasmic 1 light intermediate chain 1	235661	0.0092924	0.925266	Upregulated
Pappa	pregnancy-associated plasma protein A	18491	0.0466555	0.922077	Upregulated
Uba5	ubiquitin-like modifier activating enzyme 5	66663	0.00812644	0.922072	Upregulated
Sh3bp5	SH3-domain binding protein 5 (BTK-associated)	24056	0.0078059	0.921805	Upregulated
Rrp12	ribosomal RNA processing 12 homolog (S. cerevisiae)	107094	0.0129952	0.921486	Upregulated
Hk2	hexokinase 2	15277	0.0105576	0.921457	Upregulated
Adam17	a disintegrin and metallopeptidase domain 17	11491	0.00646393	0.920967	Upregulated
Tubb2a	tubulin, beta 2A class IIA	22151	0.0139983	0.91733	Upregulated
Morf4l2	mortality factor 4 like 2	56397	0.00784727	0.914427	Upregulated
Ier2	immediate early response 2	15936	0.00980256	0.913587	Upregulated
Lrrc20	leucine rich repeat containing 20	216011	0.00898914	0.913573	Upregulated
Kin	Kin17 DNA and RNA binding protein	16588	0.00723895	0.913477	Upregulated
Vegfa	vascular endothelial growth factor A	22339	0.0142303	0.911356	Upregulated
Hdc	histidine decarboxylase	15186	0.0207178	0.910246	Upregulated
Ncoa1	nuclear receptor coactivator 1	17977	0.00418055	0.909722	Upregulated
Aff4	AF4/FMR2 family, member 4	93736	0.00694295	0.903517	Upregulated
Kctd9	potassium channel tetramerisation domain containing 9	105440	0.00899331	0.902081	Upregulated
Kctd12	potassium channel tetramerisation domain containing 12	239217	0.0412711	0.902063	Upregulated
Gtf2h1	general transcription factor II H, polypeptide 1	14884	0.0100148	0.901043	Upregulated
Tex2	testis expressed gene 2	21763	0.0143985	0.900988	Upregulated
Hmgcr	3-hydroxy-3-methylglutaryl-Coenzyme A reductase	15357	0.00656333	0.899441	Upregulated
Man2a1	mannosidase 2, alpha 1	17158	0.038106	0.896986	Upregulated
Atg12	autophagy related 12	67526	0.0159128	0.896967	Upregulated
Ing3	inhibitor of growth family, member 3	71777	0.00606981	0.893064	Upregulated
Lcmt2	leucine carboxyl methyltransferase 2	329504	0.00619366	0.892564	Upregulated
Ubxn4	UBX domain protein 4	67812	0.00727894	0.892525	Upregulated
Rbm47	RNA binding motif protein 47	245945	0.0467654	0.890663	Upregulated
Hsd17b12	hydroxysteroid (17-beta) dehydrogenase 12	56348	0.0145361	0.886565	Upregulated
Taf7	TATA-box binding protein associated factor 7	24074	0.00181869	0.885719	Upregulated
Sar1b	secretion associated Ras related GTPase 1B	66397	0.0252356	0.88546	Upregulated
Psmc2	proteasome (prosome, macropain) 26S subunit, ATPase 2	19181	0.00605071	0.885449	Upregulated
Tatdn2	TatD DNase domain containing 2	381801	0.00843607	0.884905	Upregulated
Col4a1	collagen, type IV, alpha 1	12826	0.0367409	0.883719	Upregulated
Rnmt	RNA (guanine-7-) methyltransferase	67897	0.00556651	0.883221	Upregulated
Mga	MAX gene associated	29808	0.0188386	0.880874	Upregulated
Fxr1	fragile X mental retardation gene 1, autosomal homolog	14359	0.00780043	0.880751	Upregulated
Adnp2	ADNP homeobox 2	240442	0.0237525	0.880272	Upregulated
Rheb	Ras homolog enriched in brain	19744	0.00553341	0.880186	Upregulated
Nedd9	neural precursor cell expressed, developmentally down-regulated gene 9	18003	0.0319482	0.87847	Upregulated
Rnf185	ring finger protein 185	193670	0.00384584	0.87137	Upregulated
Gna13	guanine nucleotide binding protein, alpha 13	14674	0.00855099	0.869225	Upregulated
Cnnm2	cyclin M2	94219	0.0204557	0.868911	Upregulated
Jund	jun D proto-oncogene	16478	0.0417095	0.868785	Upregulated
Tbc1d9	TBC1 domain family, member 9	71310	0.0142845	0.868192	Upregulated
Aars	alanyl-tRNA synthetase	234734	0.00951967	0.865489	Upregulated
Plaa	phospholipase A2, activating protein	18786	0.013376	0.863594	Upregulated
Hopx	HOP homeobox	74318	0.0398732	0.859665	Upregulated
Sgpl1	sphingosine phosphate lyase 1	20397	0.0218075	0.859534	Upregulated
Trak2	trafficking protein, kinesin binding 2	70827	0.0159931	0.858883	Upregulated
Sars	seryl-aminoacyl-tRNA synthetase	20226	0.00918727	0.857627	Upregulated
Rab1a	RAB1A, member RAS oncogene family	19324	0.00392863	0.85738	Upregulated
Lrrfip2	leucine rich repeat (in FLII) interacting protein 2	71268	0.0137455	0.854959	Upregulated
Ube2b	ubiquitin-conjugating enzyme E2B	22210	0.0131222	0.854525	Upregulated
Tbc1d15	TBC1 domain family, member 15	66687	0.0194296	0.852098	Upregulated
Ankrd33b	ankyrin repeat domain 33B	67434	0.0179022	0.851805	Upregulated
Tob1	transducer of ErbB-2.1	22057	0.0341498	0.850627	Upregulated
Elmod2	ELMO/CED-12 domain containing 2	244548	0.0201679	0.849127	Upregulated
Rb1cc1	RB1-inducible coiled-coil 1	12421	0.0173609	0.847134	Upregulated
Cav1	caveolin 1, caveolae protein	12389	0.00577742	0.846604	Upregulated
Noc3l	NOC3 like DNA replication regulator	57753	0.0124332	0.845429	Upregulated
Chkb	choline kinase beta	12651	0.0142186	0.844451	Upregulated
Snhg1	small nucleolar RNA host gene 1	83673	0.0281185	0.843668	Upregulated
Msantd4	Myb/SANT-like DNA-binding domain containing 4 with coiled-coils	78100	0.0161255	0.840758	Upregulated
2410006H16Rik	RIKEN cDNA 2410006H16 gene	69221	0.0156269	0.838926	Upregulated
Elavl1	ELAV (embryonic lethal, abnormal vision)-like 1 (Hu antigen R)	15568	0.00409081	0.837499	Upregulated
Ranbp2	RAN binding protein 2	19386	0.0110969	0.835625	Upregulated
Hacd2	3-hydroxyacyl-CoA dehydratase 2	70757	0.0373911	0.835425	Upregulated
Cebpz	CCAAT/enhancer binding protein zeta	12607	0.0142427	0.835048	Upregulated
Map2k3	mitogen-activated protein kinase kinase 3	26397	0.0110655	0.834106	Upregulated
Mrpl47	mitochondrial ribosomal protein L47	74600	0.014473	0.83371	Upregulated
Psma1	proteasome subunit alpha 1	26440	0.0115603	0.83371	Upregulated
Zc3h15	zinc finger CCCH-type containing 15	69082	0.00705868	0.833113	Upregulated
Tmx4	thioredoxin-related transmembrane protein 4	52837	0.0167013	0.831416	Upregulated
Ly6a	lymphocyte antigen 6 complex, locus A	110454	0.0194375	0.830503	Upregulated
Gimap4	GTPase, IMAP family member 4	107526	0.0297286	0.830123	Upregulated
Dnttip2	deoxynucleotidyltransferase, terminal, interacting protein 2	99480	0.0118295	0.829575	Upregulated
Usp16	ubiquitin specific peptidase 16	74112	0.00856704	0.827936	Upregulated
Timm9	translocase of inner mitochondrial membrane 9	30056	0.0189857	0.827873	Upregulated
Cfap69	cilia and flagella associated protein 69	207686	0.00995776	0.823413	Upregulated
Cdo1	cysteine dioxygenase 1, cytosolic	12583	0.03928	0.821037	Upregulated
Tgif1	TGFB-induced factor homeobox 1	21815	0.0464286	0.820651	Upregulated
Nop2	NOP2 nucleolar protein	110109	0.0491812	0.816042	Upregulated
Slc25a24	solute carrier family 25 (mitochondrial carrier, phosphate carrier), member 24	229731	0.0106399	0.8151	Upregulated
Iars	isoleucine-tRNA synthetase	105148	0.0333581	0.80344	Upregulated
Eif2b3	eukaryotic translation initiation factor 2B, subunit 3	108067	0.0184837	0.803158	Upregulated
Copb1	coatomer protein complex, subunit beta 1	70349	0.00668342	0.801875	Upregulated
Rabggtb	Rab geranylgeranyl transferase, b subunit	19352	0.015412	0.801267	Upregulated
Fyn	Fyn proto-oncogene	14360	0.0367953	0.799497	Upregulated
Tlk2	tousled-like kinase 2 (Arabidopsis)	24086	0.00595738	0.799195	Upregulated
Arhgef12	Rho guanine nucleotide exchange factor (GEF) 12	69632	0.0228612	0.798971	Upregulated
Aggf1	angiogenic factor with G patch and FHA domains 1	66549	0.0188866	0.798673	Upregulated
Sacm1l	SAC1 suppressor of actin mutations 1-like (yeast)	83493	0.00717741	0.795926	Upregulated
Fxyd5	FXYD domain-containing ion transport regulator 5	18301	0.0416417	0.795875	Upregulated
Ist1	increased sodium tolerance 1 homolog (yeast)	71955	0.00629913	0.795586	Upregulated
Ubc	ubiquitin C	22190	0.021948	0.795391	Upregulated
Mat2a	methionine adenosyltransferase II, alpha	232087	0.0229638	0.795308	Upregulated
Ltv1	LTV1 ribosome biogenesis factor	353258	0.0248702	0.794088	Upregulated
Txnl1	thioredoxin-like 1	53382	0.019293	0.793387	Upregulated
B430212C06Rik	RIKEN cDNA B430212C06 gene	338360	0.0130504	0.792751	Upregulated
Ctns	cystinosis, nephropathic	83429	0.0146726	0.791308	Upregulated
Zfp729b	zinc finger protein 729b	100416706	0.0325716	0.789606	Upregulated
Zfp787	zinc finger protein 787	67109	0.00517925	0.787964	Upregulated
Nfx1	nuclear transcription factor, X-box binding 1	74164	0.00950457	0.785912	Upregulated
Maea	macrophage erythroblast attacher	59003	0.0233271	0.785517	Upregulated
Ecscr	endothelial cell surface expressed chemotaxis and apoptosis regulator	68545	0.0239427	0.784566	Upregulated
Pcyt2	phosphate cytidylyltransferase 2, ethanolamine	68671	0.0453394	0.783287	Upregulated
Ipo7	importin 7	233726	0.0304448	0.781718	Upregulated
Tra2a	transformer 2 alpha	101214	0.00786829	0.781506	Upregulated
Atp6v1b2	ATPase, H+ transporting, lysosomal V1 subunit B2	11966	0.0151316	0.781325	Upregulated
Chd1	chromodomain helicase DNA binding protein 1	12648	0.0329824	0.780549	Upregulated
Gdap2	ganglioside-induced differentiation-associated-protein 2	14547	0.0240319	0.780064	Upregulated
Riok2	RIO kinase 2	67045	0.0159835	0.778505	Upregulated
Kdm3a	lysine (K)-specific demethylase 3A	104263	0.0282431	0.77843	Upregulated
Akr1b3	aldo-keto reductase family 1, member B3 (aldose reductase)	11677	0.0439892	0.778154	Upregulated
Pecam1	platelet/endothelial cell adhesion molecule 1	18613	0.020571	0.777433	Upregulated
Frrs1	ferric-chelate reductase 1	20321	0.0248448	0.777158	Upregulated
Utp3	UTP3 small subunit processome component	65961	0.0218008	0.774388	Upregulated
Ndufaf4	NADH:ubiquinone oxidoreductase complex assembly factor 4	68493	0.00661982	0.774338	Upregulated
B4galt1	UDP-Gal:betaGlcNAc beta 1,4- galactosyltransferase, polypeptide 1	14595	0.0134122	0.772541	Upregulated
Hspd1	heat shock protein 1 (chaperonin)	15510	0.0227942	0.771642	Upregulated
Ints10	integrator complex subunit 10	70885	0.0125393	0.770673	Upregulated
Emd	emerin	13726	0.045204	0.769848	Upregulated
Ccdc47	coiled-coil domain containing 47	67163	0.00871375	0.769385	Upregulated
Slc30a1	solute carrier family 30 (zinc transporter), member 1	22782	0.0148527	0.768393	Upregulated
Pls3	plastin 3 (T-isoform)	102866	0.0192026	0.768166	Upregulated
Pank1	pantothenate kinase 1	75735	0.0140045	0.767895	Upregulated
Zfp948	zinc finger protein 948	381066	0.0370826	0.764256	Upregulated
U2surp	U2 snRNP-associated SURP domain containing	67958	0.0181567	0.76256	Upregulated
Ppme1	protein phosphatase methylesterase 1	72590	0.00579911	0.762446	Upregulated
Chm	choroidermia (RAB escort protein 1)	12662	0.0110998	0.762271	Upregulated
Nsmce2	NSE2/MMS21 homolog, SMC5-SMC6 complex SUMO ligase	68501	0.0132671	0.760746	Upregulated
Rbm18	RNA binding motif protein 18	67889	0.00662923	0.760213	Upregulated
Luzp1	leucine zipper protein 1	269593	0.0117899	0.758933	Upregulated
Mphosph10	M-phase phosphoprotein 10 (U3 small nucleolar ribonucleoprotein)	67973	0.0124633	0.754783	Upregulated
Gys2	glycogen synthase 2	232493	0.0426257	0.752774	Upregulated
Arhgap27	Rho GTPase activating protein 27	544817	0.0496111	0.74898	Upregulated
Cables1	CDK5 and Abl enzyme substrate 1	63955	0.0250458	0.746975	Upregulated
Lims2	LIM and senescent cell antigen like domains 2	225341	0.015003	0.744394	Upregulated
Gja1	gap junction protein, alpha 1	14609	0.0226266	0.744386	Upregulated
Tmem185b	transmembrane protein 185B	226351	0.0120363	0.743789	Upregulated
Rbm7	RNA binding motif protein 7	67010	0.0167386	0.743659	Upregulated
Zfyve16	zinc finger, FYVE domain containing 16	218441	0.0126092	0.74352	Upregulated
Rnf4	ring finger protein 4	19822	0.0161338	0.743166	Upregulated
Rbbp8	retinoblastoma binding protein 8, endonuclease	225182	0.0096503	0.738962	Upregulated
Ik	IK cytokine	24010	0.017487	0.738733	Upregulated
Ppp1r8	protein phosphatase 1, regulatory subunit 8	100336	0.032298	0.737701	Upregulated
Vapa	vesicle-associated membrane protein, associated protein A	30960	0.00938458	0.737312	Upregulated
Rsl1d1	ribosomal L1 domain containing 1	66409	0.0329663	0.737187	Upregulated
Zfp51	zinc finger protein 51	22709	0.0116514	0.73494	Upregulated
Fam43a	family with sequence similarity 43, member A	224093	0.0455352	0.73225	Upregulated
Tes	testis derived transcript	21753	0.0216484	0.729971	Upregulated
Naa50	N(alpha)-acetyltransferase 50, NatE catalytic subunit	72117	0.014547	0.728459	Upregulated
Psmd11	proteasome (prosome, macropain) 26S subunit, non-ATPase, 11	69077	0.0264148	0.726466	Upregulated
Tmem11	transmembrane protein 11	216821	0.0162362	0.725861	Upregulated
Tuba1a	tubulin, alpha 1A	22142	0.0269466	0.725808	Upregulated
Ms4a6b	membrane-spanning 4-domains, subfamily A, member 6B	69774	0.0445142	0.722361	Upregulated
Eif2s2	eukaryotic translation initiation factor 2, subunit 2 (beta)	67204	0.0184892	0.721584	Upregulated
Elp5	elongator acetyltransferase complex subunit 5	54351	0.0467953	0.719918	Upregulated
Cdk13	cyclin-dependent kinase 13	69562	0.0261241	0.719243	Upregulated
Lrrfip1	leucine rich repeat (in FLII) interacting protein 1	16978	0.0197746	0.716751	Upregulated
Mospd1	motile sperm domain containing 1	70380	0.0448176	0.716548	Upregulated
Psmc4	proteasome (prosome, macropain) 26S subunit, ATPase, 4	23996	0.0377348	0.716467	Upregulated
Washc5	WASH complex subunit 5	223593	0.0081875	0.716289	Upregulated
Tox4	TOX high mobility group box family member 4	268741	0.0165489	0.716182	Upregulated
Cldnd1	claudin domain containing 1	224250	0.042638	0.713649	Upregulated
Arl8a	ADP-ribosylation factor-like 8A	68724	0.0379896	0.713565	Upregulated
Selenok	selenoprotein K	80795	0.047732	0.7135	Upregulated
Spring1	SREBF pathway regulator in golgi 1	76792	0.0203774	0.713264	Upregulated
Rbm8a	RNA binding motif protein 8a	60365	0.0163565	0.712789	Upregulated
Cnn3	calponin 3, acidic	71994	0.0380387	0.71218	Upregulated
Larp4	La ribonucleoprotein domain family, member 4	207214	0.0295751	0.711086	Upregulated
Tbk1	TANK-binding kinase 1	56480	0.0214384	0.710753	Upregulated
Cln8	CLN8 transmembrane ER and ERGIC protein	26889	0.00947295	0.710248	Upregulated
Rlf	rearranged L-myc fusion sequence	109263	0.0338898	0.710044	Upregulated
Cnih4	cornichon family AMPA receptor auxiliary protein 4	98417	0.0425867	0.707917	Upregulated
Mdn1	midasin AAA ATPase 1	100019	0.0340926	0.707726	Upregulated
Cln5	ceroid-lipofuscinosis, neuronal 5	211286	0.0132915	0.706233	Upregulated
Ptpn2	protein tyrosine phosphatase, non-receptor type 2	19255	0.0429208	0.704536	Upregulated
Cct4	chaperonin containing Tcp1, subunit 4 (delta)	12464	0.0293659	0.70376	Upregulated
Pdlim7	PDZ and LIM domain 7	67399	0.0333886	0.703266	Upregulated
Akirin1	akirin 1	68050	0.022218	0.701335	Upregulated
Ubap1	ubiquitin-associated protein 1	67123	0.0389975	0.701329	Upregulated
Wars	tryptophanyl-tRNA synthetase	22375	0.0209168	0.70006	Upregulated
Robo4	roundabout guidance receptor 4	74144	0.0416567	0.699882	Upregulated
Ctsz	cathepsin Z	64138	0.0493566	0.699408	Upregulated
Nmd3	NMD3 ribosome export adaptor	97112	0.0490113	0.698687	Upregulated
Mef2d	myocyte enhancer factor 2D	17261	0.0293934	0.695438	Upregulated
Atp6v1e1	ATPase, H+ transporting, lysosomal V1 subunit E1	11973	0.0220805	0.694226	Upregulated
Atp6v1d	ATPase, H+ transporting, lysosomal V1 subunit D	73834	0.048529	0.693923	Upregulated
Rnf6	ring finger protein (C3H2C3 type) 6	74132	0.0208635	0.693503	Upregulated
4931406C07Rik	RIKEN cDNA 4931406C07 gene	70984	0.017079	0.691324	Upregulated
Golph3	golgi phosphoprotein 3	66629	0.00726673	0.690558	Upregulated
Sec22b	SEC22 homolog B, vesicle trafficking protein	20333	0.0299674	0.69037	Upregulated
Tnfrsf1a	tumor necrosis factor receptor superfamily, member 1a	21937	0.0481477	0.690367	Upregulated
Pip4p1	phosphatidylinositol-4,5-bisphosphate 4-phosphatase 1	219024	0.0363795	0.690217	Upregulated
Pcbp1	poly(rC) binding protein 1	23983	0.0340828	0.686926	Upregulated
Pparg	peroxisome proliferator activated receptor gamma	19016	0.0162454	0.686793	Upregulated
Hnrnph2	heterogeneous nuclear ribonucleoprotein H2	56258	0.044142	0.686476	Upregulated
Ung	uracil DNA glycosylase	22256	0.0335992	0.686399	Upregulated
Tbcc	tubulin-specific chaperone C	72726	0.00562883	0.68631	Upregulated
Coprs	coordinator of PRMT5, differentiation stimulator	66423	0.0186724	0.685976	Upregulated
Tbc1d23	TBC1 domain family, member 23	67581	0.0123494	0.684577	Upregulated
Zfp639	zinc finger protein 639	67778	0.0138667	0.683751	Upregulated
Ascc3	activating signal cointegrator 1 complex subunit 3	77987	0.0241428	0.680699	Upregulated
Fam126b	family with sequence similarity 126, member B	213056	0.0459897	0.678788	Upregulated
Ncbp1	nuclear cap binding protein subunit 1	433702	0.0239089	0.677921	Upregulated
Phospho2	phosphatase, orphan 2	73373	0.0310581	0.677021	Upregulated
Dnajb4	DnaJ heat shock protein family (Hsp40) member B4	67035	0.0172293	0.675801	Upregulated
Wsb1	WD repeat and SOCS box-containing 1	78889	0.0275862	0.675322	Upregulated
Api5	apoptosis inhibitor 5	11800	0.0241327	0.674742	Upregulated
Bzw1	basic leucine zipper and W2 domains 1	66882	0.0250829	0.674575	Upregulated
Pfdn2	prefoldin 2	18637	0.0205651	0.673237	Upregulated
Dusp3	dual specificity phosphatase 3 (vaccinia virus phosphatase VH1-related)	72349	0.0442815	0.67258	Upregulated
Zfp110	zinc finger protein 110	65020	0.0459866	0.668294	Upregulated
Slc19a2	solute carrier family 19 (thiamine transporter), member 2	116914	0.0495654	0.666988	Upregulated
Nploc4	NPL4 homolog, ubiquitin recognition factor	217365	0.0251478	0.666671	Upregulated
Rars	arginyl-tRNA synthetase	104458	0.0180182	0.665552	Upregulated
Bod1l	biorientation of chromosomes in cell division 1-like	665775	0.0365309	0.665374	Upregulated
Psmd4	proteasome (prosome, macropain) 26S subunit, non-ATPase, 4	19185	0.0266101	0.665317	Upregulated
Usp14	ubiquitin specific peptidase 14	59025	0.0160738	0.663637	Upregulated
Dlg1	discs large MAGUK scaffold protein 1	13383	0.0183702	0.663462	Upregulated
Coa7	cytochrome c oxidase assembly factor 7	69893	0.0156552	0.662132	Upregulated
Nup98	nucleoporin 98	269966	0.0185304	0.66073	Upregulated
Nsfl1c	NSFL1 (p97) cofactor (p47)	386649	0.0221446	0.660682	Upregulated
Fastkd5	FAST kinase domains 5	380601	0.0405285	0.659387	Upregulated
Bcl10	B cell leukemia/lymphoma 10	12042	0.0222804	0.658921	Upregulated
Gtpbp4	GTP binding protein 4	69237	0.03299	0.658157	Upregulated
Phf5a	PHD finger protein 5A	68479	0.049783	0.658068	Upregulated
Mavs	mitochondrial antiviral signaling protein	228607	0.0179872	0.654788	Upregulated
Pbdc1	polysaccharide biosynthesis domain containing 1	67683	0.031826	0.653501	Upregulated
Txndc9	thioredoxin domain containing 9	98258	0.00956741	0.653014	Upregulated
Fam104a	family with sequence similarity 104, member A	28081	0.0360407	0.653007	Upregulated
Srfbp1	serum response factor binding protein 1	67222	0.0183359	0.652554	Upregulated
Exoc6b	exocyst complex component 6B	75914	0.0144485	0.65098	Upregulated
Med1	mediator complex subunit 1	19014	0.0338788	0.649657	Upregulated
Rad17	RAD17 checkpoint clamp loader component	19356	0.0280018	0.648076	Upregulated
Vcam1	vascular cell adhesion molecule 1	22329	0.0477434	0.646208	Upregulated
Scyl2	SCY1-like 2 (S. cerevisiae)	213326	0.0239227	0.64611	Upregulated
Cct8	chaperonin containing Tcp1, subunit 8 (theta)	12469	0.0189815	0.645839	Upregulated
Abcf3	ATP-binding cassette, sub-family F (GCN20), member 3	27406	0.0225588	0.645414	Upregulated
Nup50	nucleoporin 50	18141	0.0123229	0.644104	Upregulated
Rad23b	RAD23 homolog B, nucleotide excision repair protein	19359	0.0438668	0.643882	Upregulated
Tmem161b	transmembrane protein 161B	72745	0.030478	0.643872	Upregulated
Palld	palladin, cytoskeletal associated protein	72333	0.0319859	0.643175	Upregulated
Ints4	integrator complex subunit 4	101861	0.0289241	0.643093	Upregulated
Tmem65	transmembrane protein 65	74868	0.0296888	0.641823	Upregulated
Cstf2t	cleavage stimulation factor, 3' pre-RNA subunit 2, tau	83410	0.0176693	0.641673	Upregulated
Dgat1	diacylglycerol O-acyltransferase 1	13350	0.028205	0.641099	Upregulated
Kcmf1	potassium channel modulatory factor 1	74287	0.034595	0.640375	Upregulated
Thoc6	THO complex 6	386612	0.0393316	0.639172	Upregulated
Ing2	inhibitor of growth family, member 2	69260	0.0370053	0.638402	Upregulated
Supt6	SPT6, histone chaperone and transcription elongation factor	20926	0.0398507	0.636739	Upregulated
Pex13	peroxisomal biogenesis factor 13	72129	0.0161448	0.636377	Upregulated
Gab2	growth factor receptor bound protein 2-associated protein 2	14389	0.021178	0.633844	Upregulated
Clcn6	chloride channel, voltage-sensitive 6	26372	0.0367726	0.632721	Upregulated
Usp33	ubiquitin specific peptidase 33	170822	0.0245389	0.631948	Upregulated
Lmbrd1	LMBR1 domain containing 1	68421	0.0222604	0.631551	Upregulated
Spata5	spermatogenesis associated 5	57815	0.0198724	0.631406	Upregulated
Ap1g1	adaptor protein complex AP-1, gamma 1 subunit	11765	0.0148372	0.629573	Upregulated
Slu7	SLU7 splicing factor homolog (S. cerevisiae)	193116	0.0389806	0.627847	Upregulated
Zfp35	zinc finger protein 35	22694	0.0325235	0.627203	Upregulated
Ggnbp2	gametogenetin binding protein 2	217039	0.0220613	0.62711	Upregulated
Mtpap	mitochondrial poly(A) polymerase	67440	0.0108566	0.626682	Upregulated
Mcl1	myeloid cell leukemia sequence 1	17210	0.0440328	0.626036	Upregulated
Cdr2	cerebellar degeneration-related 2	12585	0.0436568	0.625974	Upregulated
Fastkd2	FAST kinase domains 2	75619	0.0387906	0.625556	Upregulated
Esf1	ESF1 nucleolar pre-rRNA processing protein homolog	66580	0.0294612	0.621638	Upregulated
Grpel2	GrpE-like 2, mitochondrial	17714	0.0351367	0.620411	Upregulated
Mir99ahg	Mir99a and Mirlet7c-1 host gene (non-protein coding)	77994	0.022393	-0.621187	Downregulated
Galnt7	polypeptide N-acetylgalactosaminyltransferase 7	108150	0.0253212	-0.621995	Downregulated
Rnf150	ring finger protein 150	330812	0.0380881	-0.622577	Downregulated
5730409E04Rik	RIKEN cDNA 5730409E04Rik gene	230757	0.0401603	-0.623376	Downregulated
Dpp3	dipeptidylpeptidase 3	75221	0.0127023	-0.624479	Downregulated
Pde5a	phosphodiesterase 5A, cGMP-specific	242202	0.0308148	-0.625585	Downregulated
Zkscan7	zinc finger with KRAB and SCAN domains 7	382118	0.0390683	-0.626774	Downregulated
Ralgds	ral guanine nucleotide dissociation stimulator	19730	0.0216936	-0.627421	Downregulated
Arrb1	arrestin, beta 1	109689	0.0313232	-0.627968	Downregulated
Zmat1	zinc finger, matrin type 1	215693	0.0302973	-0.634384	Downregulated
Hdac10	histone deacetylase 10	170787	0.039126	-0.634399	Downregulated
Neil1	nei endonuclease VIII-like 1 (E. coli)	72774	0.0212618	-0.635298	Downregulated
Rdh10	retinol dehydrogenase 10 (all-trans)	98711	0.0283691	-0.639404	Downregulated
Nrbp2	nuclear receptor binding protein 2	223649	0.047283	-0.640267	Downregulated
Pars2	prolyl-tRNA synthetase (mitochondrial)(putative)	230577	0.0319382	-0.640364	Downregulated
Slc25a16	solute carrier family 25 (mitochondrial carrier, Graves disease autoantigen), member 16	73132	0.0451032	-0.642649	Downregulated
Stoml1	stomatin-like 1	69106	0.0456863	-0.643238	Downregulated
Extl3	exostosin-like glycosyltransferase 3	54616	0.0288886	-0.643291	Downregulated
Ano1	anoctamin 1, calcium activated chloride channel	101772	0.0289332	-0.645388	Downregulated
Arhgef9	CDC42 guanine nucleotide exchange factor (GEF) 9	236915	0.0226053	-0.645649	Downregulated
Tro	trophinin	56191	0.0337884	-0.646956	Downregulated
Nim1k	NIM1 serine/threonine protein kinase	245269	0.0436746	-0.6478	Downregulated
Fbxl20	F-box and leucine-rich repeat protein 20	72194	0.0364949	-0.648855	Downregulated
Sesn3	sestrin 3	75747	0.0327791	-0.649492	Downregulated
Ppcdc	phosphopantothenoylcysteine decarboxylase	66812	0.021422	-0.651935	Downregulated
Tm7sf3	transmembrane 7 superfamily member 3	67623	0.0112273	-0.652027	Downregulated
Anks1	ankyrin repeat and SAM domain containing 1	224650	0.0371615	-0.652202	Downregulated
Rad9b	RAD9 checkpoint clamp component B	231724	0.0339347	-0.6538	Downregulated
Slc35b4	solute carrier family 35, member B4	58246	0.0371465	-0.655259	Downregulated
Cutc	cutC copper transporter	66388	0.0376203	-0.656675	Downregulated
Il10rb	interleukin 10 receptor, beta	16155	0.0221177	-0.657295	Downregulated
Smarca2	SWI/SNF related, matrix associated, actin dependent regulator of chromatin, subfamily a, member 2	67155	0.0261044	-0.657485	Downregulated
Dipk1a	divergent protein kinase domain 1A	67266	0.0218722	-0.659451	Downregulated
Ssx2ip	synovial sarcoma, X 2 interacting protein	99167	0.0439348	-0.660067	Downregulated
P3h4	prolyl 3-hydroxylase family member 4 (non-enzymatic)	66180	0.0182173	-0.66184	Downregulated
Nr2f2	nuclear receptor subfamily 2, group F, member 2	11819	0.0116445	-0.666222	Downregulated
Tcf7l2	transcription factor 7 like 2, T cell specific, HMG box	21416	0.0174583	-0.666467	Downregulated
Ssh3	slingshot protein phosphatase 3	245857	0.0352879	-0.667263	Downregulated
Ezh1	enhancer of zeste 1 polycomb repressive complex 2 subunit	14055	0.0251331	-0.670458	Downregulated
Letm2	leucine zipper-EF-hand containing transmembrane protein 2	270035	0.0306829	-0.672084	Downregulated
Spout1	SPOUT domain containing methyltransferase 1	227695	0.021266	-0.672362	Downregulated
BC025920	zinc finger protein pseudogene	268319	0.0175344	-0.672785	Downregulated
Kank1	KN motif and ankyrin repeat domains 1	107351	0.0159881	-0.673062	Downregulated
Manba	mannosidase, beta A, lysosomal	110173	0.0306116	-0.673334	Downregulated
Rbbp9	retinoblastoma binding protein 9, serine hydrolase	26450	0.024576	-0.673698	Downregulated
Zc3h4	zinc finger CCCH-type containing 4	330474	0.036026	-0.675052	Downregulated
Akt2	thymoma viral proto-oncogene 2	11652	0.0348307	-0.675197	Downregulated
Sipa1l1	signal-induced proliferation-associated 1 like 1	217692	0.0249222	-0.675356	Downregulated
Ptpdc1	protein tyrosine phosphatase domain containing 1	218232	0.0181419	-0.675442	Downregulated
Ppat	phosphoribosyl pyrophosphate amidotransferase	231327	0.017028	-0.678142	Downregulated
Npc1	NPC intracellular cholesterol transporter 1	18145	0.0487687	-0.679815	Downregulated
AW554918	expressed sequence AW554918	225289	0.0225393	-0.679819	Downregulated
Pla2g15	phospholipase A2, group XV	192654	0.0486216	-0.68163	Downregulated
Pradc1	protease-associated domain containing 1	73327	0.0456006	-0.682769	Downregulated
Scarb1	scavenger receptor class B, member 1	20778	0.0188773	-0.683296	Downregulated
Dtd2	D-tyrosyl-tRNA deacylase 2	328092	0.0114506	-0.683937	Downregulated
Dlg3	discs large MAGUK scaffold protein 3	53310	0.0326231	-0.685056	Downregulated
Ldb1	LIM domain binding 1	16825	0.0123891	-0.689369	Downregulated
Apex2	apurinic/apyrimidinic endonuclease 2	77622	0.0426155	-0.690638	Downregulated
Zfp267	zinc finger protein 267	241944	0.0237912	-0.691257	Downregulated
Trim12c	tripartite motif-containing 12C	319236	0.0354877	-0.691433	Downregulated
Camkk2	calcium/calmodulin-dependent protein kinase kinase 2, beta	207565	0.0332975	-0.692685	Downregulated
Gucy1a1	guanylate cyclase 1, soluble, alpha 1	60596	0.0252218	-0.693373	Downregulated
Rgmb	repulsive guidance molecule family member B	68799	0.0231228	-0.694693	Downregulated
Krt79	keratin 79	223917	0.034652	-0.69555	Downregulated
Fas	Fas (TNF receptor superfamily member 6)	14102	0.0146952	-0.696093	Downregulated
Dync2h1	dynein cytoplasmic 2 heavy chain 1	110350	0.0186822	-0.696329	Downregulated
Kctd12b	potassium channel tetramerisation domain containing 12b	207474	0.0341724	-0.697492	Downregulated
Mif4gd	MIF4G domain containing	69674	0.0105234	-0.698095	Downregulated
Neo1	neogenin	18007	0.0209934	-0.69856	Downregulated
Mzt2	mitotic spindle organizing protein 2	72083	0.0451331	-0.6994	Downregulated
Denn2b	DENN domain containing 2B	76954	0.0204336	-0.69949	Downregulated
LTO1	ABCE maturation factor	72284	0.00582652	-0.699707	Downregulated
Ctdsp2	CTD (carboxy-terminal domain, RNA polymerase II, polypeptide A) small phosphatase 2	52468	0.011123	-0.702765	Downregulated
Prox2	prospero homeobox 2	73422	0.0106514	-0.704885	Downregulated
Htra3	HtrA serine peptidase 3	78558	0.0418624	-0.705774	Downregulated
Abcb8	ATP-binding cassette, sub-family B (MDR/TAP), member 8	74610	0.0479979	-0.706341	Downregulated
Lrrn3	leucine rich repeat protein 3, neuronal	16981	0.0224708	-0.707195	Downregulated
Ncapd2	non-SMC condensin I complex, subunit D2	68298	0.0317899	-0.708019	Downregulated
Wdr19	WD repeat domain 19	213081	0.0410958	-0.710144	Downregulated
Myo10	myosin X	17909	0.0261037	-0.712826	Downregulated
Samd1	sterile alpha motif domain containing 1	666704	0.034763	-0.712865	Downregulated
Agfg2	ArfGAP with FG repeats 2	231801	0.0284735	-0.713222	Downregulated
Ncapd3	non-SMC condensin II complex, subunit D3	78658	0.0122983	-0.713243	Downregulated
Mphosph9	M-phase phosphoprotein 9	269702	0.0426537	-0.71363	Downregulated
Mcat	malonyl CoA:ACP acyltransferase (mitochondrial)	223722	0.0290227	-0.713874	Downregulated
Slc8b1	solute carrier family 8 (sodium/lithium/calcium exchanger), member B1	170756	0.0371829	-0.714975	Downregulated
Rfx5	regulatory factor X, 5 (influences HLA class II expression)	53970	0.0168679	-0.71581	Downregulated
Tfdp2	transcription factor Dp 2	211586	0.0142982	-0.717253	Downregulated
Ankrd26	ankyrin repeat domain 26	232339	0.0301266	-0.71792	Downregulated
Tmem189	transmembrane protein 189	407243	0.0278579	-0.718979	Downregulated
Cish	cytokine inducible SH2-containing protein	12700	0.0472484	-0.720533	Downregulated
Sulf2	sulfatase 2	72043	0.0304352	-0.721491	Downregulated
Sec14l4	SEC14-like lipid binding 4	103655	0.0487111	-0.721915	Downregulated
Notch2	notch 2	18129	0.0416456	-0.722551	Downregulated
Xrcc3	X-ray repair complementing defective repair in Chinese hamster cells 3	74335	0.0358317	-0.724105	Downregulated
Prrg1	proline rich Gla (G-carboxyglutamic acid) 1	546336	0.0232909	-0.725638	Downregulated
Cdkn1b	cyclin-dependent kinase inhibitor 1B	12576	0.0254449	-0.72706	Downregulated
Mcph1	microcephaly, primary autosomal recessive 1	244329	0.0438065	-0.728284	Downregulated
Zbtb7b	zinc finger and BTB domain containing 7B	22724	0.0201914	-0.728809	Downregulated
Vps26b	VPS26 retromer complex component B	69091	0.00915721	-0.729283	Downregulated
Gmppb	GDP-mannose pyrophosphorylase B	331026	0.036447	-0.730084	Downregulated
Fgfr1	fibroblast growth factor receptor 1	14182	0.0204249	-0.730815	Downregulated
Usp46	ubiquitin specific peptidase 46	69727	0.0218085	-0.732013	Downregulated
Gart	phosphoribosylglycinamide formyltransferase	14450	0.0328561	-0.733999	Downregulated
Atf7ip	activating transcription factor 7 interacting protein	54343	0.040746	-0.734477	Downregulated
Sipa1l3	signal-induced proliferation-associated 1 like 3	74206	0.045495	-0.736992	Downregulated
Elmod3	ELMO/CED-12 domain containing 3	232089	0.0310901	-0.737726	Downregulated
Cdk2	cyclin-dependent kinase 2	12566	0.00996561	-0.738147	Downregulated
Tceanc	transcription elongation factor A (SII) N-terminal and central domain containing	245695	0.0109442	-0.738415	Downregulated
Snx30	sorting nexin family member 30	209131	0.0351948	-0.740585	Downregulated
Rab34	RAB34, member RAS oncogene family	19376	0.00725568	-0.741044	Downregulated
Naprt	nicotinate phosphoribosyltransferase	223646	0.0327247	-0.742931	Downregulated
Kat2a	K(lysine) acetyltransferase 2A	14534	0.0410185	-0.745144	Downregulated
Pfkfb4	6-phosphofructo-2-kinase/fructose-2,6-biphosphatase 4	270198	0.0395003	-0.745631	Downregulated
Ago1	argonaute RISC catalytic subunit 1	236511	0.0132605	-0.745674	Downregulated
Mcm9	minichromosome maintenance 9 homologous recombination repair factor	71567	0.0144269	-0.745706	Downregulated
Faap100	Fanconi anemia core complex associated protein 100	71885	0.027555	-0.750362	Downregulated
Cbx5	chromobox 5	12419	0.012512	-0.751147	Downregulated
Ccdc69	coiled-coil domain containing 69	52570	0.0346932	-0.751328	Downregulated
Camsap3	calmodulin regulated spectrin-associated protein family, member 3	69697	0.0305967	-0.751338	Downregulated
Cpox	coproporphyrinogen oxidase	12892	0.047994	-0.75297	Downregulated
Tet3	tet methylcytosine dioxygenase 3	194388	0.0114619	-0.754041	Downregulated
Chd1l	chromodomain helicase DNA binding protein 1-like	68058	0.0100634	-0.755087	Downregulated
Sirt4	sirtuin 4	75387	0.0303756	-0.755379	Downregulated
Lix1l	Lix1-like	280411	0.0127155	-0.755454	Downregulated
Serinc5	serine incorporator 5	218442	0.0359692	-0.757742	Downregulated
Eppk1	epiplakin 1	223650	0.0214749	-0.758295	Downregulated
Gtf2i	general transcription factor II I	14886	0.0332134	-0.764339	Downregulated
Pnkd	paroxysmal nonkinesiogenic dyskinesia	56695	0.038361	-0.765805	Downregulated
Arid3a	AT rich interactive domain 3A (BRIGHT-like)	13496	0.0197479	-0.767656	Downregulated
Vamp1	vesicle-associated membrane protein 1	22317	0.0300703	-0.769615	Downregulated
Ptrh2	peptidyl-tRNA hydrolase 2	217057	0.0241799	-0.769965	Downregulated
Btbd8	BTB (POZ) domain containing 8	100503185	0.0452997	-0.769973	Downregulated
Miga2	mitoguardin 2	108958	0.0248823	-0.774836	Downregulated
Prdm9	PR domain containing 9	213389	0.0232094	-0.774886	Downregulated
Fam219b	family with sequence similarity 219, member B	78323	0.0181191	-0.775182	Downregulated
Kmt5c	lysine methyltransferase 5C	232811	0.0276298	-0.776885	Downregulated
Rab30	RAB30, member RAS oncogene family	75985	0.0270965	-0.779353	Downregulated
Sdccag8	serologically defined colon cancer antigen 8	76816	0.0444893	-0.780722	Downregulated
Epm2a	epilepsy, progressive myoclonic epilepsy, type 2 gene alpha	13853	0.0489258	-0.782209	Downregulated
Plcg1	phospholipase C, gamma 1	18803	0.0413117	-0.782401	Downregulated
Orai3	ORAI calcium release-activated calcium modulator 3	269999	0.00825892	-0.782503	Downregulated
Tirap	toll-interleukin 1 receptor (TIR) domain-containing adaptor protein	117149	0.0243598	-0.783174	Downregulated
Mtus1	mitochondrial tumor suppressor 1	102103	0.0453319	-0.784167	Downregulated
Setbp1	SET binding protein 1	240427	0.0183402	-0.786979	Downregulated
Vav2	vav 2 oncogene	22325	0.0169017	-0.788141	Downregulated
Cdc25a	cell division cycle 25A	12530	0.0355283	-0.789297	Downregulated
Zfp687	zinc finger protein 687	78266	0.0201521	-0.789577	Downregulated
Caprin2	caprin family member 2	232560	0.0209873	-0.790321	Downregulated
Nudt16	nudix (nucleoside diphosphate linked moiety X)-type motif 16	75686	0.0171353	-0.794649	Downregulated
Erbb3	erb-b2 receptor tyrosine kinase 3	13867	0.00943581	-0.795112	Downregulated
Zfp503	zinc finger protein 503	218820	0.0209112	-0.797161	Downregulated
C1rl	complement component 1, r subcomponent-like	232371	0.0298337	-0.797914	Downregulated
Arhgap32	Rho GTPase activating protein 32	330914	0.0434571	-0.798568	Downregulated
Lrig3	leucine-rich repeats and immunoglobulin-like domains 3	320398	0.03167	-0.800952	Downregulated
Dusp18	dual specificity phosphatase 18	75219	0.0313948	-0.801643	Downregulated
Prex2	phosphatidylinositol-3,4,5-trisphosphate-dependent Rac exchange factor 2	109294	0.030175	-0.801844	Downregulated
Scai	suppressor of cancer cell invasion	320271	0.0467591	-0.802981	Downregulated
Pbx1	pre B cell leukemia homeobox 1	18514	0.00121449	-0.804332	Downregulated
Mrm2	mitochondrial rRNA methyltransferase 2	68017	0.0130302	-0.804528	Downregulated
Cdnf	cerebral dopamine neurotrophic factor	227526	0.0291325	-0.804781	Downregulated
Zranb3	zinc finger, RAN-binding domain containing 3	226409	0.0200639	-0.805343	Downregulated
Zfp523	zinc finger protein 523	224656	0.0477942	-0.805918	Downregulated
Satb1	special AT-rich sequence binding protein 1	20230	0.049502	-0.807203	Downregulated
Ttc38	tetratricopeptide repeat domain 38	239570	0.0408511	-0.807696	Downregulated
Kdm2b	lysine (K)-specific demethylase 2B	30841	0.0143368	-0.808037	Downregulated
Twist1	twist basic helix-loop-helix transcription factor 1	22160	0.0200342	-0.809535	Downregulated
Lurap1	leucine rich adaptor protein 1	68075	0.0314368	-0.810442	Downregulated
Zbtb14	zinc finger and BTB domain containing 14	22666	0.0164331	-0.811716	Downregulated
Scn1b	sodium channel, voltage-gated, type I, beta	20266	0.0440337	-0.814398	Downregulated
Zfyve21	zinc finger, FYVE domain containing 21	68520	0.033399	-0.815162	Downregulated
Slc16a4	solute carrier family 16 (monocarboxylic acid transporters), member 4	229699	0.0399791	-0.816082	Downregulated
Tbc1d13	TBC1 domain family, member 13	70296	0.0256895	-0.816383	Downregulated
Gpd1l	glycerol-3-phosphate dehydrogenase 1-like	333433	0.00914569	-0.818105	Downregulated
Nudt22	nudix (nucleoside diphosphate linked moiety X)-type motif 22	68323	0.0278708	-0.818493	Downregulated
Med12l	mediator complex subunit 12-like	329650	0.0348993	-0.818624	Downregulated
Gpr155	G protein-coupled receptor 155	68526	0.0489777	-0.820111	Downregulated
Bbx	bobby sox HMG box containing	70508	0.0122556	-0.821196	Downregulated
Kctd15	potassium channel tetramerisation domain containing 15	233107	0.0300541	-0.821636	Downregulated
Msh6	mutS homolog 6	17688	0.0274703	-0.821762	Downregulated
Rab29	RAB29, member RAS oncogene family	226422	0.00815503	-0.823694	Downregulated
Fbxl19	F-box and leucine-rich repeat protein 19	233902	0.0396207	-0.82375	Downregulated
Tnip1	TNFAIP3 interacting protein 1	57783	0.044331	-0.82408	Downregulated
Prickle3	prickle planar cell polarity protein 3	54630	0.018558	-0.825997	Downregulated
Abcd4	ATP-binding cassette, sub-family D (ALD), member 4	19300	0.0388263	-0.830333	Downregulated
Mecom	MDS1 and EVI1 complex locus	14013	0.00931688	-0.832243	Downregulated
Dab2ip	disabled 2 interacting protein	69601	0.0239953	-0.834063	Downregulated
Pld2	phospholipase D2	18806	0.0396996	-0.83765	Downregulated
9530026P05Rik	RIKEN cDNA 9530026P05 gene	330385	0.0112429	-0.838155	Downregulated
Chrna2	cholinergic receptor, nicotinic, alpha polypeptide 2 (neuronal)	110902	0.0424294	-0.838728	Downregulated
Fzd1	frizzled class receptor 1	14362	0.00753796	-0.841035	Downregulated
Bcorl1	BCL6 co-repressor-like 1	320376	0.0344323	-0.843904	Downregulated
Hars2	histidyl-tRNA synthetase 2	70791	0.00979155	-0.844095	Downregulated
Plgrkt	plasminogen receptor, C-terminal lysine transmembrane protein	67759	0.038626	-0.844294	Downregulated
Lrrcc1	leucine rich repeat and coiled-coil domain containing 1	71710	0.0238959	-0.844755	Downregulated
Rcan3	regulator of calcineurin 3	53902	0.0374611	-0.845256	Downregulated
Ppl	periplakin	19041	0.0365438	-0.848037	Downregulated
Thnsl1	threonine synthase-like 1 (bacterial)	208967	0.0197765	-0.85111	Downregulated
Ddhd1	DDHD domain containing 1	114874	0.0166102	-0.853421	Downregulated
Cecr2	CECR2, histone acetyl-lysine reader	330409	0.0178658	-0.853775	Downregulated
Mlh3	mutL homolog 3	217716	0.0195887	-0.854235	Downregulated
Bace1	beta-site APP cleaving enzyme 1	23821	0.0148324	-0.854713	Downregulated
Fryl	FRY like transcription coactivator	72313	0.0338531	-0.856745	Downregulated
1110019D14Rik	RIKEN cDNA 1110019D14 gene	76311	0.0238388	-0.859092	Downregulated
Prkdc	protein kinase, DNA activated, catalytic polypeptide	19090	0.00771627	-0.859295	Downregulated
Tmem177	transmembrane protein 177	66343	0.0285009	-0.859386	Downregulated
Zfp964	zinc finger protein 964	636741	0.026587	-0.863367	Downregulated
Lrrc45	leucine rich repeat containing 45	217366	0.0422371	-0.865296	Downregulated
Cep192	centrosomal protein 192	70799	0.0310982	-0.866946	Downregulated
Fut8	fucosyltransferase 8	53618	0.0123317	-0.867979	Downregulated
Tango6	transport and golgi organization 6	272538	0.0315013	-0.870048	Downregulated
Cdc23	CDC23 cell division cycle 23	52563	0.01011	-0.872366	Downregulated
Abi2	abl-interactor 2	329165	0.0163169	-0.873023	Downregulated
Art3	ADP-ribosyltransferase 3	109979	0.0172781	-0.875479	Downregulated
Phlpp1	PH domain and leucine rich repeat protein phosphatase 1	98432	0.0293921	-0.878908	Downregulated
Phip	pleckstrin homology domain interacting protein	83946	0.0219182	-0.880231	Downregulated
Polr3g	polymerase (RNA) III (DNA directed) polypeptide G	67486	0.0173369	-0.882229	Downregulated
Parp16	poly (ADP-ribose) polymerase family, member 16	214424	0.0157171	-0.884824	Downregulated
Cers4	ceramide synthase 4	67260	0.0218645	-0.885036	Downregulated
Mri1	methylthioribose-1-phosphate isomerase 1	67873	0.0162102	-0.885491	Downregulated
Bbof1	basal body orientation factor 1	72873	0.0179192	-0.885792	Downregulated
B3galt2	UDP-Gal:betaGlcNAc beta 1,3-galactosyltransferase, polypeptide 2	26878	0.0295969	-0.886322	Downregulated
Txndc5	thioredoxin domain containing 5	105245	0.00587593	-0.890742	Downregulated
Dyrk1b	dual-specificity tyrosine-(Y)-phosphorylation regulated kinase 1b	13549	0.0297051	-0.893686	Downregulated
Sesn1	sestrin 1	140742	0.0426366	-0.89434	Downregulated
Zc3h6	zinc finger CCCH type containing 6	78751	0.0161767	-0.89647	Downregulated
Zfp783	zinc finger protein 783	232785	0.00561311	-0.898503	Downregulated
Zbtb5	zinc finger and BTB domain containing 5	230119	0.0103247	-0.901353	Downregulated
Mxd4	Max dimerization protein 4	17122	0.00485371	-0.901619	Downregulated
Zfp518b	zinc finger protein 518B	100515	0.0211968	-0.904374	Downregulated
Dtx2	deltex 2, E3 ubiquitin ligase	74198	0.0195993	-0.905008	Downregulated
Slc22a23	solute carrier family 22, member 23	73102	0.00496313	-0.909546	Downregulated
Pctp	phosphatidylcholine transfer protein	18559	0.0133612	-0.911081	Downregulated
Smarcd2	SWI/SNF related, matrix associated, actin dependent regulator of chromatin, subfamily d, member 2	83796	0.0159324	-0.914283	Downregulated
Dusp7	dual specificity phosphatase 7	235584	0.0285149	-0.914388	Downregulated
Stat5b	signal transducer and activator of transcription 5B	20851	0.0172347	-0.915115	Downregulated
Tia1	cytotoxic granule-associated RNA binding protein 1	21841	0.0248554	-0.916876	Downregulated
Ppp1r3c	protein phosphatase 1, regulatory subunit 3C	53412	0.0452485	-0.917376	Downregulated
Hmgcs2	3-hydroxy-3-methylglutaryl-Coenzyme A synthase 2	15360	0.0475437	-0.919925	Downregulated
Slc45a4	solute carrier family 45, member 4	106068	0.0168052	-0.92153	Downregulated
Parp9	poly (ADP-ribose) polymerase family, member 9	80285	0.0316685	-0.92202	Downregulated
Msh3	mutS homolog 3	17686	0.0101214	-0.9222	Downregulated
Zfp2	zinc finger protein 2	22678	0.00786884	-0.925583	Downregulated
Wee1	WEE 1 homolog 1 (S. pombe)	22390	0.0491174	-0.926644	Downregulated
Cyp4v3	cytochrome P450, family 4, subfamily v, polypeptide 3	102294	0.0345899	-0.927536	Downregulated
Acp6	acid phosphatase 6, lysophosphatidic	66659	0.00394194	-0.928061	Downregulated
Zfp423	zinc finger protein 423	94187	0.0392377	-0.934153	Downregulated
Adra1a	adrenergic receptor, alpha 1a	11549	0.0103104	-0.936883	Downregulated
Dhx34	DEAH (Asp-Glu-Ala-His) box polypeptide 34	71723	0.0251651	-0.937341	Downregulated
Hexim2	hexamethylene bis-acetamide inducible 2	71059	0.026902	-0.937813	Downregulated
Ninl	ninein-like	78177	0.0134837	-0.939643	Downregulated
Gm6878	predicted gene 6878	628416	0.0214588	-0.945593	Downregulated
Cxxc5	CXXC finger 5	67393	0.00692835	-0.945698	Downregulated
Pomt1	protein-O-mannosyltransferase 1	99011	0.0358269	-0.946616	Downregulated
Mideas	mitotic deacetylase associated SANT domain protein	238317	0.04062	-0.947507	Downregulated
Pigs	phosphatidylinositol glycan anchor biosynthesis, class S	276846	0.0151064	-0.947656	Downregulated
Marcks	myristoylated alanine rich protein kinase C substrate	17118	0.0227481	-0.948243	Downregulated
Plce1	phospholipase C, epsilon 1	74055	0.0267049	-0.951084	Downregulated
H6pd	hexose-6-phosphate dehydrogenase (glucose 1-dehydrogenase)	100198	0.0410242	-0.951512	Downregulated
Pik3r2	phosphoinositide-3-kinase regulatory subunit 2	18709	0.0132447	-0.951805	Downregulated
N4bp2l1	NEDD4 binding protein 2-like 1	100637	0.0213837	-0.960797	Downregulated
Klf10	Kruppel-like factor 10	21847	0.0200177	-0.962181	Downregulated
Ccnj	cyclin J	240665	0.00984783	-0.969215	Downregulated
L3mbtl3	L3MBTL3 histone methyl-lysine binding protein	237339	0.00275764	-0.970144	Downregulated
Tcta	T cell leukemia translocation altered gene	102791	0.00380604	-0.972745	Downregulated
Slc25a42	solute carrier family 25, member 42	73095	0.0448568	-0.973146	Downregulated
Cc2d2a	coiled-coil and C2 domain containing 2A	231214	0.0222264	-0.976776	Downregulated
Efna5	ephrin A5	13640	0.00667178	-0.978331	Downregulated
Tnks1bp1	tankyrase 1 binding protein 1	228140	0.014984	-0.978603	Downregulated
Amer1	APC membrane recruitment 1	72345	0.00799808	-0.978846	Downregulated
P2ry1	purinergic receptor P2Y, G-protein coupled 1	18441	0.0201817	-0.983611	Downregulated
Mid1ip1	Mid1 interacting protein 1 (gastrulation specific G12-like (zebrafish))	68041	0.00559195	-0.985014	Downregulated
Zfp810	zinc finger protein 810	235050	0.00430977	-0.992186	Downregulated
Mllt6	myeloid/lymphoid or mixed-lineage leukemia; translocated to, 6	246198	0.0194122	-0.994109	Downregulated
Eri2	exoribonuclease 2	71151	0.0294535	-0.995095	Downregulated
Zfp324	zinc finger protein 324	243834	0.0365855	-0.995146	Downregulated
Meis1	Meis homeobox 1	17268	0.00219007	-0.996115	Downregulated
Fzd4	frizzled class receptor 4	14366	0.0162346	-0.997658	Downregulated
Pfkfb1	6-phosphofructo-2-kinase/fructose-2,6-biphosphatase 1	18639	0.0285314	-1.00125	Downregulated
Cdkl5	cyclin-dependent kinase-like 5	382253	0.0312038	-1.00371	Downregulated
Gprc5c	G protein-coupled receptor, family C, group 5, member C	70355	0.00244193	-1.00548	Downregulated
Syt12	synaptotagmin XII	171180	0.0227909	-1.0063	Downregulated
Meis2	Meis homeobox 2	17536	0.000885065	-1.01108	Downregulated
Cspg4	chondroitin sulfate proteoglycan 4	121021	0.039546	-1.01163	Downregulated
Msh2	mutS homolog 2	17685	0.0193634	-1.01198	Downregulated
Ncoa7	nuclear receptor coactivator 7	211329	0.00509087	-1.01325	Downregulated
Fat1	FAT atypical cadherin 1	14107	0.0195924	-1.0151	Downregulated
Zeb2	zinc finger E-box binding homeobox 2	24136	0.00412496	-1.01525	Downregulated
N4bp2	NEDD4 binding protein 2	333789	0.00301589	-1.01537	Downregulated
Pex26	peroxisomal biogenesis factor 26	74043	0.0119423	-1.01538	Downregulated
Acad12	acyl-Coenzyme A dehydrogenase family, member 12	338350	0.0082108	-1.01734	Downregulated
Rin2	Ras and Rab interactor 2	74030	0.0226634	-1.0177	Downregulated
Uck1	uridine-cytidine kinase 1	22245	0.00144164	-1.02016	Downregulated
B3gntl1	UDP-GlcNAc:betaGal beta-1,3-N-acetylglucosaminyltransferase-like 1	210004	0.0190026	-1.02097	Downregulated
Cep164	centrosomal protein 164	214552	0.016816	-1.02112	Downregulated
Fcsk	fucose kinase	234730	0.00922929	-1.02476	Downregulated
Podn	podocan	242608	0.0383111	-1.02924	Downregulated
Hpgd	hydroxyprostaglandin dehydrogenase 15 (NAD)	15446	0.0201022	-1.02936	Downregulated
Mblac2	metallo-beta-lactamase domain containing 2	72852	0.0463231	-1.03164	Downregulated
Lrg1	leucine-rich alpha-2-glycoprotein 1	76905	0.0302181	-1.0318	Downregulated
Dcaf17	DDB1 and CUL4 associated factor 17	75763	0.0112102	-1.03608	Downregulated
Pomk	protein-O-mannose kinase	74653	0.0222511	-1.03878	Downregulated
Xbp1	X-box binding protein 1	22433	0.00257576	-1.04139	Downregulated
Syde2	synapse defective 1, Rho GTPase, homolog 2 (C. elegans)	214804	0.0239885	-1.04201	Downregulated
Rhobtb3	Rho-related BTB domain containing 3	73296	0.00432427	-1.05477	Downregulated
Pwwp3a	PWWP domain containing 3A, DNA repair factor	68114	0.0128724	-1.06109	Downregulated
Tbc1d2b	TBC1 domain family, member 2B	67016	0.011125	-1.0613	Downregulated
Myom3	myomesin family, member 3	242702	0.0305225	-1.06229	Downregulated
Ar	androgen receptor	11835	0.00545661	-1.06251	Downregulated
Chst12	carbohydrate sulfotransferase 12	59031	0.0133101	-1.06579	Downregulated
Slc16a7	solute carrier family 16 (monocarboxylic acid transporters), member 7	20503	0.0305659	-1.06948	Downregulated
Tspan4	tetraspanin 4	64540	0.0331407	-1.0748	Downregulated
Extl2	exostosin-like glycosyltransferase 2	58193	0.00264124	-1.07516	Downregulated
Cep78	centrosomal protein 78	208518	0.0145216	-1.07891	Downregulated
Plag1	pleiomorphic adenoma gene 1	56711	0.00109945	-1.08418	Downregulated
Tsku	tsukushi, small leucine rich proteoglycan	244152	0.0213514	-1.0896	Downregulated
Plekhg3	pleckstrin homology domain containing, family G (with RhoGef domain) member 3	263406	0.00757827	-1.0951	Downregulated
Itpk1	inositol 1,3,4-triphosphate 5/6 kinase	217837	0.0298769	-1.09599	Downregulated
Kank2	KN motif and ankyrin repeat domains 2	235041	0.0250522	-1.09782	Downregulated
Fam53b	family with sequence similarity 53, member B	77938	0.037139	-1.09839	Downregulated
Sox6	SRY (sex determining region Y)-box 6	20679	0.0225212	-1.10061	Downregulated
Osbpl5	oxysterol binding protein-like 5	79196	0.03317	-1.10387	Downregulated
Notch3	notch 3	18131	0.0179125	-1.10684	Downregulated
Gprin3	GPRIN family member 3	243385	0.0393834	-1.10743	Downregulated
Cdh2	cadherin 2	12558	0.00717225	-1.11067	Downregulated
Ptch1	patched 1	19206	0.00229764	-1.11242	Downregulated
Lgr4	leucine-rich repeat-containing G protein-coupled receptor 4	107515	0.00172384	-1.11384	Downregulated
Ltbp2	latent transforming growth factor beta binding protein 2	16997	0.00572107	-1.1153	Downregulated
Arpin	actin-related protein 2/3 complex inhibitor	70420	0.00471611	-1.11586	Downregulated
St3gal4	ST3 beta-galactoside alpha-2,3-sialyltransferase 4	20443	0.00873779	-1.11885	Downregulated
Zfp512b	zinc finger protein 512B	269401	0.00662078	-1.12025	Downregulated
Ppm1k	protein phosphatase 1K (PP2C domain containing)	243382	0.0362855	-1.12112	Downregulated
Car14	carbonic anhydrase 14	23831	0.0367127	-1.12141	Downregulated
Gab1	growth factor receptor bound protein 2-associated protein 1	14388	0.0184	-1.12172	Downregulated
Slc46a3	solute carrier family 46, member 3	71706	0.0164585	-1.12257	Downregulated
Zfp174	zinc finger protein 174	385674	0.00775071	-1.12459	Downregulated
Dennd11	DENN domain containing 11	243780	0.00810124	-1.12772	Downregulated
Slc37a4	solute carrier family 37 (glucose-6-phosphate transporter), member 4	14385	0.012625	-1.13237	Downregulated
Coq8a	coenzyme Q8A	67426	0.00835908	-1.13424	Downregulated
Tmem164	transmembrane protein 164	209497	0.00120188	-1.13762	Downregulated
Dram1	DNA-damage regulated autophagy modulator 1	71712	0.0117449	-1.13966	Downregulated
Tnk2	tyrosine kinase, non-receptor, 2	51789	0.0082793	-1.14752	Downregulated
Bivm	basic, immunoglobulin-like variable motif containing	246229	0.00377442	-1.1482	Downregulated
Sfxn2	sideroflexin 2	94279	0.00770436	-1.15057	Downregulated
Gatd1	glutamine amidotransferase like class 1 domain containing 1	213350	0.0214668	-1.15091	Downregulated
Dnajc28	DnaJ heat shock protein family (Hsp40) member C28	246738	0.00771961	-1.15459	Downregulated
Fzd7	frizzled class receptor 7	14369	0.00592716	-1.15699	Downregulated
Igsf8	immunoglobulin superfamily, member 8	140559	0.0129568	-1.15741	Downregulated
Hlf	hepatic leukemia factor	217082	0.0227439	-1.16078	Downregulated
Trps1	transcriptional repressor GATA binding 1	83925	0.0111496	-1.16086	Downregulated
Mpp2	membrane protein, palmitoylated 2 (MAGUK p55 subfamily member 2)	50997	0.0211126	-1.16845	Downregulated
Ebf2	early B cell factor 2	13592	0.00197091	-1.17618	Downregulated
Pygo1	pygopus 1	72135	0.0246157	-1.17745	Downregulated
Fgfr2	fibroblast growth factor receptor 2	14183	0.0301479	-1.17877	Downregulated
Rad51d	RAD51 paralog D	19364	0.00513995	-1.18267	Downregulated
Slc22a3	solute carrier family 22 (organic cation transporter), member 3	20519	0.0211536	-1.19483	Downregulated
Cdon	cell adhesion molecule-related/down-regulated by oncogenes	57810	0.0211712	-1.19645	Downregulated
Cad	carbamoyl-phosphate synthetase 2, aspartate transcarbamylase, and dihydroorotase	69719	0.00718936	-1.20165	Downregulated
Lrp12	low density lipoprotein-related protein 12	239393	0.00255786	-1.20169	Downregulated
Iffo2	intermediate filament family orphan 2	212632	0.00318645	-1.20971	Downregulated
G0s2	G0/G1 switch gene 2	14373	0.0138766	-1.21125	Downregulated
Naa80	N(alpha)-acetyltransferase 80, NatH catalytic subunit	56441	0.00523293	-1.21342	Downregulated
Ankef1	ankyrin repeat and EF-hand domain containing 1	319196	0.0183481	-1.22034	Downregulated
Arhgef40	Rho guanine nucleotide exchange factor (GEF) 40	268739	0.0182912	-1.22488	Downregulated
Tor4a	torsin family 4, member A	227612	0.00284393	-1.22627	Downregulated
Rbfox2	RNA binding protein, fox-1 homolog (C. elegans) 2	93686	0.0127536	-1.22652	Downregulated
Napepld	N-acyl phosphatidylethanolamine phospholipase D	242864	0.00943422	-1.23573	Downregulated
Zmym3	zinc finger, MYM-type 3	56364	0.00383425	-1.23907	Downregulated
Mtmr14	myotubularin related protein 14	97287	0.018229	-1.24617	Downregulated
Itga7	integrin alpha 7	16404	0.00624181	-1.25019	Downregulated
Cntnap1	contactin associated protein-like 1	53321	0.0272194	-1.25071	Downregulated
Cd200	CD200 antigen	17470	0.0234746	-1.25528	Downregulated
Entpd6	ectonucleoside triphosphate diphosphohydrolase 6	12497	0.00343708	-1.26104	Downregulated
Frat1	frequently rearranged in advanced T cell lymphomas	14296	0.0125306	-1.26582	Downregulated
C920006O11Rik	RIKEN cDNA C920006O11 gene	320295	0.0154633	-1.26589	Downregulated
Lama4	laminin, alpha 4	16775	0.00171564	-1.27064	Downregulated
Zfp185	zinc finger protein 185	22673	0.0401191	-1.29014	Downregulated
P2ry14	purinergic receptor P2Y, G-protein coupled, 14	140795	0.0157936	-1.29189	Downregulated
A830018L16Rik	RIKEN cDNA A830018L16 gene	320492	0.0461645	-1.29632	Downregulated
Klhl42	kelch-like 42	232539	0.00143512	-1.30718	Downregulated
Igf1	insulin-like growth factor 1	16000	0.0401962	-1.32694	Downregulated
Lrig1	leucine-rich repeats and immunoglobulin-like domains 1	16206	0.00522097	-1.33868	Downregulated
Fam13a	family with sequence similarity 13, member A	58909	0.0394495	-1.34119	Downregulated
Hyal1	hyaluronoglucosaminidase 1	15586	0.0206888	-1.3463	Downregulated
Pxdn	peroxidasin	69675	0.000988446	-1.36897	Downregulated
Ahdc1	AT hook, DNA binding motif, containing 1	230793	0.00843437	-1.37654	Downregulated
Marveld1	MARVEL (membrane-associating) domain containing 1	277010	0.00214439	-1.38108	Downregulated
Spsb1	splA/ryanodine receptor domain and SOCS box containing 1	74646	0.0104765	-1.38327	Downregulated
Jag1	jagged 1	16449	0.00640381	-1.3844	Downregulated
Cdkn2c	cyclin dependent kinase inhibitor 2C	12580	0.00849347	-1.39994	Downregulated
Slc1a5	solute carrier family 1 (neutral amino acid transporter), member 5	20514	0.0101612	-1.4132	Downregulated
Ppp1r3d	protein phosphatase 1, regulatory subunit 3D	228966	0.0131048	-1.42302	Downregulated
Igfals	insulin-like growth factor binding protein, acid labile subunit	16005	0.0109302	-1.42477	Downregulated
Sspn	sarcospan	16651	0.00728179	-1.43739	Downregulated
Epn2	epsin 2	13855	0.00161187	-1.44149	Downregulated
Gypc	glycophorin C	71683	0.0227978	-1.44574	Downregulated
Svep1	sushi, von Willebrand factor type A, EGF and pentraxin domain containing 1	64817	0.035877	-1.46172	Downregulated
Rps6ka5	ribosomal protein S6 kinase, polypeptide 5	73086	0.00294333	-1.4621	Downregulated
Fam217b	family with sequence similarity 217, member B	71532	0.00279986	-1.46585	Downregulated
Apol6	apolipoprotein L 6	71939	0.00230239	-1.46716	Downregulated
Zfhx4	zinc finger homeodomain 4	80892	0.000771297	-1.48427	Downregulated
Angpt1	angiopoietin 1	11600	0.0191759	-1.4868	Downregulated
Ampd2	adenosine monophosphate deaminase 2	109674	0.00400412	-1.48953	Downregulated
Myorg	myogenesis regulating glycosidase (putative)	329828	0.00373165	-1.50841	Downregulated
Nr3c2	nuclear receptor subfamily 3, group C, member 2	110784	0.00399596	-1.54527	Downregulated
Aatk	apoptosis-associated tyrosine kinase	11302	0.00446614	-1.5467	Downregulated
Dgat2	diacylglycerol O-acyltransferase 2	67800	0.00103398	-1.56065	Downregulated
Gramd1b	GRAM domain containing 1B	235283	0.0348148	-1.57048	Downregulated
P2rx5	purinergic receptor P2X, ligand-gated ion channel, 5	94045	0.0123981	-1.57124	Downregulated
Cdk6	cyclin-dependent kinase 6	12571	0.00751719	-1.59449	Downregulated
Chst15	carbohydrate sulfotransferase 15	77590	0.00815874	-1.59828	Downregulated
Tmem131l	transmembrane 131 like	229473	0.00254991	-1.62897	Downregulated
Sh3pxd2a	SH3 and PX domains 2A	14218	0.00870979	-1.64307	Downregulated
Wdr6	WD repeat domain 6	83669	0.00654255	-1.66397	Downregulated
Trarg1	trafficking regulator of GLUT4 (SLC2A4) 1	237858	0.00527207	-1.67966	Downregulated
Bcl7a	B cell CLL/lymphoma 7A	77045	0.00294908	-1.69425	Downregulated
Irs3	insulin receptor substrate 3	16369	0.00436745	-1.69851	Downregulated
Adcy9	adenylate cyclase 9	11515	0.00337566	-1.71846	Downregulated
Cd274	CD274 antigen	60533	0.0105227	-1.72468	Downregulated
Ppp1r3b	protein phosphatase 1, regulatory subunit 3B	244416	0.0213593	-1.80231	Downregulated
Vat1l	vesicle amine transport protein 1 like	270097	0.00638557	-1.81584	Downregulated
Adora1	adenosine A1 receptor	11539	0.00301404	-1.81718	Downregulated
Plekhh3	pleckstrin homology domain containing, family H (with MyTH4 domain) member 3	217198	0.0019518	-1.86638	Downregulated
Stat5a	signal transducer and activator of transcription 5A	20850	0.00108616	-1.86931	Downregulated
Wnt5a	wingless-type MMTV integration site family, member 5A	22418	0.000662408	-1.89018	Downregulated
Ikzf2	IKAROS family zinc finger 2	22779	0.00028915	-1.89392	Downregulated
Lrrc15	leucine rich repeat containing 15	74488	0.00182415	-1.89727	Downregulated
Rasl12	RAS-like, family 12	70784	0.00360862	-1.92527	Downregulated
Cebpa	CCAAT/enhancer binding protein (C/EBP), alpha	12606	0.00264128	-2.00986	Downregulated
Kbtbd11	kelch repeat and BTB (POZ) domain containing 11	74901	0.00407856	-2.06026	Downregulated
Per3	period circadian clock 3	18628	0.00448384	-2.06748	Downregulated
Slc40a1	solute carrier family 40 (iron-regulated transporter), member 1	53945	0.000749792	-2.14264	Downregulated
Srebf1	sterol regulatory element binding transcription factor 1	20787	0.00813796	-2.19303	Downregulated
Itih4	inter alpha-trypsin inhibitor, heavy chain 4	16427	0.017353	-2.20945	Downregulated
Pik3r1	phosphoinositide-3-kinase regulatory subunit 1	18708	6.60064e-05	-2.6553	Downregulated
Klhdc7a	kelch domain containing 7A	242721	0.000343602	-3.28412	Downregulated

## Sheet: Old RT vs Young RT
Gene information			Overall p value	Log2-fold-change	DEG
Symbol	Description	Entrez ID	Old RT / Young RT	Old RT / Young RT	Old RT / Young RT
Cyp2b10	cytochrome P450, family 2, subfamily b, polypeptide 10	13088	0.00166148	2.52574	Upregulated
Peg3	paternally expressed 3	18616	0.00132167	2.43105	Upregulated
Mfsd2a	major facilitator superfamily domain containing 2A	76574	0.0012175	2.28736	Upregulated
Gmpr	guanosine monophosphate reductase	66355	0.000160609	2.25052	Upregulated
Gldn	gliomedin	235379	0.000117576	2.23358	Upregulated
Slc25a34	solute carrier family 25, member 34	384071	0.00106468	2.2167	Upregulated
Lgr6	leucine-rich repeat-containing G protein-coupled receptor 6	329252	0.000955886	2.20657	Upregulated
Irs2	insulin receptor substrate 2	384783	8.73171e-05	2.07132	Upregulated
Ripk4	receptor-interacting serine-threonine kinase 4	72388	0.000282011	1.95615	Upregulated
Itih4	inter alpha-trypsin inhibitor, heavy chain 4	16427	0.00628453	1.92265	Upregulated
Ryr2	ryanodine receptor 2, cardiac	20191	5.99263e-05	1.89076	Upregulated
Fkbp5	FK506 binding protein 5	14229	0.00582456	1.83093	Upregulated
Kcnj15	potassium inwardly-rectifying channel, subfamily J, member 15	16516	0.000497759	1.77804	Upregulated
Depp1	DEPP1 autophagy regulator	213393	0.00164058	1.60382	Upregulated
Mmp3	matrix metallopeptidase 3	17392	9.82937e-05	1.60255	Upregulated
Mt2	metallothionein 2	17750	0.00275148	1.58048	Upregulated
Acot1	acyl-CoA thioesterase 1	26897	0.00258468	1.57823	Upregulated
Cdkn1a	cyclin-dependent kinase inhibitor 1A (P21)	12575	0.00706012	1.56585	Upregulated
Gramd1b	GRAM domain containing 1B	235283	0.00482943	1.49813	Upregulated
Cyp4b1	cytochrome P450, family 4, subfamily b, polypeptide 1	13120	0.00115261	1.46616	Upregulated
Hmox1	heme oxygenase 1	15368	0.00937537	1.44402	Upregulated
Hmgcs2	3-hydroxy-3-methylglutaryl-Coenzyme A synthase 2	15360	0.0009871	1.4108	Upregulated
Dok6	docking protein 6	623279	0.00046568	1.39744	Upregulated
Cystm1	cysteine-rich transmembrane module containing 1	66060	0.000475785	1.34555	Upregulated
Hk1	hexokinase 1	15275	0.000346695	1.33068	Upregulated
Btc	betacellulin, epidermal growth factor family member	12223	0.000109733	1.28436	Upregulated
Apold1	apolipoprotein L domain containing 1	381823	0.00134599	1.27207	Upregulated
Prrg4	proline rich Gla (G-carboxyglutamic acid) 4 (transmembrane)	228413	0.000186592	1.24639	Upregulated
Med10	mediator complex subunit 10	28077	1.48676e-05	1.24134	Upregulated
Cers4	ceramide synthase 4	67260	0.000259483	1.20317	Upregulated
Egln3	egl-9 family hypoxia-inducible factor 3	112407	0.00093464	1.19223	Upregulated
Gpnmb	glycoprotein (transmembrane) nmb	93695	0.00692998	1.19013	Upregulated
Sesn2	sestrin 2	230784	0.0012708	1.1829	Upregulated
Slc29a1	solute carrier family 29 (nucleoside transporters), member 1	63959	0.0153962	1.16666	Upregulated
Tead1	TEA domain family member 1	21676	0.0210635	1.15609	Upregulated
Clec10a	C-type lectin domain family 10, member A	17312	0.00630173	1.15515	Upregulated
Ddit4	DNA-damage-inducible transcript 4	74747	0.0134118	1.15138	Upregulated
Angptl4	angiopoietin-like 4	57875	0.00198659	1.15104	Upregulated
Mafb	v-maf musculoaponeurotic fibrosarcoma oncogene family, protein B (avian)	16658	0.00221026	1.14467	Upregulated
Ighm	immunoglobulin heavy constant mu	16019	0.031043	1.14059	Upregulated
Rragd	Ras-related GTP binding D	52187	0.00110235	1.12086	Upregulated
St3gal5	ST3 beta-galactoside alpha-2,3-sialyltransferase 5	20454	0.00368555	1.10585	Upregulated
Thbs1	thrombospondin 1	21825	0.000351954	1.10425	Upregulated
Cacna1a	calcium channel, voltage-dependent, P/Q type, alpha 1A subunit	12286	0.000717236	1.0951	Upregulated
Alas2	aminolevulinic acid synthase 2, erythroid	11656	0.0109664	1.08822	Upregulated
Rbp7	retinol binding protein 7, cellular	63954	0.00111199	1.08337	Upregulated
Ccl6	chemokine (C-C motif) ligand 6	20305	0.000538798	1.07677	Upregulated
Hbb-bs	hemoglobin, beta adult s chain	100503605	0.00621453	1.07514	Upregulated
F2r	coagulation factor II (thrombin) receptor	14062	0.00103507	1.04355	Upregulated
Adrb2	adrenergic receptor, beta 2	11555	0.0117925	1.04301	Upregulated
Gm25395	predicted gene, 25395	115485773	0.0170101	1.04158	Upregulated
Cntfr	ciliary neurotrophic factor receptor	12804	0.00120114	1.03157	Upregulated
Mt1	metallothionein 1	17748	0.0120496	1.02592	Upregulated
Fam117a	family with sequence similarity 117, member A	215512	0.000123412	1.02086	Upregulated
Ccl9	chemokine (C-C motif) ligand 9	20308	0.00120312	1.0156	Upregulated
Cldn1	claudin 1	12737	0.0045338	1.01393	Upregulated
Igfbp3	insulin-like growth factor binding protein 3	16009	0.00398205	1.00638	Upregulated
Gabarapl1	gamma-aminobutyric acid (GABA) A receptor-associated protein-like 1	57436	0.00203223	1.00581	Upregulated
Slc43a2	solute carrier family 43, member 2	215113	0.00317565	0.979915	Upregulated
Ehhadh	enoyl-Coenzyme A, hydratase/3-hydroxyacyl Coenzyme A dehydrogenase	74147	0.0039528	0.961662	Upregulated
Acer2	alkaline ceramidase 2	230379	0.00230557	0.959462	Upregulated
Fbxo21	F-box protein 21	231670	0.000723039	0.953961	Upregulated
Sgpl1	sphingosine phosphate lyase 1	20397	0.00295963	0.952317	Upregulated
Hbb-bt	hemoglobin, beta adult t chain	101488143	0.0212897	0.948562	Upregulated
Fbxo31	F-box protein 31	76454	0.0142362	0.945709	Upregulated
Gm30173	predicted gene, 30173	102631981	0.00230684	0.936733	Upregulated
Acot4	acyl-CoA thioesterase 4	171282	0.00111404	0.935867	Upregulated
Pde4d	phosphodiesterase 4D, cAMP specific	238871	0.00141393	0.927327	Upregulated
Slc27a2	solute carrier family 27 (fatty acid transporter), member 2	26458	0.00503477	0.926373	Upregulated
Ms4a6b	membrane-spanning 4-domains, subfamily A, member 6B	69774	0.00602563	0.915644	Upregulated
Il4ra	interleukin 4 receptor, alpha	16190	0.00270388	0.908213	Upregulated
Lvrn	laeverin	74574	0.00367765	0.90414	Upregulated
Sh3tc1	SH3 domain and tetratricopeptide repeats 1	231147	0.00198824	0.898848	Upregulated
C4b	complement component 4B (Chido blood group)	12268	0.00468073	0.892414	Upregulated
Mpeg1	macrophage expressed gene 1	17476	0.045538	0.887051	Upregulated
Pdk4	pyruvate dehydrogenase kinase, isoenzyme 4	27273	0.00122881	0.875962	Upregulated
St8sia6	ST8 alpha-N-acetyl-neuraminide alpha-2,8-sialyltransferase 6	241230	0.000304494	0.872311	Upregulated
Sh3pxd2b	SH3 and PX domains 2B	268396	0.000476248	0.871918	Upregulated
Dusp10	dual specificity phosphatase 10	63953	0.00633087	0.860269	Upregulated
Hba-a1	hemoglobin alpha, adult chain 1	15122	0.0161629	0.856718	Upregulated
C1qb	complement component 1, q subcomponent, beta polypeptide	12260	0.00687058	0.854822	Upregulated
Ptafr	platelet-activating factor receptor	19204	0.0359576	0.851157	Upregulated
Hdc	histidine decarboxylase	15186	0.00239092	0.843812	Upregulated
Snx21	sorting nexin family member 21	101113	0.00345104	0.842203	Upregulated
Tiam1	T cell lymphoma invasion and metastasis 1	21844	0.000758511	0.840189	Upregulated
Junb	jun B proto-oncogene	16477	0.00225636	0.836053	Upregulated
Gm19221	protein phosphatase 2 (formerly 2A), regulatory subunit B (PR 52), alpha isoform pseudogene	100418453	0.00910813	0.833132	Upregulated
Atl2	atlastin GTPase 2	56298	0.0380045	0.828159	Upregulated
Zfp938	zinc finger protein 938	237411	0.00190774	0.823976	Upregulated
Lilr4b	leukocyte immunoglobulin-like receptor, subfamily B, member 4B	14727	0.0301232	0.822472	Upregulated
Gadd45g	growth arrest and DNA-damage-inducible 45 gamma	23882	0.0107105	0.819822	Upregulated
Ctss	cathepsin S	13040	0.0115161	0.818826	Upregulated
Pcsk5	proprotein convertase subtilisin/kexin type 5	18552	0.0124393	0.815557	Upregulated
Trp53inp1	transformation related protein 53 inducible nuclear protein 1	60599	0.0315104	0.813803	Upregulated
Sdc4	syndecan 4	20971	0.0176996	0.809583	Upregulated
Galnt15	polypeptide N-acetylgalactosaminyltransferase 15	78754	0.0373045	0.803526	Upregulated
Syk	spleen tyrosine kinase	20963	0.00533694	0.801575	Upregulated
Glrx	glutaredoxin	93692	0.0104217	0.791505	Upregulated
Resf1	retroelement silencing factor 1	67246	0.0443197	0.786724	Upregulated
Adgrg2	adhesion G protein-coupled receptor G2	237175	0.0118943	0.781555	Upregulated
Cd44	CD44 antigen	12505	0.02483	0.78093	Upregulated
Neil2	nei like 2 (E. coli)	382913	0.00291085	0.774414	Upregulated
Pik3ip1	phosphoinositide-3-kinase interacting protein 1	216505	0.00642139	0.774226	Upregulated
Myh14	myosin, heavy polypeptide 14	71960	0.000109845	0.773574	Upregulated
Txnip	thioredoxin interacting protein	56338	0.00840546	0.771374	Upregulated
Marchf1	membrane associated ring-CH-type finger 1	72925	0.010559	0.769459	Upregulated
Coro1a	coronin, actin binding protein 1A	12721	0.00679846	0.763302	Upregulated
Atp1a3	ATPase, Na+/K+ transporting, alpha 3 polypeptide	232975	0.0148473	0.763263	Upregulated
Fcgr3	Fc receptor, IgG, low affinity III	14131	0.00161467	0.755389	Upregulated
Chst11	carbohydrate sulfotransferase 11	58250	0.00169873	0.755365	Upregulated
Tmem140	transmembrane protein 140	68487	0.00574734	0.754825	Upregulated
Sav1	salvador family WW domain containing 1	64010	0.0130586	0.750298	Upregulated
Sema4c	sema domain, immunoglobulin domain (Ig), transmembrane domain (TM) and short cytoplasmic domain, (semaphorin) 4C	20353	0.00715863	0.748487	Upregulated
Slc39a14	solute carrier family 39 (zinc transporter), member 14	213053	0.0279685	0.742171	Upregulated
Btg1	BTG anti-proliferation factor 1	12226	0.00732413	0.73948	Upregulated
Hba-a2	hemoglobin alpha, adult chain 2	110257	0.0165113	0.738786	Upregulated
Apod	apolipoprotein D	11815	0.00664788	0.736979	Upregulated
Sncg	synuclein, gamma	20618	0.00278995	0.731042	Upregulated
Tspan5	tetraspanin 5	56224	0.00813867	0.729207	Upregulated
Pim3	proviral integration site 3	223775	0.010111	0.729161	Upregulated
Lyve1	lymphatic vessel endothelial hyaluronan receptor 1	114332	0.00462015	0.725203	Upregulated
Ifi205	interferon activated gene 205	226695	0.00973387	0.719895	Upregulated
Gstt2	glutathione S-transferase, theta 2	14872	0.0147938	0.719661	Upregulated
Rassf4	Ras association (RalGDS/AF-6) domain family member 4	213391	0.00483281	0.719635	Upregulated
Acsm3	acyl-CoA synthetase medium-chain family member 3	20216	0.000521184	0.719147	Upregulated
Laptm5	lysosomal-associated protein transmembrane 5	16792	0.0185792	0.718472	Upregulated
Ctcflos	CCCTC-binding factor (zinc finger protein)-like, opposite strand	74161	0.0173732	0.717939	Upregulated
Vcan	versican	13003	0.00747065	0.715396	Upregulated
Slc3a2	solute carrier family 3 (activators of dibasic and neutral amino acid transport), member 2	17254	0.0119959	0.713873	Upregulated
9530026P05Rik	RIKEN cDNA 9530026P05 gene	330385	0.00385245	0.712674	Upregulated
Cd163	CD163 antigen	93671	0.00947228	0.711398	Upregulated
Iffo2	intermediate filament family orphan 2	212632	0.00170067	0.709835	Upregulated
Tbc1d20	TBC1 domain family, member 20	67231	0.00904952	0.70934	Upregulated
Ubb	ubiquitin B	22187	0.0059151	0.70932	Upregulated
Itga4	integrin alpha 4	16401	0.0365317	0.706542	Upregulated
Atp1a1	ATPase, Na+/K+ transporting, alpha 1 polypeptide	11928	0.0117793	0.700993	Upregulated
Irak2	interleukin-1 receptor-associated kinase 2	108960	0.00514829	0.699769	Upregulated
Syne3	spectrin repeat containing, nuclear envelope family member 3	212073	0.00321792	0.690575	Upregulated
Adam12	a disintegrin and metallopeptidase domain 12 (meltrin alpha)	11489	0.0175045	0.690409	Upregulated
Cenpo	centromere protein O	52504	0.0111725	0.690029	Upregulated
Nckap1l	NCK associated protein 1 like	105855	0.0158051	0.689992	Upregulated
Tent5c	terminal nucleotidyltransferase 5C	74645	0.03575	0.687272	Upregulated
Gnas	GNAS (guanine nucleotide binding protein, alpha stimulating) complex locus	14683	0.0309326	0.684712	Upregulated
Ptp4a3	protein tyrosine phosphatase 4a3	19245	0.00206149	0.68465	Upregulated
Tmem176a	transmembrane protein 176A	66058	0.0210139	0.682811	Upregulated
Fcgr2b	Fc receptor, IgG, low affinity IIb	14130	0.00851691	0.677255	Upregulated
Hsd11b1	hydroxysteroid 11-beta dehydrogenase 1	15483	0.0228041	0.675069	Upregulated
Plekhf1	pleckstrin homology domain containing, family F (with FYVE domain) member 1	72287	0.0479768	0.675057	Upregulated
Tmeff1	transmembrane protein with EGF-like and two follistatin-like domains 1	230157	0.00169659	0.672875	Upregulated
Ctla2a	cytotoxic T lymphocyte-associated protein 2 alpha	13024	0.00291054	0.672578	Upregulated
Nfil3	nuclear factor, interleukin 3, regulated	18030	0.0421467	0.672497	Upregulated
Lyz2	lysozyme 2	17105	0.00882063	0.671433	Upregulated
Cnr1	cannabinoid receptor 1 (brain)	12801	0.026413	0.671394	Upregulated
Acot2	acyl-CoA thioesterase 2	171210	0.00290035	0.669036	Upregulated
Kirrel	kirre like nephrin family adhesion molecule 1	170643	0.000711409	0.668402	Upregulated
Kalrn	kalirin, RhoGEF kinase	545156	0.0124265	0.667754	Upregulated
C1qa	complement component 1, q subcomponent, alpha polypeptide	12259	0.00906748	0.667494	Upregulated
Nap1l5	nucleosome assembly protein 1-like 5	58243	0.00388712	0.662354	Upregulated
Per1	period circadian clock 1	18626	0.0399349	0.660436	Upregulated
Tns2	tensin 2	209039	0.00627276	0.65939	Upregulated
Ehd4	EH-domain containing 4	98878	0.0163296	0.658752	Upregulated
Pnkd	paroxysmal nonkinesiogenic dyskinesia	56695	0.00606152	0.658237	Upregulated
Hip1r	huntingtin interacting protein 1 related	29816	0.0180635	0.656909	Upregulated
Icam1	intercellular adhesion molecule 1	15894	0.00591942	0.651425	Upregulated
Svep1	sushi, von Willebrand factor type A, EGF and pentraxin domain containing 1	64817	0.0326439	0.651208	Upregulated
Fmo2	flavin containing monooxygenase 2	55990	0.0323988	0.648452	Upregulated
Eda	ectodysplasin-A	13607	0.0158793	0.644231	Upregulated
Dapk1	death associated protein kinase 1	69635	0.010319	0.643913	Upregulated
Cebpd	CCAAT/enhancer binding protein (C/EBP), delta	12609	0.04698	0.637444	Upregulated
Ckb	creatine kinase, brain	12709	0.0157105	0.635802	Upregulated
Mtmr14	myotubularin related protein 14	97287	0.0214066	0.63096	Upregulated
Mfge8	milk fat globule-EGF factor 8 protein	17304	0.00157281	0.628372	Upregulated
Gpc1	glypican 1	14733	0.0112042	0.625745	Upregulated
Lamb1	laminin B1	16777	0.00340472	0.624265	Upregulated
Pck1	phosphoenolpyruvate carboxykinase 1, cytosolic	18534	0.00222872	0.624002	Upregulated
E2f3	E2F transcription factor 3	13557	0.0117041	0.623981	Upregulated
Lrrc15	leucine rich repeat containing 15	74488	0.00993745	0.621106	Upregulated
Pnrc1	proline-rich nuclear receptor coactivator 1	108767	0.00423811	0.621005	Upregulated
Ano1	anoctamin 1, calcium activated chloride channel	101772	0.012683	0.619561	Upregulated
Map7	microtubule-associated protein 7	17761	0.0276594	0.61807	Upregulated
Mapt	microtubule-associated protein tau	17762	0.00925986	0.617883	Upregulated
Fgfr3	fibroblast growth factor receptor 3	14184	0.0278572	0.617729	Upregulated
Plin4	perilipin 4	57435	0.000568625	0.6138	Upregulated
Mroh1	maestro heat-like repeat family member 1	223658	0.0124972	0.610524	Upregulated
Gas7	growth arrest specific 7	14457	0.0200178	0.610515	Upregulated
Fabp3	fatty acid binding protein 3, muscle and heart	14077	0.00879135	0.610152	Upregulated
Mfsd10	major facilitator superfamily domain containing 10	68294	0.00766782	0.610085	Upregulated
Pkp2	plakophilin 2	67451	0.0159559	0.60802	Upregulated
Cldn5	claudin 5	12741	0.00981343	0.606508	Upregulated
Zfp740	zinc finger protein 740	68744	0.0184162	0.606504	Upregulated
Slc4a4	solute carrier family 4 (anion exchanger), member 4	54403	0.0424056	0.606353	Upregulated
Lrp1	low density lipoprotein receptor-related protein 1	16971	0.0276309	0.606316	Upregulated
Scd1	stearoyl-Coenzyme A desaturase 1	20249	0.033998	0.604435	Upregulated
Prkx	protein kinase, X-linked	19108	0.0134527	0.604411	Upregulated
Trit1	tRNA isopentenyltransferase 1	66966	0.00947417	0.60321	Upregulated
Grn	granulin	14824	0.00993322	0.602707	Upregulated
Fst	follistatin	14313	0.0339343	0.602489	Upregulated
A330023F24Rik	RIKEN cDNA A330023F24 gene	320977	0.0201684	0.60141	Upregulated
Ptprk	protein tyrosine phosphatase, receptor type, K	19272	0.0391873	0.599073	Upregulated
Tbc1d9	TBC1 domain family, member 9	71310	0.00772172	0.59837	Upregulated
Tsku	tsukushi, small leucine rich proteoglycan	244152	0.0354973	0.598288	Upregulated
Ucp2	uncoupling protein 2 (mitochondrial, proton carrier)	22228	0.00879879	0.597575	Upregulated
Lrp5	low density lipoprotein receptor-related protein 5	16973	0.00633105	0.597049	Upregulated
Mark1	MAP/microtubule affinity regulating kinase 1	226778	0.00864759	0.594977	Upregulated
Capg	capping protein (actin filament), gelsolin-like	12332	0.0293526	0.591801	Upregulated
Sash1	SAM and SH3 domain containing 1	70097	0.0120098	0.589919	Upregulated
Litaf	LPS-induced TN factor	56722	0.0209728	0.588479	Upregulated
Abca6	ATP-binding cassette, sub-family A (ABC1), member 6	76184	0.00137445	0.58816	Upregulated
Fcer1g	Fc receptor, IgE, high affinity I, gamma polypeptide	14127	0.0163796	0.587976	Upregulated
Abca5	ATP-binding cassette, sub-family A (ABC1), member 5	217265	0.00205089	0.587192	Upregulated
Lamb3	laminin, beta 3	16780	0.0280825	0.585843	Upregulated
Jun	jun proto-oncogene	16476	0.0255916	0.585053	Upregulated
Igsf6	immunoglobulin superfamily, member 6	80719	0.00427796	0.584361	Upregulated
Msr1	macrophage scavenger receptor 1	20288	0.0324976	0.582397	Upregulated
Zc3h10	zinc finger CCCH type containing 10	103284	0.00803594	0.581072	Upregulated
Inpp5d	inositol polyphosphate-5-phosphatase D	16331	0.0195665	0.579617	Upregulated
Dusp18	dual specificity phosphatase 18	75219	0.00525107	0.57898	Upregulated
Slc35e4	solute carrier family 35, member E4	103710	0.0361367	0.57737	Upregulated
Adra1a	adrenergic receptor, alpha 1a	11549	0.00958966	0.57521	Upregulated
Csf1r	colony stimulating factor 1 receptor	12978	0.0215905	0.575151	Upregulated
Ccng2	cyclin G2	12452	0.0133382	0.575073	Upregulated
Etv3	ets variant 3	27049	0.00291247	0.573743	Upregulated
Tmod2	tropomodulin 2	50876	0.0112238	0.57348	Upregulated
Stab1	stabilin 1	192187	0.0350384	0.570519	Upregulated
Rgcc	regulator of cell cycle	66214	0.0405467	0.569665	Upregulated
Tlr7	toll-like receptor 7	170743	0.00347242	0.56946	Upregulated
Klb	klotho beta	83379	0.00604306	0.568588	Upregulated
Galc	galactosylceramidase	14420	0.0043829	0.568445	Upregulated
Nceh1	neutral cholesterol ester hydrolase 1	320024	0.0264495	0.568182	Upregulated
Ifi204	interferon activated gene 204	15951	0.00837016	0.566716	Upregulated
Cpne8	copine VIII	66871	0.00469545	0.566452	Upregulated
Dtx4	deltex 4, E3 ubiquitin ligase	207521	0.00444682	0.563986	Upregulated
Unc13b	unc-13 homolog B	22249	0.0264855	0.561879	Upregulated
Plcl2	phospholipase C-like 2	224860	0.0130079	0.561771	Upregulated
Mfap3l	microfibrillar-associated protein 3-like	71306	0.0135345	0.560692	Upregulated
Wdr73	WD repeat domain 73	71968	0.0299827	0.558603	Upregulated
Pirb	paired Ig-like receptor B	18733	0.033571	0.555496	Upregulated
Tbcel	tubulin folding cofactor E-like	272589	0.0053489	0.5552	Upregulated
Chpf2	chondroitin polymerizing factor 2	100910	0.00236808	0.554709	Upregulated
Osmr	oncostatin M receptor	18414	0.0361466	0.553201	Upregulated
Actn1	actinin, alpha 1	109711	0.00148178	0.552712	Upregulated
Slc2a1	solute carrier family 2 (facilitated glucose transporter), member 1	20525	0.00301997	0.55186	Upregulated
Slc2a3	solute carrier family 2 (facilitated glucose transporter), member 3	20527	0.0354331	0.551563	Upregulated
Tmem106a	transmembrane protein 106A	217203	0.00601171	0.550307	Upregulated
Fuca2	fucosidase, alpha-L- 2, plasma	66848	0.00644784	0.54992	Upregulated
Cpeb4	cytoplasmic polyadenylation element binding protein 4	67579	0.00655349	0.549762	Upregulated
Cdc25a	cell division cycle 25A	12530	0.0103801	0.546476	Upregulated
Pde3a	phosphodiesterase 3A, cGMP inhibited	54611	0.0143346	0.546057	Upregulated
Vwf	Von Willebrand factor	22371	0.00508115	0.545868	Upregulated
Epha2	Eph receptor A2	13836	0.0168352	0.542121	Upregulated
Snhg12	small nucleolar RNA host gene 12	100039864	0.0161262	0.541997	Upregulated
Abtb2	ankyrin repeat and BTB (POZ) domain containing 2	99382	0.019528	0.538827	Upregulated
Man1c1	mannosidase, alpha, class 1C, member 1	230815	0.00474454	0.536628	Upregulated
Fam117b	family with sequence similarity 117, member B	72750	0.0206627	0.536396	Upregulated
Dmrt2	doublesex and mab-3 related transcription factor 2	226049	0.0133163	0.535615	Upregulated
Osbpl11	oxysterol binding protein-like 11	106326	0.0272879	0.531856	Upregulated
Trim24	tripartite motif-containing 24	21848	0.038103	0.531727	Upregulated
Brpf3	bromodomain and PHD finger containing, 3	268936	0.0271557	0.530609	Upregulated
Diaph1	diaphanous related formin 1	13367	0.00151594	0.530502	Upregulated
Nectin2	nectin cell adhesion molecule 2	19294	0.00527856	0.529635	Upregulated
Ing2	inhibitor of growth family, member 2	69260	0.0021449	0.529205	Upregulated
Pfkp	phosphofructokinase, platelet	56421	0.00195507	0.528931	Upregulated
Aldh16a1	aldehyde dehydrogenase 16 family, member A1	69748	0.00467128	0.528921	Upregulated
Gab2	growth factor receptor bound protein 2-associated protein 2	14389	0.00447938	0.527843	Upregulated
Dcun1d3	DCN1, defective in cullin neddylation 1, domain containing 3 (S. cerevisiae)	233805	0.0190071	0.526555	Upregulated
Ndrg1	N-myc downstream regulated gene 1	17988	0.0131927	0.526476	Upregulated
Ophn1	oligophrenin 1	94190	0.0116831	0.526381	Upregulated
Cyp1b1	cytochrome P450, family 1, subfamily b, polypeptide 1	13078	0.0227712	0.52559	Upregulated
Slc6a19	solute carrier family 6 (neurotransmitter transporter), member 19	74338	0.0183056	0.525259	Upregulated
Armcx5	armadillo repeat containing, X-linked 5	494468	0.00122825	0.523643	Upregulated
Tob2	transducer of ERBB2, 2	57259	0.0249585	0.521659	Upregulated
Akap13	A kinase (PRKA) anchor protein 13	75547	0.00561107	0.521392	Upregulated
F13a1	coagulation factor XIII, A1 subunit	74145	0.0259056	0.520675	Upregulated
Ifi207	interferon activated gene 207	226691	0.0108103	0.518583	Upregulated
Frrs1	ferric-chelate reductase 1	20321	0.0422175	0.518351	Upregulated
Enc1	ectodermal-neural cortex 1	13803	0.00540121	0.517895	Upregulated
Mettl27	methyltransferase like 27	79565	0.00453911	0.517068	Upregulated
2410006H16Rik	RIKEN cDNA 2410006H16 gene	69221	0.00173321	0.516986	Upregulated
Msantd3	Myb/SANT-like DNA-binding domain containing 3	66665	0.0115986	0.516425	Upregulated
Il13ra1	interleukin 13 receptor, alpha 1	16164	0.0329348	0.51578	Upregulated
Sla	src-like adaptor	20491	0.00594773	0.515775	Upregulated
Akr1b8	aldo-keto reductase family 1, member B8	14187	0.0108616	0.515568	Upregulated
Zpr1	ZPR1 zinc finger	22687	0.0282894	0.511775	Upregulated
Mapre3	microtubule-associated protein, RP/EB family, member 3	100732	0.0109978	0.511632	Upregulated
Plek	pleckstrin	56193	0.0428144	0.511352	Upregulated
Slc38a7	solute carrier family 38, member 7	234595	0.0157433	0.511041	Upregulated
Slc5a3	solute carrier family 5 (inositol transporters), member 3	53881	0.0478218	0.510368	Upregulated
Wdtc1	WD and tetratricopeptide repeats 1	230796	0.0221982	0.509496	Upregulated
Fermt1	fermitin family member 1	241639	0.0104437	0.509183	Upregulated
Trmt1	tRNA methyltransferase 1	212528	0.00880674	0.507766	Upregulated
Plin5	perilipin 5	66968	0.0148625	0.507225	Upregulated
Slc41a2	solute carrier family 41, member 2	338365	0.0121811	0.506958	Upregulated
Ffar4	free fatty acid receptor 4	107221	0.02817	0.50574	Upregulated
Gpat4	glycerol-3-phosphate acyltransferase 4	102247	0.0412135	0.505533	Upregulated
Slc16a4	solute carrier family 16 (monocarboxylic acid transporters), member 4	229699	0.0192378	0.505401	Upregulated
Vcam1	vascular cell adhesion molecule 1	22329	0.0162875	0.504102	Upregulated
Anxa1	annexin A1	16952	0.00823888	0.503721	Upregulated
Cab39	calcium binding protein 39	12283	0.0266668	0.503011	Upregulated
Eppk1	epiplakin 1	223650	0.0124502	0.502976	Upregulated
Tmem176b	transmembrane protein 176B	65963	0.0129673	0.502916	Upregulated
Ddhd1	DDHD domain containing 1	114874	0.00322907	0.50271	Upregulated
C3ar1	complement component 3a receptor 1	12267	0.0425454	0.502447	Upregulated
Npc1	NPC intracellular cholesterol transporter 1	18145	0.0374531	0.502433	Upregulated
Cd53	CD53 antigen	12508	0.0248056	0.502031	Upregulated
Sptbn5	spectrin beta, non-erythrocytic 5	640524	0.00588476	0.500383	Upregulated
Smad6	SMAD family member 6	17130	0.0385721	0.50034	Upregulated
Pla2r1	phospholipase A2 receptor 1	18779	0.00761208	0.498887	Upregulated
Thsd7a	thrombospondin, type I, domain containing 7A	330267	0.0178233	0.493784	Upregulated
Igfbp4	insulin-like growth factor binding protein 4	16010	0.0269851	0.493425	Upregulated
Med12	mediator complex subunit 12	59024	0.0134216	0.492784	Upregulated
Zfp36	zinc finger protein 36	22695	0.046768	0.491463	Upregulated
Trp53bp2	transformation related protein 53 binding protein 2	209456	0.0320674	0.489008	Upregulated
Eaf2	ELL associated factor 2	106389	0.0342788	0.488731	Upregulated
9330159F19Rik	RIKEN cDNA 9330159F19 gene	212448	0.0248004	0.488252	Upregulated
Hspb8	heat shock protein 8	80888	0.0248457	0.48768	Upregulated
Emp1	epithelial membrane protein 1	13730	0.00833071	0.486396	Upregulated
Tmem131l	transmembrane 131 like	229473	0.0208092	0.484929	Upregulated
Notch4	notch 4	18132	0.029169	0.484205	Upregulated
Ust	uronyl-2-sulfotransferase	338362	0.0283731	0.482512	Upregulated
Kcna2	potassium voltage-gated channel, shaker-related subfamily, member 2	16490	0.00147669	0.480836	Upregulated
Maml3	mastermind like transcriptional coactivator 3	433586	0.0149882	0.477231	Upregulated
Arhgap42	Rho GTPase activating protein 42	71544	0.0394412	0.474491	Upregulated
Got1	glutamic-oxaloacetic transaminase 1, soluble	14718	0.0239537	0.474199	Upregulated
Ubc	ubiquitin C	22190	0.0291278	0.47382	Upregulated
Tbc1d15	TBC1 domain family, member 15	66687	0.0292047	0.473341	Upregulated
1110051M20Rik	RIKEN cDNA 1110051M20 gene	228356	0.00532844	0.472685	Upregulated
Eif3f	eukaryotic translation initiation factor 3, subunit F	66085	0.0301163	0.472014	Upregulated
Lncpint	long non-protein coding RNA, Trp53 induced transcript	232685	0.0455633	0.472009	Upregulated
Mvp	major vault protein	78388	0.00456729	0.471999	Upregulated
Atp1b1	ATPase, Na+/K+ transporting, beta 1 polypeptide	11931	0.0160604	0.469301	Upregulated
N4bp2	NEDD4 binding protein 2	333789	0.0297704	0.468101	Upregulated
Cnnm2	cyclin M2	94219	0.0348827	0.467346	Upregulated
Katnal2	katanin p60 subunit A-like 2	71206	0.0472248	0.466337	Upregulated
Tlr4	toll-like receptor 4	21898	0.00692773	0.466011	Upregulated
Ifitm2	interferon induced transmembrane protein 2	80876	0.0332109	0.465579	Upregulated
Abi2	abl-interactor 2	329165	0.0484497	0.465039	Upregulated
Itga3	integrin alpha 3	16400	0.0137859	0.464783	Upregulated
Zc3h4	zinc finger CCCH-type containing 4	330474	0.025297	0.463953	Upregulated
Sugt1	SGT1, suppressor of G2 allele of SKP1 (S. cerevisiae)	67955	0.0224242	0.46298	Upregulated
Kdm3a	lysine (K)-specific demethylase 3A	104263	0.00266822	0.459988	Upregulated
Bag6	BCL2-associated athanogene 6	224727	0.020181	0.459984	Upregulated
Tlr8	toll-like receptor 8	170744	0.0388558	0.455466	Upregulated
Lrrc59	leucine rich repeat containing 59	98238	0.0072398	0.45398	Upregulated
Fnbp1	formin binding protein 1	14269	0.00718706	0.452826	Upregulated
Stambp	STAM binding protein	70527	0.0464101	0.452259	Upregulated
Myl12a	myosin, light chain 12A, regulatory, non-sarcomeric	67268	0.0183096	0.450598	Upregulated
Midn	midnolin	59090	0.0217561	0.449966	Upregulated
Kcnk3	potassium channel, subfamily K, member 3	16527	0.0061307	0.449722	Upregulated
Lta4h	leukotriene A4 hydrolase	16993	0.0166757	0.44918	Upregulated
Sqstm1	sequestosome 1	18412	0.00781549	0.448714	Upregulated
Lpin2	lipin 2	64898	0.024365	0.448307	Upregulated
Ivns1abp	influenza virus NS1A binding protein	117198	0.0254182	0.447864	Upregulated
Ap1g2	adaptor protein complex AP-1, gamma 2 subunit	11766	0.00374611	0.447405	Upregulated
Trim2	tripartite motif-containing 2	80890	0.016179	0.447344	Upregulated
Ptprj	protein tyrosine phosphatase, receptor type, J	19271	0.0323065	0.446546	Upregulated
Clmn	calmin	94040	0.0238102	0.445697	Upregulated
Snrk	SNF related kinase	20623	0.00733551	0.445505	Upregulated
Plekhm2	pleckstrin homology domain containing, family M (with RUN domain) member 2	69582	0.00976241	0.444015	Upregulated
Polr2a	polymerase (RNA) II (DNA directed) polypeptide A	20020	0.0381683	0.443503	Upregulated
Syvn1	synovial apoptosis inhibitor 1, synoviolin	74126	0.0112108	0.443135	Upregulated
Ube2o	ubiquitin-conjugating enzyme E2O	217342	0.00547217	0.442793	Upregulated
B3galnt1	UDP-GalNAc:betaGlcNAc beta 1,3-galactosaminyltransferase, polypeptide 1	26879	0.0380546	0.442721	Upregulated
Lcmt2	leucine carboxyl methyltransferase 2	329504	0.0212155	0.442478	Upregulated
Coro2b	coronin, actin binding protein, 2B	235431	0.0448217	0.44235	Upregulated
Coq8a	coenzyme Q8A	67426	0.0116246	0.441663	Upregulated
Sorbs3	sorbin and SH3 domain containing 3	20410	0.0310908	0.440635	Upregulated
Plbd2	phospholipase B domain containing 2	71772	0.0373551	0.44063	Upregulated
Plekhm3	pleckstrin homology domain containing, family M, member 3	241075	0.0160391	0.440596	Upregulated
Zkscan17	zinc finger with KRAB and SCAN domains 17	268417	0.0094515	0.440437	Upregulated
Capn15	calpain 15	50817	0.0149004	0.439098	Upregulated
Ctcfl	CCCTC-binding factor (zinc finger protein)-like	664799	0.034439	0.438804	Upregulated
Vars	valyl-tRNA synthetase	22321	0.0299344	0.435959	Upregulated
Kdm2b	lysine (K)-specific demethylase 2B	30841	0.0209865	0.435624	Upregulated
Eci3	enoyl-Coenzyme A delta isomerase 3	69123	0.0413561	0.435449	Upregulated
Bend3	BEN domain containing 3	331623	0.0326308	0.434726	Upregulated
Atp2a3	ATPase, Ca++ transporting, ubiquitous	53313	0.020265	0.433283	Upregulated
2700097O09Rik	RIKEN cDNA 2700097O09 gene	72658	0.0497933	0.433134	Upregulated
Ube2l6	ubiquitin-conjugating enzyme E2L 6	56791	0.0343946	0.432671	Upregulated
Ehd3	EH-domain containing 3	57440	0.0352253	0.432484	Upregulated
Amigo2	adhesion molecule with Ig like domain 2	105827	0.0305043	0.431754	Upregulated
Kctd15	potassium channel tetramerisation domain containing 15	233107	0.022995	0.431633	Upregulated
Itpk1	inositol 1,3,4-triphosphate 5/6 kinase	217837	0.0129597	0.43097	Upregulated
Arid5a	AT rich interactive domain 5A (MRF1-like)	214855	0.0439212	0.430782	Upregulated
Pi4k2b	phosphatidylinositol 4-kinase type 2 beta	67073	0.0406291	0.430638	Upregulated
C1qc	complement component 1, q subcomponent, C chain	12262	0.0169686	0.428502	Upregulated
Rad54l2	RAD54 like 2 (S. cerevisiae)	81000	0.048797	0.42791	Upregulated
Chd1	chromodomain helicase DNA binding protein 1	12648	0.0492105	0.427365	Upregulated
Mrc1	mannose receptor, C type 1	17533	0.0466266	0.426243	Upregulated
Wipi2	WD repeat domain, phosphoinositide interacting 2	74781	0.0151274	0.426001	Upregulated
Hic2	hypermethylated in cancer 2	58180	0.00914346	0.425026	Upregulated
Kctd12	potassium channel tetramerisation domain containing 12	239217	0.00547499	0.421904	Upregulated
Tmub1	transmembrane and ubiquitin-like domain containing 1	64295	0.031074	0.421508	Upregulated
Pacsin3	protein kinase C and casein kinase substrate in neurons 3	80708	0.0058051	0.421472	Upregulated
Ncoa5	nuclear receptor coactivator 5	228869	0.0239216	0.418921	Upregulated
Colca2	COLCA2 homolog	100502940	0.0408459	0.41867	Upregulated
Prkcd	protein kinase C, delta	18753	0.0335872	0.418572	Upregulated
Trim28	tripartite motif-containing 28	21849	0.0157788	0.418337	Upregulated
Slc20a2	solute carrier family 20, member 2	20516	0.0225036	0.417407	Upregulated
Rabgef1	RAB guanine nucleotide exchange factor (GEF) 1	56715	0.029011	0.417347	Upregulated
Chrna2	cholinergic receptor, nicotinic, alpha polypeptide 2 (neuronal)	110902	0.0263488	0.416153	Upregulated
Prelp	proline arginine-rich end leucine-rich repeat	116847	0.0304537	0.41363	Upregulated
Hnrnpl	heterogeneous nuclear ribonucleoprotein L	15388	0.028225	0.413166	Upregulated
Cirbp	cold inducible RNA binding protein	12696	0.0203791	0.412057	Upregulated
Nop53	NOP53 ribosome biogenesis factor	68077	0.0259049	0.411509	Upregulated
Six4	sine oculis-related homeobox 4	20474	0.0375208	0.410553	Upregulated
Csrnp1	cysteine-serine-rich nuclear protein 1	215418	0.0175114	0.41029	Upregulated
Morf4l1	mortality factor 4 like 1	21761	0.018599	0.409755	Upregulated
Gcnt2	glucosaminyl (N-acetyl) transferase 2, I-branching enzyme	14538	0.0263685	0.409193	Upregulated
Cbr2	carbonyl reductase 2	12409	0.023168	0.408747	Upregulated
Arl8a	ADP-ribosylation factor-like 8A	68724	0.00443707	0.408639	Upregulated
Decr2	2-4-dienoyl-Coenzyme A reductase 2, peroxisomal	26378	0.0261069	0.408376	Upregulated
Stat3	signal transducer and activator of transcription 3	20848	0.0424548	0.407698	Upregulated
Ahi1	Abelson helper integration site 1	52906	0.00597026	0.407519	Upregulated
Parvb	parvin, beta	170736	0.0278642	0.406442	Upregulated
Cnppd1	cyclin Pas1/PHO80 domain containing 1	69171	0.0453755	0.40558	Upregulated
Agtrap	angiotensin II, type I receptor-associated protein	11610	0.00355469	0.405028	Upregulated
Hsp90ab1	heat shock protein 90 alpha (cytosolic), class B member 1	15516	0.00293711	0.404633	Upregulated
Jrk	jerky	16469	0.0150915	0.404633	Upregulated
Crebrf	CREB3 regulatory factor	77128	0.0246965	0.404214	Upregulated
Ctnnbl1	catenin, beta like 1	66642	0.0118577	0.403781	Upregulated
Pamr1	peptidase domain containing associated with muscle regeneration 1	210622	0.0316735	0.403691	Upregulated
Atg101	autophagy related 101	68118	0.0336478	0.401778	Upregulated
Tsc22d4	TSC22 domain family, member 4	78829	0.00936375	0.401041	Upregulated
Cd84	CD84 antigen	12523	0.0327512	0.398125	Upregulated
Macroh2a2	macroH2A.2 histone	404634	0.0337386	0.397715	Upregulated
Pla2g7	phospholipase A2, group VII (platelet-activating factor acetylhydrolase, plasma)	27226	0.0334827	0.396214	Upregulated
Myo5b	myosin VB	17919	0.0207271	0.394839	Upregulated
Xab2	XPA binding protein 2	67439	0.00992677	0.391822	Upregulated
Ntn4	netrin 4	57764	0.011555	0.390444	Upregulated
Arhgef3	Rho guanine nucleotide exchange factor (GEF) 3	71704	0.0210281	0.390144	Upregulated
Slc8b1	solute carrier family 8 (sodium/lithium/calcium exchanger), member B1	170756	0.0242922	0.388629	Upregulated
Stk19	serine/threonine kinase 19	54402	0.0439148	0.386667	Upregulated
Eln	elastin	13717	0.0385271	0.386065	Upregulated
Jade2	jade family PHD finger 2	76901	0.0398959	0.384996	Upregulated
Fem1c	fem 1 homolog c	240263	0.0234568	0.382695	Upregulated
Nox4	NADPH oxidase 4	50490	0.0283596	0.382485	Upregulated
Tecpr1	tectonin beta-propeller repeat containing 1	70381	0.0104687	0.3821	Upregulated
Ung	uracil DNA glycosylase	22256	0.0390495	0.381909	Upregulated
Grk3	G protein-coupled receptor kinase 3	320129	0.0143337	-0.38152	Downregulated
Vps13c	vacuolar protein sorting 13C	320528	0.0326441	-0.381598	Downregulated
Abca8a	ATP-binding cassette, sub-family A (ABC1), member 8a	217258	0.031172	-0.382327	Downregulated
Scyl1	SCY1-like 1 (S. cerevisiae)	78891	0.0356509	-0.384439	Downregulated
Mrm2	mitochondrial rRNA methyltransferase 2	68017	0.00710893	-0.38729	Downregulated
Reck	reversion-inducing-cysteine-rich protein with kazal motifs	53614	0.0299665	-0.387717	Downregulated
Swi5	SWI5 recombination repair homolog (yeast)	72931	0.00512365	-0.388049	Downregulated
Slc28a2	solute carrier family 28 (sodium-coupled nucleoside transporter), member 2	269346	0.0466578	-0.388407	Downregulated
C1galt1	core 1 synthase, glycoprotein-N-acetylgalactosamine 3-beta-galactosyltransferase, 1	94192	0.00950508	-0.388526	Downregulated
Emc9	ER membrane protein complex subunit 9	85308	0.0271099	-0.388875	Downregulated
Ap4s1	adaptor-related protein complex AP-4, sigma 1	11782	0.0340211	-0.389697	Downregulated
Vti1b	vesicle transport through interaction with t-SNAREs 1B	53612	0.0204028	-0.390388	Downregulated
Marveld1	MARVEL (membrane-associating) domain containing 1	277010	0.0158594	-0.390621	Downregulated
Cc2d2a	coiled-coil and C2 domain containing 2A	231214	0.0257583	-0.393846	Downregulated
Gypc	glycophorin C	71683	0.0343421	-0.395308	Downregulated
Rfxap	regulatory factor X-associated protein	170767	0.0155335	-0.395399	Downregulated
Fam161a	family with sequence similarity 161, member A	73873	0.0416647	-0.395498	Downregulated
Mettl7a1	methyltransferase like 7A1	70152	0.0267317	-0.396598	Downregulated
Arap3	ArfGAP with RhoGAP domain, ankyrin repeat and PH domain 3	106952	0.0440588	-0.397173	Downregulated
Trpm3	transient receptor potential cation channel, subfamily M, member 3	226025	0.0192428	-0.398946	Downregulated
Gstk1	glutathione S-transferase kappa 1	76263	0.00746595	-0.399093	Downregulated
Uhrf1bp1	UHRF1 (ICBP90) binding protein 1	224648	0.00454236	-0.399413	Downregulated
Ccdc66	coiled-coil domain containing 66	320234	0.0208907	-0.399478	Downregulated
Lipt1	lipoyltransferase 1	623661	0.0367846	-0.40004	Downregulated
Dusp7	dual specificity phosphatase 7	235584	0.0270991	-0.400621	Downregulated
6430550D23Rik	RIKEN cDNA 6430550D23 gene	320095	0.0256313	-0.40084	Downregulated
Calcrl	calcitonin receptor-like	54598	0.036244	-0.401161	Downregulated
Tomm20	translocase of outer mitochondrial membrane 20	67952	0.0252868	-0.402039	Downregulated
Sfxn5	sideroflexin 5	94282	0.00671228	-0.402955	Downregulated
Egfl7	EGF-like domain 7	353156	0.0363042	-0.40305	Downregulated
Slc2a12	solute carrier family 2 (facilitated glucose transporter), member 12	353169	0.013021	-0.403128	Downregulated
Nme6	NME/NM23 nucleoside diphosphate kinase 6	54369	0.00509958	-0.404379	Downregulated
Higd1a	HIG1 domain family, member 1A	56295	0.00381897	-0.404565	Downregulated
Mpc2	mitochondrial pyruvate carrier 2	70456	0.0179681	-0.404805	Downregulated
Sgk3	serum/glucocorticoid regulated kinase 3	170755	0.00642669	-0.40576	Downregulated
Tenm4	teneurin transmembrane protein 4	23966	0.0356309	-0.406907	Downregulated
Rnf7	ring finger protein 7	19823	0.0020316	-0.408022	Downregulated
Acsl3	acyl-CoA synthetase long-chain family member 3	74205	0.0427585	-0.408415	Downregulated
Ivd	isovaleryl coenzyme A dehydrogenase	56357	0.0140247	-0.408775	Downregulated
1700096K18Rik	RIKEN cDNA 1700096K18 gene	73571	0.00212548	-0.408912	Downregulated
Polr2i	polymerase (RNA) II (DNA directed) polypeptide I	69920	0.00480417	-0.409157	Downregulated
Ppp1r9a	protein phosphatase 1, regulatory subunit 9A	243725	0.0249564	-0.410043	Downregulated
Kctd6	potassium channel tetramerisation domain containing 6	71393	0.0367473	-0.410263	Downregulated
Ttc21b	tetratricopeptide repeat domain 21B	73668	0.0222485	-0.410571	Downregulated
Dglucy	D-glutamate cyclase	217830	0.0476811	-0.410693	Downregulated
Als2cl	ALS2 C-terminal like	235633	0.0179507	-0.410735	Downregulated
Mrap	melanocortin 2 receptor accessory protein	77037	0.0154146	-0.410877	Downregulated
Gt(ROSA)26Sor	gene trap ROSA 26, Philippe Soriano	14910	0.0257858	-0.411431	Downregulated
Natd1	N-acetyltransferase domain containing 1	24083	0.0219589	-0.413188	Downregulated
Prdm10	PR domain containing 10	382066	0.0450164	-0.413567	Downregulated
Ccdc9b	coiled-coil domain containing 9B	214239	0.0127567	-0.413679	Downregulated
Dnajc28	DnaJ heat shock protein family (Hsp40) member C28	246738	0.0198553	-0.414092	Downregulated
Pet100	PET100 homolog	100503890	0.0147369	-0.414095	Downregulated
Pkd2l2	polycystic kidney disease 2-like 2	53871	0.0419196	-0.414937	Downregulated
Osbpl6	oxysterol binding protein-like 6	99031	0.0212936	-0.415756	Downregulated
Itga1	integrin alpha 1	109700	0.0189159	-0.416472	Downregulated
Nphp1	nephronophthisis 1 (juvenile) homolog (human)	53885	0.0221368	-0.416782	Downregulated
Gprc5c	G protein-coupled receptor, family C, group 5, member C	70355	0.0101966	-0.417038	Downregulated
Cntnap1	contactin associated protein-like 1	53321	0.0365596	-0.417183	Downregulated
Cd1d1	CD1d1 antigen	12479	0.016152	-0.418453	Downregulated
Spon1	spondin 1, (f-spondin) extracellular matrix protein	233744	0.017836	-0.41881	Downregulated
Gpr153	G protein-coupled receptor 153	100129	0.0253439	-0.419063	Downregulated
Eepd1	endonuclease/exonuclease/phosphatase family domain containing 1	67484	0.0124307	-0.419212	Downregulated
Plpp6	phospholipid phosphatase 6	74411	0.0145212	-0.419269	Downregulated
Klhl5	kelch-like 5	71778	0.0314384	-0.419979	Downregulated
Syt12	synaptotagmin XII	171180	0.0119097	-0.420439	Downregulated
4921531C22Rik	RIKEN cDNA 4921531C22 gene	66730	0.0176796	-0.420587	Downregulated
Snx11	sorting nexin 11	74479	0.0206862	-0.420993	Downregulated
Ifi35	interferon-induced protein 35	70110	0.0105879	-0.42105	Downregulated
Ttl	tubulin tyrosine ligase	69737	0.0174874	-0.421631	Downregulated
Ppp2r5a	protein phosphatase 2, regulatory subunit B', alpha	226849	0.0181862	-0.422502	Downregulated
Per3	period circadian clock 3	18628	0.0494419	-0.423859	Downregulated
Egflam	EGF-like, fibronectin type III and laminin G domains	268780	0.0375937	-0.424081	Downregulated
Sorbs1	sorbin and SH3 domain containing 1	20411	0.0211894	-0.426266	Downregulated
Kctd12b	potassium channel tetramerisation domain containing 12b	207474	0.0395747	-0.426891	Downregulated
Tlcd1	TLC domain containing 1	68385	0.0223045	-0.427018	Downregulated
Traf4	TNF receptor associated factor 4	22032	0.0309529	-0.428328	Downregulated
Gfod1	glucose-fructose oxidoreductase domain containing 1	328232	0.0153136	-0.429526	Downregulated
Calm2	calmodulin 2	12314	0.00735641	-0.429621	Downregulated
Jam2	junction adhesion molecule 2	67374	0.0322651	-0.4297	Downregulated
Ajuba	ajuba LIM protein	16475	0.0459743	-0.429784	Downregulated
Rcc1	regulator of chromosome condensation 1	100088	0.0194712	-0.432103	Downregulated
Sox18	SRY (sex determining region Y)-box 18	20672	0.0130775	-0.432127	Downregulated
Rhobtb2	Rho-related BTB domain containing 2	246710	0.0256133	-0.432177	Downregulated
Tmem161a	transmembrane protein 161A	234371	0.0290154	-0.432248	Downregulated
Ptprd	protein tyrosine phosphatase, receptor type, D	19266	0.00732329	-0.432859	Downregulated
Cdh23	cadherin 23 (otocadherin)	22295	0.0407816	-0.434069	Downregulated
Il11ra1	interleukin 11 receptor, alpha chain 1	16157	0.0225059	-0.43432	Downregulated
Aco1	aconitase 1	11428	0.00982629	-0.43587	Downregulated
Pdhb	pyruvate dehydrogenase (lipoamide) beta	68263	0.0164061	-0.436283	Downregulated
Hemk1	HemK methyltransferase family member 1	69536	0.0223648	-0.436845	Downregulated
Gnptab	N-acetylglucosamine-1-phosphate transferase, alpha and beta subunits	432486	0.011989	-0.437739	Downregulated
Mrpl18	mitochondrial ribosomal protein L18	67681	0.00262507	-0.43789	Downregulated
Vav2	vav 2 oncogene	22325	0.0441772	-0.437949	Downregulated
Spry2	sprouty RTK signaling antagonist 2	24064	0.0410845	-0.43801	Downregulated
Zfp597	zinc finger protein 597	71063	0.0110643	-0.438629	Downregulated
Lrrc57	leucine rich repeat containing 57	66606	0.0445632	-0.43868	Downregulated
Rhobtb1	Rho-related BTB domain containing 1	69288	0.0254073	-0.439252	Downregulated
Zic1	zinc finger protein of the cerebellum 1	22771	0.0400311	-0.439766	Downregulated
Lbhd1	LBH domain containing 1	102308570	0.0204784	-0.441286	Downregulated
Sipa1	signal-induced proliferation associated gene 1	20469	0.038765	-0.442487	Downregulated
Zfp846	zinc finger protein 846	244721	0.0285335	-0.44363	Downregulated
Tmem223	transmembrane protein 223	66836	0.017652	-0.443955	Downregulated
Postn	periostin, osteoblast specific factor	50706	0.0248023	-0.444716	Downregulated
Lacc1	laccase domain containing 1	210808	0.0246617	-0.446948	Downregulated
Pcolce2	procollagen C-endopeptidase enhancer 2	76477	0.0172415	-0.447618	Downregulated
Chsy1	chondroitin sulfate synthase 1	269941	0.0257993	-0.447831	Downregulated
Limch1	LIM and calponin homology domains 1	77569	0.0404276	-0.44818	Downregulated
Ccnl2	cyclin L2	56036	0.00487595	-0.44888	Downregulated
Smarca2	SWI/SNF related, matrix associated, actin dependent regulator of chromatin, subfamily a, member 2	67155	0.00829249	-0.44913	Downregulated
Map3k4	mitogen-activated protein kinase kinase kinase 4	26407	0.00833157	-0.449414	Downregulated
Plxna1	plexin A1	18844	0.0240382	-0.449526	Downregulated
Sdhaf3	succinate dehydrogenase complex assembly factor 3	71238	0.0234009	-0.450971	Downregulated
Pxmp2	peroxisomal membrane protein 2	19301	0.0346687	-0.451768	Downregulated
Zfp931	zinc finger protein 931	353208	0.0440595	-0.452339	Downregulated
Acp5	acid phosphatase 5, tartrate resistant	11433	0.00114293	-0.452458	Downregulated
4930506C21Rik	RIKEN cDNA 4930506C21 gene	75060	0.00663401	-0.452595	Downregulated
Pcdh18	protocadherin 18	73173	0.0258571	-0.453042	Downregulated
Zbtb14	zinc finger and BTB domain containing 14	22666	0.00957304	-0.453101	Downregulated
2700081O15Rik	RIKEN cDNA 2700081O15 gene	108899	0.0351904	-0.453226	Downregulated
Lama2	laminin, alpha 2	16773	0.0350375	-0.454722	Downregulated
Lpar6	lysophosphatidic acid receptor 6	67168	0.00313618	-0.454941	Downregulated
Cdh5	cadherin 5	12562	0.0321336	-0.455206	Downregulated
Inafm2	InaF motif containing 2	100043272	0.0127189	-0.455677	Downregulated
Snx10	sorting nexin 10	71982	0.00721321	-0.4557	Downregulated
Steap3	STEAP family member 3	68428	0.0313244	-0.455826	Downregulated
Adamts10	a disintegrin-like and metallopeptidase (reprolysin type) with thrombospondin type 1 motif, 10	224697	0.0105897	-0.456285	Downregulated
Tmem186	transmembrane protein 186	66690	0.0113645	-0.456445	Downregulated
Gpd1	glycerol-3-phosphate dehydrogenase 1 (soluble)	14555	0.0210794	-0.459233	Downregulated
Elovl5	ELOVL family member 5, elongation of long chain fatty acids (yeast)	68801	0.0349655	-0.459565	Downregulated
Inka1	inka box actin regulator 1	68176	0.0185137	-0.460393	Downregulated
Disp1	dispatched RND transporter family member 1	68897	0.0302476	-0.461175	Downregulated
Pank3	pantothenate kinase 3	211347	0.0113727	-0.461772	Downregulated
Plaat3	phospholipase A and acyltransferase 3	225845	0.0187504	-0.463391	Downregulated
Mapk14	mitogen-activated protein kinase 14	26416	0.0254506	-0.463498	Downregulated
Cibar1	CBY1 interacting BAR domain containing 1	68099	0.0132384	-0.464256	Downregulated
D5Ertd579e	DNA segment, Chr 5, ERATO Doi 579, expressed	320661	0.00441373	-0.465491	Downregulated
Rpl15	ribosomal protein L15	66480	0.0161882	-0.465599	Downregulated
Pgap2	post-GPI attachment to proteins 2	233575	0.0146665	-0.467829	Downregulated
Smim27	small integral membrane protein 27	100504309	0.0307824	-0.468161	Downregulated
Tpgs2	tubulin polyglutamylase complex subunit 2	66648	0.00234526	-0.469836	Downregulated
Slc46a1	solute carrier family 46, member 1	52466	0.0241767	-0.469929	Downregulated
Prnp	prion protein	19122	0.00288932	-0.47093	Downregulated
Emc6	ER membrane protein complex subunit 6	66048	0.0167801	-0.472501	Downregulated
Enah	ENAH actin regulator	13800	0.0491901	-0.47529	Downregulated
Slc35a1	solute carrier family 35 (CMP-sialic acid transporter), member 1	24060	0.0072662	-0.476392	Downregulated
Atxn1	ataxin 1	20238	0.038473	-0.484906	Downregulated
Eif4e3	eukaryotic translation initiation factor 4E member 3	66892	0.0064839	-0.485611	Downregulated
Dok4	docking protein 4	114255	0.00961922	-0.486368	Downregulated
Tusc1	tumor suppressor candidate 1	69136	0.00961851	-0.487416	Downregulated
Vac14	Vac14 homolog (S. cerevisiae)	234729	0.0119112	-0.490457	Downregulated
Slc39a10	solute carrier family 39 (zinc transporter), member 10	227059	0.00271025	-0.492331	Downregulated
Pde4b	phosphodiesterase 4B, cAMP specific	18578	0.0104121	-0.493626	Downregulated
Zhx2	zinc fingers and homeoboxes 2	387609	0.0126729	-0.494425	Downregulated
Lurap1	leucine rich adaptor protein 1	68075	0.0301825	-0.494877	Downregulated
1110008P14Rik	RIKEN cDNA 1110008P14 gene	73737	0.0311002	-0.495003	Downregulated
Nkiras1	NFKB inhibitor interacting Ras-like protein 1	69721	0.0220044	-0.495016	Downregulated
Rmdn3	regulator of microtubule dynamics 3	67809	0.0057521	-0.49631	Downregulated
Slc26a6	solute carrier family 26, member 6	171429	0.00367874	-0.496647	Downregulated
Suox	sulfite oxidase	211389	0.00339133	-0.499045	Downregulated
Rarg	retinoic acid receptor, gamma	19411	0.00572464	-0.499519	Downregulated
Stk38l	serine/threonine kinase 38 like	232533	0.00530934	-0.500665	Downregulated
Kank2	KN motif and ankyrin repeat domains 2	235041	0.0173361	-0.501552	Downregulated
Serpinf1	serine (or cysteine) peptidase inhibitor, clade F, member 1	20317	0.0362139	-0.502924	Downregulated
Tceal9	transcription elongation factor A like 9	22381	0.0182852	-0.503172	Downregulated
Stat1	signal transducer and activator of transcription 1	20846	0.0277768	-0.505211	Downregulated
Rpp14	ribonuclease P 14 subunit	67053	0.00460442	-0.505887	Downregulated
Gapdh	glyceraldehyde-3-phosphate dehydrogenase	14433	0.0208767	-0.506123	Downregulated
Rcn1	reticulocalbin 1	19672	0.0348665	-0.507887	Downregulated
Gsk3b	glycogen synthase kinase 3 beta	56637	0.00361608	-0.508156	Downregulated
Fam3c	family with sequence similarity 3, member C	27999	0.0090466	-0.508469	Downregulated
Tapbpl	TAP binding protein-like	213233	0.0237256	-0.510818	Downregulated
Sytl4	synaptotagmin-like 4	27359	0.0237093	-0.511469	Downregulated
Lfng	LFNG O-fucosylpeptide 3-beta-N-acetylglucosaminyltransferase	16848	0.00870726	-0.511654	Downregulated
Epb41l2	erythrocyte membrane protein band 4.1 like 2	13822	0.0259367	-0.512572	Downregulated
Banp	BTG3 associated nuclear protein	53325	0.014549	-0.512901	Downregulated
Ndc1	NDC1 transmembrane nucleoporin	72787	0.00897708	-0.513372	Downregulated
Ccdc28b	coiled coil domain containing 28B	66264	0.0111792	-0.514274	Downregulated
Gpld1	glycosylphosphatidylinositol specific phospholipase D1	14756	0.00806641	-0.514555	Downregulated
BC025920	zinc finger protein pseudogene	268319	0.000978976	-0.515807	Downregulated
Ndufaf4	NADH:ubiquinone oxidoreductase complex assembly factor 4	68493	0.00103545	-0.517026	Downregulated
Slc18b1	solute carrier family 18, subfamily B, member 1	76306	0.00662272	-0.517859	Downregulated
Mmp2	matrix metallopeptidase 2	17390	0.0364687	-0.518014	Downregulated
Ank	progressive ankylosis	11732	0.0327869	-0.519018	Downregulated
Tmem268	transmembrane protein 268	230279	0.00633615	-0.519308	Downregulated
Rex1bd	required for excision 1-B domain containing	66462	0.0446702	-0.521403	Downregulated
Mmab	methylmalonic aciduria (cobalamin deficiency) cblB type homolog (human)	77697	0.0265162	-0.523951	Downregulated
Mob3b	MOB kinase activator 3B	214944	0.0328898	-0.527592	Downregulated
Tspan6	tetraspanin 6	56496	0.00853337	-0.527782	Downregulated
Paox	polyamine oxidase (exo-N4-amino)	212503	0.00340964	-0.529277	Downregulated
Ext1	exostosin glycosyltransferase 1	14042	0.00459876	-0.529611	Downregulated
Htra1	HtrA serine peptidase 1	56213	0.0214019	-0.529672	Downregulated
Mblac2	metallo-beta-lactamase domain containing 2	72852	0.0171533	-0.530437	Downregulated
Slc35g1	solute carrier family 35, member G1	240660	0.00850418	-0.536091	Downregulated
Glb1l2	galactosidase, beta 1-like 2	244757	0.0382252	-0.536526	Downregulated
Afdn	afadin, adherens junction formation factor	17356	0.00801616	-0.537451	Downregulated
Dcaf6	DDB1 and CUL4 associated factor 6	74106	0.000825206	-0.537547	Downregulated
Hebp2	heme binding protein 2	56016	0.0315912	-0.54798	Downregulated
Parp16	poly (ADP-ribose) polymerase family, member 16	214424	0.0106302	-0.552484	Downregulated
Tspan15	tetraspanin 15	70423	0.00904671	-0.553552	Downregulated
Mpp1	membrane protein, palmitoylated	17524	0.00730621	-0.553887	Downregulated
Ecm2	extracellular matrix protein 2, female organ and adipocyte specific	407800	0.0202695	-0.554512	Downregulated
Gpatch11	G patch domain containing 11	53951	0.00349141	-0.556088	Downregulated
Mmp19	matrix metallopeptidase 19	58223	0.00347631	-0.556661	Downregulated
Med12l	mediator complex subunit 12-like	329650	0.0248628	-0.56103	Downregulated
Pcyt2	phosphate cytidylyltransferase 2, ethanolamine	68671	0.0352636	-0.564248	Downregulated
Pcdh17	protocadherin 17	219228	0.00810135	-0.564418	Downregulated
Afap1	actin filament associated protein 1	70292	0.0259063	-0.564513	Downregulated
P2ry2	purinergic receptor P2Y, G-protein coupled 2	18442	0.00339118	-0.565201	Downregulated
Slc1a5	solute carrier family 1 (neutral amino acid transporter), member 5	20514	0.0103477	-0.567096	Downregulated
Cmpk2	cytidine monophosphate (UMP-CMP) kinase 2, mitochondrial	22169	0.0437026	-0.568041	Downregulated
Zfp932	zinc finger protein 932	69504	0.0286203	-0.572762	Downregulated
Ccnd2	cyclin D2	12444	0.022495	-0.572931	Downregulated
Col5a1	collagen, type V, alpha 1	12831	0.0267815	-0.573655	Downregulated
Hmgcr	3-hydroxy-3-methylglutaryl-Coenzyme A reductase	15357	0.00500934	-0.574443	Downregulated
Abcc1	ATP-binding cassette, sub-family C (CFTR/MRP), member 1	17250	0.000154867	-0.574645	Downregulated
Itpka	inositol 1,4,5-trisphosphate 3-kinase A	228550	0.00275328	-0.574755	Downregulated
Cfap54	cilia and flagella associated protein 54	380654	0.0426452	-0.575506	Downregulated
Cdh13	cadherin 13	12554	0.0180436	-0.575885	Downregulated
Dusp19	dual specificity phosphatase 19	68082	0.00696859	-0.576299	Downregulated
2010003K11Rik	RIKEN cDNA 2010003K11 gene	69861	0.00292094	-0.577089	Downregulated
Snhg20	small nucleolar RNA host gene 20	76972	0.0156432	-0.577436	Downregulated
Bhlhe41	basic helix-loop-helix family, member e41	79362	0.0199311	-0.582862	Downregulated
Trim65	tripartite motif-containing 65	338364	0.000936901	-0.584007	Downregulated
Zc3h8	zinc finger CCCH type containing 8	57432	0.00357363	-0.584411	Downregulated
Gga2	golgi associated, gamma adaptin ear containing, ARF binding protein 2	74105	0.0200797	-0.584856	Downregulated
Ebf3	early B cell factor 3	13593	0.00480103	-0.588205	Downregulated
Dhx32	DEAH (Asp-Glu-Ala-His) box polypeptide 32	101437	0.0220369	-0.589539	Downregulated
Ccdc85b	coiled-coil domain containing 85B	240514	0.00481518	-0.59037	Downregulated
Pgd	phosphogluconate dehydrogenase	110208	0.0253469	-0.590932	Downregulated
Tie1	tyrosine kinase with immunoglobulin-like and EGF-like domains 1	21846	0.0162963	-0.591305	Downregulated
Rflnb	refilin B	76566	0.00478126	-0.593835	Downregulated
Camkk2	calcium/calmodulin-dependent protein kinase kinase 2, beta	207565	0.000924947	-0.5953	Downregulated
Tspan14	tetraspanin 14	52588	0.00638058	-0.598049	Downregulated
Faap100	Fanconi anemia core complex associated protein 100	71885	0.0152268	-0.59984	Downregulated
Dpy19l1	dpy-19-like 1 (C. elegans)	244745	0.000495634	-0.601499	Downregulated
Col3a1	collagen, type III, alpha 1	12825	0.0449568	-0.604124	Downregulated
Lum	lumican	17022	0.039626	-0.605154	Downregulated
Ablim3	actin binding LIM protein family, member 3	319713	0.0301767	-0.606069	Downregulated
Nxpe4	neurexophilin and PC-esterase domain family, member 4	244853	0.0289012	-0.60742	Downregulated
Tceal8	transcription elongation factor A (SII)-like 8	66684	0.00149323	-0.610743	Downregulated
Tigar	Trp53 induced glycolysis regulatory phosphatase	319801	0.00688021	-0.611294	Downregulated
Zfp467	zinc finger protein 467	68910	0.00761607	-0.612946	Downregulated
Rdh10	retinol dehydrogenase 10 (all-trans)	98711	0.000453927	-0.61587	Downregulated
Lrrc39	leucine rich repeat containing 39	109245	0.0286642	-0.616262	Downregulated
Anks1	ankyrin repeat and SAM domain containing 1	224650	0.00509229	-0.626949	Downregulated
St8sia4	ST8 alpha-N-acetyl-neuraminide alpha-2,8-sialyltransferase 4	20452	0.0155298	-0.62928	Downregulated
Ppp1r1a	protein phosphatase 1, regulatory inhibitor subunit 1A	58200	0.000626428	-0.630207	Downregulated
Fdps	farnesyl diphosphate synthetase	110196	0.0173091	-0.631586	Downregulated
Psph	phosphoserine phosphatase	100678	0.00978115	-0.631634	Downregulated
Krt79	keratin 79	223917	0.00426935	-0.634163	Downregulated
Tmem184b	transmembrane protein 184b	223693	0.0201476	-0.642574	Downregulated
Slc2a4	solute carrier family 2 (facilitated glucose transporter), member 4	20528	0.00203101	-0.645085	Downregulated
Tbc1d31	TBC1 domain family, member 31	210544	0.000921881	-0.645665	Downregulated
Cspg4	chondroitin sulfate proteoglycan 4	121021	0.0337487	-0.645804	Downregulated
Utp14b	UTP14B small subunit processome component	195434	0.0177501	-0.64984	Downregulated
Slco4a1	solute carrier organic anion transporter family, member 4a1	108115	0.0483799	-0.650583	Downregulated
Tsc22d1	TSC22 domain family, member 1	21807	0.000881664	-0.654039	Downregulated
Steap4	STEAP family member 4	117167	0.0311288	-0.654718	Downregulated
Zfp366	zinc finger protein 366	238803	0.0239247	-0.65693	Downregulated
Fsd2	fibronectin type III and SPRY domain containing 2	244091	0.0209781	-0.65779	Downregulated
Sox7	SRY (sex determining region Y)-box 7	20680	0.00866103	-0.660286	Downregulated
Kbtbd11	kelch repeat and BTB (POZ) domain containing 11	74901	0.00557762	-0.669404	Downregulated
Sipa1l2	signal-induced proliferation-associated 1 like 2	244668	0.00802199	-0.670635	Downregulated
Klhdc7a	kelch domain containing 7A	242721	0.00357561	-0.67227	Downregulated
Fgf14	fibroblast growth factor 14	14169	0.00120505	-0.673128	Downregulated
1700037H04Rik	RIKEN cDNA 1700037H04 gene	67326	0.00178763	-0.678934	Downregulated
Prkaa2	protein kinase, AMP-activated, alpha 2 catalytic subunit	108079	0.00692226	-0.681006	Downregulated
Myo5c	myosin VC	208943	0.000823747	-0.681121	Downregulated
Tspan13	tetraspanin 13	66109	0.0068824	-0.681202	Downregulated
A830018L16Rik	RIKEN cDNA A830018L16 gene	320492	0.0118279	-0.684085	Downregulated
Tmem179	transmembrane protein 179	104885	0.0203731	-0.692028	Downregulated
Casp3	caspase 3	12367	0.0119638	-0.692862	Downregulated
Col15a1	collagen, type XV, alpha 1	12819	0.025092	-0.693265	Downregulated
Polr3g	polymerase (RNA) III (DNA directed) polypeptide G	67486	0.00176464	-0.699101	Downregulated
Mir100hg	Mir100 Mirlet7a-2 Mir125b-1 cluster host gene	73144	0.00337415	-0.704042	Downregulated
Rab30	RAB30, member RAS oncogene family	75985	0.00104193	-0.70884	Downregulated
Gask1b	golgi associated kinase 1B	68659	0.00261314	-0.718113	Downregulated
Chrdl1	chordin-like 1	83453	0.042543	-0.719022	Downregulated
Pdzrn3	PDZ domain containing RING finger 3	55983	0.0184667	-0.719514	Downregulated
Rpia	ribose 5-phosphate isomerase A	19895	0.000640251	-0.728065	Downregulated
Serpinh1	serine (or cysteine) peptidase inhibitor, clade H, member 1	12406	0.00635813	-0.7301	Downregulated
Pnpla3	patatin-like phospholipase domain containing 3	116939	0.0118203	-0.730821	Downregulated
Ifi27l2a	interferon, alpha-inducible protein 27 like 2A	76933	0.0210593	-0.731627	Downregulated
Igf1	insulin-like growth factor 1	16000	0.0302983	-0.736072	Downregulated
Gss	glutathione synthetase	14854	0.000417139	-0.739264	Downregulated
Adrb1	adrenergic receptor, beta 1	11554	0.0205711	-0.74864	Downregulated
Mogat1	monoacylglycerol O-acyltransferase 1	68393	0.00213569	-0.75146	Downregulated
Tlcd2	TLC domain containing 2	380712	0.0192621	-0.753454	Downregulated
Agpat2	1-acylglycerol-3-phosphate O-acyltransferase 2 (lysophosphatidic acid acyltransferase, beta)	67512	0.00731862	-0.754668	Downregulated
Fat4	FAT atypical cadherin 4	329628	0.0116291	-0.758473	Downregulated
Msmo1	methylsterol monoxygenase 1	66234	0.000208698	-0.761268	Downregulated
Hgf	hepatocyte growth factor	15234	0.00551285	-0.769952	Downregulated
Poln	DNA polymerase N	272158	0.000681522	-0.770839	Downregulated
Tmem120b	transmembrane protein 120B	330189	0.0107629	-0.772551	Downregulated
Tent5a	terminal nucleotidyltransferase 5A	212943	0.00741868	-0.781139	Downregulated
Angptl2	angiopoietin-like 2	26360	0.00040509	-0.787065	Downregulated
Gulp1	GULP, engulfment adaptor PTB domain containing 1	70676	0.00217155	-0.792938	Downregulated
Mlxipl	MLX interacting protein-like	58805	0.00117421	-0.793097	Downregulated
Myct1	myc target 1	68632	0.00266308	-0.794322	Downregulated
Mapkapk3	mitogen-activated protein kinase-activated protein kinase 3	102626	0.000649286	-0.810725	Downregulated
Flnc	filamin C, gamma	68794	0.0353413	-0.814622	Downregulated
Slc26a10	solute carrier family 26, member 10	216441	0.00929594	-0.817876	Downregulated
Srebf1	sterol regulatory element binding transcription factor 1	20787	0.00607897	-0.819923	Downregulated
Dipk2a	divergent protein kinase domain 2A	68861	0.00056655	-0.830498	Downregulated
Sqle	squalene epoxidase	20775	0.0219448	-0.835183	Downregulated
A530016L24Rik	RIKEN cDNA A530016L24 gene	319942	0.0111431	-0.837078	Downregulated
Ushbp1	USH1 protein network component harmonin binding protein 1	234395	0.00554677	-0.846693	Downregulated
Aspn	asporin	66695	0.00370698	-0.850052	Downregulated
Stard4	StAR-related lipid transfer (START) domain containing 4	170459	0.00547309	-0.850224	Downregulated
Slc2a5	solute carrier family 2 (facilitated glucose transporter), member 5	56485	0.0263283	-0.851706	Downregulated
Angpt1	angiopoietin 1	11600	0.00305341	-0.859744	Downregulated
Cd200	CD200 antigen	17470	0.00146109	-0.866781	Downregulated
Paqr9	progestin and adipoQ receptor family member IX	75552	0.00119403	-0.874078	Downregulated
Sorl1	sortilin-related receptor, LDLR class A repeats-containing	20660	0.00632448	-0.878241	Downregulated
Isyna1	myo-inositol 1-phosphate synthase A1	71780	0.0194285	-0.88019	Downregulated
Odf3l1	outer dense fiber of sperm tails 3-like 1	382075	0.00452379	-0.897211	Downregulated
Cyp51	cytochrome P450, family 51	13121	0.000720047	-0.915446	Downregulated
Emcn	endomucin	59308	0.00245297	-0.916476	Downregulated
Esr1	estrogen receptor 1 (alpha)	13982	0.000550774	-0.920455	Downregulated
Acot11	acyl-CoA thioesterase 11	329910	0.00338393	-0.925986	Downregulated
Hk2	hexokinase 2	15277	1.54223e-05	-0.928549	Downregulated
Col1a1	collagen, type I, alpha 1	12842	0.0183813	-0.932382	Downregulated
Prkab1	protein kinase, AMP-activated, beta 1 non-catalytic subunit	19079	0.000379136	-0.941173	Downregulated
Pi16	peptidase inhibitor 16	74116	0.0154609	-0.945169	Downregulated
Dbp	D site albumin promoter binding protein	13170	0.0118465	-0.945793	Downregulated
Sc5d	sterol-C5-desaturase	235293	0.000269799	-0.952986	Downregulated
Phlda3	pleckstrin homology like domain, family A, member 3	27280	0.0101082	-0.958123	Downregulated
Hr	lysine demethylase and nuclear receptor corepressor	15460	0.023558	-0.961362	Downregulated
Ppp1r3b	protein phosphatase 1, regulatory subunit 3B	244416	0.00317089	-0.981538	Downregulated
Ldlr	low density lipoprotein receptor	16835	0.001145	-0.989589	Downregulated
Id2	inhibitor of DNA binding 2	15902	0.0164912	-0.995078	Downregulated
H2bc21	H2B clustered histone 21	319190	0.000294502	-0.998382	Downregulated
Dusp4	dual specificity phosphatase 4	319520	0.0374751	-1.00336	Downregulated
Nrep	neuronal regeneration related protein	27528	0.00444865	-1.00407	Downregulated
Aacs	acetoacetyl-CoA synthetase	78894	0.0016956	-1.02072	Downregulated
Pon1	paraoxonase 1	18979	0.00303	-1.03279	Downregulated
Acly	ATP citrate lyase	104112	0.0094966	-1.03423	Downregulated
Dhrs7	dehydrogenase/reductase (SDR family) member 7	66375	0.000597642	-1.0479	Downregulated
P2rx5	purinergic receptor P2X, ligand-gated ion channel, 5	94045	0.000927299	-1.05683	Downregulated
Neat1	nuclear paraspeckle assembly transcript 1 (non-protein coding)	66961	0.00369689	-1.0569	Downregulated
Adamtsl3	ADAMTS-like 3	269959	0.000457575	-1.07497	Downregulated
Ces1f	carboxylesterase 1F	234564	0.00144492	-1.08628	Downregulated
Insig1	insulin induced gene 1	231070	0.000479502	-1.09513	Downregulated
Sntb1	syntrophin, basic 1	20649	0.00212101	-1.11151	Downregulated
Grb14	growth factor receptor bound protein 14	50915	0.00317544	-1.12729	Downregulated
Dixdc1	DIX domain containing 1	330938	0.000723167	-1.14574	Downregulated
Thrsp	thyroid hormone responsive	21835	0.0013367	-1.17415	Downregulated
Kcnb1	potassium voltage gated channel, Shab-related subfamily, member 1	16500	0.000878689	-1.2032	Downregulated
TrnQ	tRNA	17740	0.00252908	-1.21173	Downregulated
Adap1	ArfGAP with dual PH domains 1	231821	0.00193072	-1.25616	Downregulated
Sbk1	SH3-binding kinase 1	104175	0.00213854	-1.27274	Downregulated
Fam241a	family with sequence similarity 241, member A	70617	0.000160278	-1.29192	Downregulated
Cmya5	cardiomyopathy associated 5	76469	0.0305355	-1.36353	Downregulated
Adcy10	adenylate cyclase 10	271639	0.000125207	-1.4049	Downregulated
Bhlhe40	basic helix-loop-helix family, member e40	20893	0.00328588	-1.44735	Downregulated
Angptl8	angiopoietin-like 8	624219	0.000402966	-1.48296	Downregulated
2310069B03Rik	RIKEN cDNA 2310069B03 gene	69652	0.00149336	-1.48318	Downregulated
Mid1ip1	Mid1 interacting protein 1 (gastrulation specific G12-like (zebrafish))	68041	3.7179e-06	-1.58193	Downregulated
Scd2	stearoyl-Coenzyme A desaturase 2	20250	0.00803301	-1.59162	Downregulated
Kit	KIT proto-oncogene receptor tyrosine kinase	16590	0.000352778	-1.67791	Downregulated
Tpm2	tropomyosin 2, beta	22004	0.0308535	-1.79475	Downregulated
Hephl1	hephaestin-like 1	244698	2.38525e-05	-1.82428	Downregulated
Ttc25	tetratricopeptide repeat domain 25	74407	0.000364202	-2.06523	Downregulated
Neb	nebulin	17996	0.00791357	-3.94468	Downregulated
Ttn	titin	22138	0.00926529	-6.0332	Downregulated

## Sheet: Old CE vs Young CE
Gene information			Overall p value	Log2-fold-change	DEG
Symbol	Description	Entrez ID	Old CE / Young CE	Old CE / Young CE	Old CE / Young CE
Ighm	immunoglobulin heavy constant mu	16019	1.99889e-06	3.3628	Upregulated
Kcnj15	potassium inwardly-rectifying channel, subfamily J, member 15	16516	1.53138e-05	2.57121	Upregulated
Atp1a3	ATPase, Na+/K+ transporting, alpha 3 polypeptide	232975	0.000211775	2.42594	Upregulated
Scd2	stearoyl-Coenzyme A desaturase 2	20250	0.000147297	2.15881	Upregulated
Ryr2	ryanodine receptor 2, cardiac	20191	6.67614e-05	2.07107	Upregulated
Prune2	prune homolog 2	353211	0.000250631	2.0391	Upregulated
Slc2a5	solute carrier family 2 (facilitated glucose transporter), member 5	56485	0.000472859	1.99859	Upregulated
Ttc25	tetratricopeptide repeat domain 25	74407	0.000950367	1.81417	Upregulated
Acly	ATP citrate lyase	104112	0.000702733	1.78517	Upregulated
A530016L24Rik	RIKEN cDNA A530016L24 gene	319942	0.000149792	1.66235	Upregulated
Zfp36l2	zinc finger protein 36, C3H type-like 2	12193	0.000167127	1.6025	Upregulated
Me1	malic enzyme 1, NADP(+)-dependent, cytosolic	17436	0.00167647	1.57571	Upregulated
Nap1l5	nucleosome assembly protein 1-like 5	58243	1.37382e-05	1.5489	Upregulated
Hilpda	hypoxia inducible lipid droplet associated	69573	0.000570478	1.52444	Upregulated
Acss2	acyl-CoA synthetase short-chain family member 2	60525	0.000696072	1.51367	Upregulated
Lyz2	lysozyme 2	17105	0.00236236	1.39372	Upregulated
Abcd2	ATP-binding cassette, sub-family D (ALD), member 2	26874	0.000546878	1.38886	Upregulated
Sh3tc1	SH3 domain and tetratricopeptide repeats 1	231147	0.000557963	1.38271	Upregulated
Med10	mediator complex subunit 10	28077	5.45838e-05	1.37508	Upregulated
Sncg	synuclein, gamma	20618	0.00329015	1.37405	Upregulated
Mpeg1	macrophage expressed gene 1	17476	0.00112951	1.34053	Upregulated
Apod	apolipoprotein D	11815	0.00128749	1.32464	Upregulated
Fer1l6	fer-1-like 6 (C. elegans)	631797	0.000141039	1.32328	Upregulated
Ctss	cathepsin S	13040	0.00122512	1.3144	Upregulated
Fabp5	fatty acid binding protein 5, epidermal	16592	0.00247099	1.30458	Upregulated
H2-Ab1	histocompatibility 2, class II antigen A, beta 1	14961	0.0004954	1.2823	Upregulated
Ptger3	prostaglandin E receptor 3 (subtype EP3)	19218	0.000314159	1.2624	Upregulated
Pnldc1	poly(A)-specific ribonuclease (PARN)-like domain containing 1	240023	0.000491529	1.25868	Upregulated
Ptprc	protein tyrosine phosphatase, receptor type, C	19264	0.00107992	1.24615	Upregulated
Comt	catechol-O-methyltransferase	12846	0.00184433	1.24499	Upregulated
Hba-a1	hemoglobin alpha, adult chain 1	15122	0.000716851	1.24469	Upregulated
H2-Aa	histocompatibility 2, class II antigen A, alpha	14960	0.00172696	1.23717	Upregulated
Dock2	dedicator of cyto-kinesis 2	94176	0.00214437	1.223	Upregulated
Clec2d	C-type lectin domain family 2, member d	93694	0.00211197	1.20044	Upregulated
Dlc1	deleted in liver cancer 1	50768	0.00130352	1.17889	Upregulated
Myo5b	myosin VB	17919	0.000820556	1.17649	Upregulated
Cd74	CD74 antigen (invariant polypeptide of major histocompatibility complex, class II antigen-associated)	16149	0.000355789	1.16291	Upregulated
Sntb1	syntrophin, basic 1	20649	0.0166228	1.15874	Upregulated
Unc119	unc-119 lipid binding chaperone	22248	0.000190572	1.15832	Upregulated
Ccdc3	coiled-coil domain containing 3	74186	0.000419881	1.15729	Upregulated
Ano1	anoctamin 1, calcium activated chloride channel	101772	0.00100069	1.14009	Upregulated
Adgre1	adhesion G protein-coupled receptor E1	13733	0.00162989	1.13766	Upregulated
Fbxo21	F-box protein 21	231670	0.000454219	1.13187	Upregulated
Nsdhl	NAD(P) dependent steroid dehydrogenase-like	18194	0.000332361	1.12638	Upregulated
Lcp1	lymphocyte cytosolic protein 1	18826	0.000790625	1.11924	Upregulated
Hba-a2	hemoglobin alpha, adult chain 2	110257	0.000711106	1.11594	Upregulated
Strip2	striatin interacting protein 2	320609	0.00653964	1.10924	Upregulated
Tmem179	transmembrane protein 179	104885	0.00272971	1.10919	Upregulated
Cybb	cytochrome b-245, beta polypeptide	13058	0.00283692	1.10806	Upregulated
Thrsp	thyroid hormone responsive	21835	0.00271902	1.10355	Upregulated
Hbb-bt	hemoglobin, beta adult t chain	101488143	0.00108185	1.09493	Upregulated
Lilr4b	leukocyte immunoglobulin-like receptor, subfamily B, member 4B	14727	0.000278673	1.08913	Upregulated
Vsir	V-set immunoregulatory receptor	74048	0.00311464	1.07571	Upregulated
Gas6	growth arrest specific 6	14456	0.00262399	1.06777	Upregulated
Nudt4	nudix (nucleoside diphosphate linked moiety X)-type motif 4	71207	0.0013079	1.0625	Upregulated
Tlcd3b	TLC domain containing 3B	68952	0.0012272	1.05497	Upregulated
Acsl3	acyl-CoA synthetase long-chain family member 3	74205	0.00505734	1.05343	Upregulated
Adprhl1	ADP-ribosylhydrolase like 1	234072	0.00325506	1.05163	Upregulated
Oscp1	organic solute carrier partner 1	230751	0.0021281	1.05106	Upregulated
Fcgr3	Fc receptor, IgG, low affinity III	14131	0.000593418	1.04849	Upregulated
Tmem176a	transmembrane protein 176A	66058	0.000724732	1.04184	Upregulated
Pgd	phosphogluconate dehydrogenase	110208	0.00502655	1.02308	Upregulated
Tmem182	transmembrane protein 182	381339	0.010608	1.01272	Upregulated
Npr3	natriuretic peptide receptor 3	18162	0.00418783	1.00312	Upregulated
Atp13a2	ATPase type 13A2	74772	0.00158356	0.99674	Upregulated
Tfr2	transferrin receptor 2	50765	0.0090163	0.990935	Upregulated
Ccr2	chemokine (C-C motif) receptor 2	12772	0.0194273	0.988903	Upregulated
Tmem45b	transmembrane protein 45b	235135	0.00620921	0.976622	Upregulated
Impa2	inositol monophosphatase 2	114663	0.000868161	0.976209	Upregulated
C1qc	complement component 1, q subcomponent, C chain	12262	0.00412762	0.975194	Upregulated
Hk1	hexokinase 1	15275	0.000633386	0.973419	Upregulated
Fcgr2b	Fc receptor, IgG, low affinity IIb	14130	0.00395859	0.969729	Upregulated
Slc25a1	solute carrier family 25 (mitochondrial carrier, citrate transporter), member 1	13358	0.00882213	0.96781	Upregulated
Camk2b	calcium/calmodulin-dependent protein kinase II, beta	12323	0.00219307	0.96608	Upregulated
Ripk4	receptor-interacting serine-threonine kinase 4	72388	0.00348852	0.959844	Upregulated
Klhdc7a	kelch domain containing 7A	242721	0.00683309	0.953204	Upregulated
C3ar1	complement component 3a receptor 1	12267	0.0392238	0.95199	Upregulated
Lrrc27	leucine rich repeat containing 27	76612	0.000421981	0.951448	Upregulated
H2-Eb1	histocompatibility 2, class II antigen E beta	14969	0.00249744	0.946623	Upregulated
Arap1	ArfGAP with RhoGAP domain, ankyrin repeat and PH domain 1	69710	0.000533342	0.94598	Upregulated
Deptor	DEP domain containing MTOR-interacting protein	97998	0.00400885	0.945609	Upregulated
Hsd11b1	hydroxysteroid 11-beta dehydrogenase 1	15483	0.00351645	0.936183	Upregulated
Hbb-bs	hemoglobin, beta adult s chain	100503605	0.0031092	0.928187	Upregulated
Tmem176b	transmembrane protein 176B	65963	0.00117218	0.925914	Upregulated
Sorl1	sortilin-related receptor, LDLR class A repeats-containing	20660	0.00865874	0.920524	Upregulated
Tbc1d31	TBC1 domain family, member 31	210544	0.00973192	0.912909	Upregulated
Ttc7	tetratricopeptide repeat domain 7	225049	0.00321428	0.90777	Upregulated
Tkt	transketolase	21881	0.00781873	0.907618	Upregulated
C1qa	complement component 1, q subcomponent, alpha polypeptide	12259	0.00418721	0.904227	Upregulated
Mal2	mal, T cell differentiation protein 2	105853	0.0125637	0.899437	Upregulated
Sorcs2	sortilin-related VPS10 domain containing receptor 2	81840	0.0110662	0.893975	Upregulated
Cfp	complement factor properdin	18636	0.0101514	0.891112	Upregulated
Plin2	perilipin 2	11520	0.00156202	0.882324	Upregulated
Trarg1	trafficking regulator of GLUT4 (SLC2A4) 1	237858	0.0104966	0.881149	Upregulated
Npc2	NPC intracellular cholesterol transporter 2	67963	0.00308224	0.880206	Upregulated
Aldh1a7	aldehyde dehydrogenase family 1, subfamily A7	26358	0.0165709	0.880106	Upregulated
Mgst2	microsomal glutathione S-transferase 2	211666	0.00919071	0.876145	Upregulated
B2m	beta-2 microglobulin	12010	0.00390258	0.870953	Upregulated
Psmb9	proteasome (prosome, macropain) subunit, beta type 9 (large multifunctional peptidase 2)	16912	0.00103732	0.870166	Upregulated
Fam102a	family with sequence similarity 102, member A	98952	0.000633728	0.870154	Upregulated
Mr1	major histocompatibility complex, class I-related	15064	0.000398019	0.866009	Upregulated
Gfpt2	glutamine fructose-6-phosphate transaminase 2	14584	0.00259666	0.865771	Upregulated
Tyrobp	TYRO protein tyrosine kinase binding protein	22177	0.0130331	0.862636	Upregulated
Gldn	gliomedin	235379	0.00217303	0.861801	Upregulated
Nipsnap1	nipsnap homolog 1	18082	0.00331642	0.855858	Upregulated
Smoc1	SPARC related modular calcium binding 1	64075	0.0134659	0.854953	Upregulated
Igfbp5	insulin-like growth factor binding protein 5	16011	0.00723617	0.85286	Upregulated
Pld4	phospholipase D family, member 4	104759	0.00298675	0.850794	Upregulated
Ptafr	platelet-activating factor receptor	19204	0.00934624	0.850679	Upregulated
Unc93b1	unc-93 homolog B1, TLR signaling regulator	54445	0.00419753	0.850185	Upregulated
Nr1d1	nuclear receptor subfamily 1, group D, member 1	217166	0.0485654	0.847379	Upregulated
Csf1r	colony stimulating factor 1 receptor	12978	0.00704676	0.837981	Upregulated
Cp	ceruloplasmin	12870	0.00968455	0.837952	Upregulated
Ecscr	endothelial cell surface expressed chemotaxis and apoptosis regulator	68545	0.00213351	0.837115	Upregulated
Tspan18	tetraspanin 18	241556	0.00240348	0.834081	Upregulated
Chn1	chimerin 1	108699	0.00486968	0.81912	Upregulated
Rnf181	ring finger protein 181	66510	0.00729694	0.808968	Upregulated
Itih5	inter-alpha (globulin) inhibitor H5	209378	0.00353227	0.806431	Upregulated
Rims4	regulating synaptic membrane exocytosis 4	241770	0.00805746	0.805982	Upregulated
Nckap1l	NCK associated protein 1 like	105855	0.00947254	0.804163	Upregulated
Ctsc	cathepsin C	13032	0.00199922	0.803798	Upregulated
Acat2	acetyl-Coenzyme A acetyltransferase 2	110460	0.00606768	0.800615	Upregulated
Plek	pleckstrin	56193	0.000283158	0.798856	Upregulated
Coq8a	coenzyme Q8A	67426	0.00324407	0.798649	Upregulated
Anxa2	annexin A2	12306	0.00540636	0.797474	Upregulated
Coro1a	coronin, actin binding protein 1A	12721	0.00544068	0.792828	Upregulated
Ptpn14	protein tyrosine phosphatase, non-receptor type 14	19250	0.0104504	0.792568	Upregulated
Pim1	proviral integration site 1	18712	0.023903	0.790984	Upregulated
Ier3	immediate early response 3	15937	0.00628257	0.789947	Upregulated
Ttyh2	tweety family member 2	117160	0.0211886	0.785578	Upregulated
Gbp4	guanylate binding protein 4	17472	0.0257986	0.783644	Upregulated
Hebp2	heme binding protein 2	56016	0.00463914	0.78308	Upregulated
Ier5	immediate early response 5	15939	0.00418385	0.778834	Upregulated
Usp18	ubiquitin specific peptidase 18	24110	4.71472e-05	0.776445	Upregulated
Odf3l1	outer dense fiber of sperm tails 3-like 1	382075	0.0142068	0.776215	Upregulated
Fam20c	family with sequence similarity 20, member C	80752	0.00547669	0.775441	Upregulated
Gbp2	guanylate binding protein 2	14469	0.00131206	0.772805	Upregulated
Spaca1	sperm acrosome associated 1	67652	0.000366908	0.764846	Upregulated
Myh14	myosin, heavy polypeptide 14	71960	0.00789434	0.76405	Upregulated
Iigp1	interferon inducible GTPase 1	60440	0.0169507	0.763837	Upregulated
S1pr3	sphingosine-1-phosphate receptor 3	13610	0.00894135	0.763684	Upregulated
Cystm1	cysteine-rich transmembrane module containing 1	66060	0.00911899	0.759841	Upregulated
Phlda3	pleckstrin homology like domain, family A, member 3	27280	0.00441467	0.758964	Upregulated
H2-DMa	histocompatibility 2, class II, locus DMa	14998	0.0024014	0.757858	Upregulated
Cldn5	claudin 5	12741	0.0236755	0.75756	Upregulated
Atp4b	ATPase, H+/K+ exchanging, beta polypeptide	11945	0.0412893	0.75723	Upregulated
Rassf9	Ras association (RalGDS/AF-6) domain family (N-terminal) member 9	237504	0.00226748	0.756146	Upregulated
Rbp4	retinol binding protein 4, plasma	19662	0.0124665	0.755604	Upregulated
Stab1	stabilin 1	192187	0.00437671	0.751752	Upregulated
H2bc6	H2B clustered histone 6	319179	0.00497129	0.749103	Upregulated
C1qb	complement component 1, q subcomponent, beta polypeptide	12260	0.0124114	0.748755	Upregulated
Sh3pxd2b	SH3 and PX domains 2B	268396	0.0168559	0.739659	Upregulated
Egln3	egl-9 family hypoxia-inducible factor 3	112407	0.00718833	0.736239	Upregulated
Mgp	matrix Gla protein	17313	0.00426244	0.73332	Upregulated
Fcer1g	Fc receptor, IgE, high affinity I, gamma polypeptide	14127	0.00221519	0.732451	Upregulated
C130074G19Rik	RIKEN cDNA C130074G19 gene	226777	0.0141996	0.729654	Upregulated
H2bc4	H2B clustered histone 4	68024	0.0121759	0.728979	Upregulated
Abca9	ATP-binding cassette, sub-family A (ABC1), member 9	217262	0.00980587	0.727655	Upregulated
Slc35e3	solute carrier family 35, member E3	215436	0.0255611	0.724341	Upregulated
Mfsd12	major facilitator superfamily domain containing 12	73822	0.0157262	0.719544	Upregulated
Tlr8	toll-like receptor 8	170744	0.00525407	0.719409	Upregulated
Atp10a	ATPase, class V, type 10A	11982	0.0154827	0.718846	Upregulated
Wdfy4	WD repeat and FYVE domain containing 4	545030	0.0190939	0.716924	Upregulated
Ube2l6	ubiquitin-conjugating enzyme E2L 6	56791	0.00486671	0.714097	Upregulated
Orm1	orosomucoid 1	18405	0.0346018	0.708673	Upregulated
Ptges	prostaglandin E synthase	64292	0.0078995	0.708556	Upregulated
Ak4	adenylate kinase 4	11639	0.00168012	0.708483	Upregulated
Gimap4	GTPase, IMAP family member 4	107526	0.000955457	0.707701	Upregulated
Ehd4	EH-domain containing 4	98878	0.00643891	0.706625	Upregulated
Ostf1	osteoclast stimulating factor 1	20409	0.00275844	0.706157	Upregulated
Gja1	gap junction protein, alpha 1	14609	0.000229156	0.704506	Upregulated
Sh3bp5	SH3-domain binding protein 5 (BTK-associated)	24056	0.000316679	0.702789	Upregulated
Enpp5	ectonucleotide pyrophosphatase/phosphodiesterase 5	83965	0.00409744	0.702177	Upregulated
H2-D1	histocompatibility 2, D region locus 1	14964	0.00470812	0.701686	Upregulated
Crot	carnitine O-octanoyltransferase	74114	0.0125986	0.695587	Upregulated
Laptm5	lysosomal-associated protein transmembrane 5	16792	0.00962115	0.69361	Upregulated
Fcrls	Fc receptor-like S, scavenger receptor	80891	0.00461906	0.684762	Upregulated
Ifitm3	interferon induced transmembrane protein 3	66141	0.0168493	0.68408	Upregulated
Gale	galactose-4-epimerase, UDP	74246	0.00710129	0.683473	Upregulated
Rassf2	Ras association (RalGDS/AF-6) domain family member 2	215653	0.00749794	0.682928	Upregulated
Cd84	CD84 antigen	12523	0.0340039	0.677512	Upregulated
Cul9	cullin 9	78309	0.0342838	0.677379	Upregulated
Lima1	LIM domain and actin binding 1	65970	0.00260895	0.676522	Upregulated
Ank	progressive ankylosis	11732	0.00650368	0.675521	Upregulated
Kbtbd11	kelch repeat and BTB (POZ) domain containing 11	74901	0.0171662	0.67398	Upregulated
Nedd4l	neural precursor cell expressed, developmentally down-regulated gene 4-like	83814	0.00638613	0.67301	Upregulated
Pf4	platelet factor 4	56744	0.0396211	0.670872	Upregulated
Hdac6	histone deacetylase 6	15185	0.00753993	0.670865	Upregulated
Marchf1	membrane associated ring-CH-type finger 1	72925	0.0121778	0.664519	Upregulated
H2-T23	histocompatibility 2, T region locus 23	15040	0.0131857	0.663821	Upregulated
Tmc6	transmembrane channel-like gene family 6	217353	0.00085232	0.660553	Upregulated
Slc38a10	solute carrier family 38, member 10	72055	0.0472206	0.659277	Upregulated
Plxnb2	plexin B2	140570	0.0137257	0.657218	Upregulated
Dnajc22	DnaJ heat shock protein family (Hsp40) member C22	72778	0.0377572	0.656864	Upregulated
Lrrc32	leucine rich repeat containing 32	434215	0.0316059	0.656091	Upregulated
Rap1gap	Rap1 GTPase-activating protein	110351	0.0290138	0.654175	Upregulated
Itgb2	integrin beta 2	16414	0.00593817	0.651664	Upregulated
Sorbs2	sorbin and SH3 domain containing 2	234214	0.00476505	0.647757	Upregulated
Mmp3	matrix metallopeptidase 3	17392	0.0320198	0.646701	Upregulated
Rasl12	RAS-like, family 12	70784	0.00518396	0.644313	Upregulated
H2-K1	histocompatibility 2, K1, K region	14972	0.00727646	0.63749	Upregulated
Prmt2	protein arginine N-methyltransferase 2	15468	0.00927337	0.636276	Upregulated
Rasa4	RAS p21 protein activator 4	54153	0.0114991	0.632612	Upregulated
Fbln2	fibulin 2	14115	0.00990249	0.628751	Upregulated
Rpp40	ribonuclease P 40 subunit	208366	0.031389	0.624981	Upregulated
Commd10	COMM domain containing 10	69456	0.0177172	0.623837	Upregulated
Fads1	fatty acid desaturase 1	76267	0.00694578	0.623181	Upregulated
Ms4a6b	membrane-spanning 4-domains, subfamily A, member 6B	69774	0.0137769	0.622791	Upregulated
Arhgap30	Rho GTPase activating protein 30	226652	0.00194682	0.622278	Upregulated
Eef2kmt	eukaryotic elongation factor 2 lysine methyltransferase	70511	0.00934249	0.6209	Upregulated
Hspa12a	heat shock protein 12A	73442	0.0028771	0.620204	Upregulated
Il10ra	interleukin 10 receptor, alpha	16154	0.00993163	0.620155	Upregulated
Alas2	aminolevulinic acid synthase 2, erythroid	11656	0.00390158	0.616028	Upregulated
Marcks	myristoylated alanine rich protein kinase C substrate	17118	0.00252085	0.615355	Upregulated
Crispld2	cysteine-rich secretory protein LCCL domain containing 2	78892	0.034336	0.613873	Upregulated
Epb41l2	erythrocyte membrane protein band 4.1 like 2	13822	0.0136749	0.613725	Upregulated
Akna	AT-hook transcription factor	100182	0.0113114	0.613374	Upregulated
Pnpla3	patatin-like phospholipase domain containing 3	116939	0.0192507	0.612944	Upregulated
Fxyd5	FXYD domain-containing ion transport regulator 5	18301	0.00838466	0.612583	Upregulated
Fbp2	fructose bisphosphatase 2	14120	0.0246234	0.607651	Upregulated
Stk39	serine/threonine kinase 39	53416	0.00991501	0.606167	Upregulated
H1f3	H1.3 linker histone, cluster member	14957	0.0131242	0.606077	Upregulated
Matn2	matrilin 2	17181	0.0119829	0.60559	Upregulated
Atp8a1	ATPase, aminophospholipid transporter (APLT), class I, type 8A, member 1	11980	0.0230689	0.604772	Upregulated
Dok6	docking protein 6	623279	0.0448158	0.603751	Upregulated
Akr1e1	aldo-keto reductase family 1, member E1	56043	0.00640548	0.601504	Upregulated
Arhgdib	Rho, GDP dissociation inhibitor (GDI) beta	11857	0.00487629	0.600768	Upregulated
Ahcyl2	S-adenosylhomocysteine hydrolase-like 2	74340	0.0217644	0.597829	Upregulated
Kcnb1	potassium voltage gated channel, Shab-related subfamily, member 1	16500	0.016401	0.596494	Upregulated
Sh2b2	SH2B adaptor protein 2	23921	0.00582605	0.594116	Upregulated
Sema4c	sema domain, immunoglobulin domain (Ig), transmembrane domain (TM) and short cytoplasmic domain, (semaphorin) 4C	20353	0.0147633	0.592548	Upregulated
Pclo	piccolo (presynaptic cytomatrix protein)	26875	0.0497473	0.59103	Upregulated
Ccdc80	coiled-coil domain containing 80	67896	0.0276532	0.589458	Upregulated
Klhdc1	kelch domain containing 1	271005	0.0317691	0.588691	Upregulated
Irf8	interferon regulatory factor 8	15900	0.00738904	0.587052	Upregulated
Adamts1	a disintegrin-like and metallopeptidase (reprolysin type) with thrombospondin type 1 motif, 1	11504	0.0327228	0.587016	Upregulated
Ptp4a3	protein tyrosine phosphatase 4a3	19245	0.00598853	0.585868	Upregulated
Mtap	methylthioadenosine phosphorylase	66902	0.014805	0.584438	Upregulated
Cdk6	cyclin-dependent kinase 6	12571	0.0290536	0.58375	Upregulated
Dab2	disabled 2, mitogen-responsive phosphoprotein	13132	0.00113918	0.58275	Upregulated
G6pdx	glucose-6-phosphate dehydrogenase X-linked	14381	0.0498915	0.580875	Upregulated
Smagp	small cell adhesion glycoprotein	207818	0.00471426	0.579996	Upregulated
Cd68	CD68 antigen	12514	0.0219352	0.578225	Upregulated
Tnfrsf12a	tumor necrosis factor receptor superfamily, member 12a	27279	0.00936522	0.575632	Upregulated
Dnajc9	DnaJ heat shock protein family (Hsp40) member C9	108671	0.0153799	0.573267	Upregulated
Ephx1	epoxide hydrolase 1, microsomal	13849	0.0336059	0.573177	Upregulated
Cavin1	caveolae associated 1	19285	0.0368322	0.569264	Upregulated
Khk	ketohexokinase	16548	0.0220696	0.568715	Upregulated
Eif4ebp1	eukaryotic translation initiation factor 4E binding protein 1	13685	0.00520179	0.568001	Upregulated
Ugp2	UDP-glucose pyrophosphorylase 2	216558	0.0129046	0.567341	Upregulated
Jazf1	JAZF zinc finger 1	231986	0.00529596	0.566683	Upregulated
Slc9a9	solute carrier family 9 (sodium/hydrogen exchanger), member 9	331004	0.016747	0.566561	Upregulated
Vat1	vesicle amine transport 1	26949	0.0269094	0.566427	Upregulated
Pygl	liver glycogen phosphorylase	110095	0.0394173	0.562562	Upregulated
Parp8	poly (ADP-ribose) polymerase family, member 8	52552	0.0184997	0.562398	Upregulated
Vcam1	vascular cell adhesion molecule 1	22329	0.0118454	0.562321	Upregulated
Psmb8	proteasome (prosome, macropain) subunit, beta type 8 (large multifunctional peptidase 7)	16913	0.0403035	0.561973	Upregulated
Zfp932	zinc finger protein 932	69504	0.00810336	0.559796	Upregulated
Slc25a10	solute carrier family 25 (mitochondrial carrier, dicarboxylate transporter), member 10	27376	0.0407367	0.559517	Upregulated
Casp3	caspase 3	12367	0.0104476	0.558945	Upregulated
Inpp5d	inositol polyphosphate-5-phosphatase D	16331	0.00516547	0.558491	Upregulated
Ing2	inhibitor of growth family, member 2	69260	0.00656991	0.555691	Upregulated
Fmo5	flavin containing monooxygenase 5	14263	0.0157209	0.5542	Upregulated
Mrps6	mitochondrial ribosomal protein S6	121022	0.00196395	0.552876	Upregulated
Hgf	hepatocyte growth factor	15234	0.00921592	0.552143	Upregulated
Zfp395	zinc finger protein 395	380912	0.0125508	0.551778	Upregulated
Ttc8	tetratricopeptide repeat domain 8	76260	0.00419002	0.551214	Upregulated
Sc5d	sterol-C5-desaturase	235293	0.0175972	0.551184	Upregulated
Slc22a3	solute carrier family 22 (organic cation transporter), member 3	20519	0.0335011	0.549826	Upregulated
Lgals9	lectin, galactose binding, soluble 9	16859	0.0455085	0.549729	Upregulated
Hat1	histone aminotransferase 1	107435	0.0253704	0.549359	Upregulated
Col18a1	collagen, type XVIII, alpha 1	12822	0.0359454	0.546176	Upregulated
Scd1	stearoyl-Coenzyme A desaturase 1	20249	0.0116545	0.544733	Upregulated
Tbc1d32	TBC1 domain family, member 32	544696	0.0298116	0.544395	Upregulated
Tlr4	toll-like receptor 4	21898	0.00678562	0.542938	Upregulated
Rnf213	ring finger protein 213	672511	0.0357365	0.542933	Upregulated
Ctnna1	catenin (cadherin associated protein), alpha 1	12385	0.0115711	0.542852	Upregulated
Fnbp1	formin binding protein 1	14269	0.0176663	0.542586	Upregulated
Sfxn4	sideroflexin 4	94281	0.0281886	0.538401	Upregulated
Lcmt1	leucine carboxyl methyltransferase 1	30949	0.0373071	0.5374	Upregulated
Dhx32	DEAH (Asp-Glu-Ala-His) box polypeptide 32	101437	0.0103986	0.536864	Upregulated
Mfge8	milk fat globule-EGF factor 8 protein	17304	0.0280242	0.536415	Upregulated
Mfng	MFNG O-fucosylpeptide 3-beta-N-acetylglucosaminyltransferase	17305	0.0147413	0.536198	Upregulated
H2-Q4	histocompatibility 2, Q region locus 4	15015	0.046214	0.535139	Upregulated
Csf2rb	colony stimulating factor 2 receptor, beta, low-affinity (granulocyte-macrophage)	12983	0.0221018	0.534632	Upregulated
Cd53	CD53 antigen	12508	0.0400824	0.534066	Upregulated
Cd163	CD163 antigen	93671	0.00516485	0.534025	Upregulated
Lrrfip1	leucine rich repeat (in FLII) interacting protein 1	16978	0.016245	0.533732	Upregulated
Anxa7	annexin A7	11750	0.00216671	0.533572	Upregulated
Mcm8	minichromosome maintenance 8 homologous recombination repair factor	66634	0.0142768	0.533378	Upregulated
Tent5c	terminal nucleotidyltransferase 5C	74645	0.0358882	0.531737	Upregulated
Cxcl9	chemokine (C-X-C motif) ligand 9	17329	0.011486	0.531546	Upregulated
Acy3	aspartoacylase (aminoacylase) 3	71670	0.0234107	0.531134	Upregulated
Mmrn2	multimerin 2	105450	0.0483546	0.529205	Upregulated
Pltp	phospholipid transfer protein	18830	0.0135992	0.527489	Upregulated
Cyth4	cytohesin 4	72318	0.0274997	0.527453	Upregulated
Lacc1	laccase domain containing 1	210808	0.0463489	0.525621	Upregulated
Cep250	centrosomal protein 250	16328	0.0179777	0.524152	Upregulated
Ifi203	interferon activated gene 203	15950	0.0429557	0.523198	Upregulated
Mtss1	MTSS I-BAR domain containing 1	211401	0.0133692	0.522546	Upregulated
Rpa1	replication protein A1	68275	0.036597	0.521628	Upregulated
Slc8a1	solute carrier family 8 (sodium/calcium exchanger), member 1	20541	0.000734015	0.520487	Upregulated
Cers4	ceramide synthase 4	67260	0.00911517	0.519237	Upregulated
Rcbtb2	regulator of chromosome condensation (RCC1) and BTB (POZ) domain containing protein 2	105670	0.0238215	0.517178	Upregulated
Fam151b	family with sequence similarity 151, member B	73942	0.00735516	0.515969	Upregulated
Pfdn2	prefoldin 2	18637	0.0135577	0.512851	Upregulated
Acaca	acetyl-Coenzyme A carboxylase alpha	107476	0.0409187	0.512258	Upregulated
Gng2	guanine nucleotide binding protein (G protein), gamma 2	14702	0.0417448	0.511987	Upregulated
Acot2	acyl-CoA thioesterase 2	171210	0.0189571	0.511654	Upregulated
Alpk1	alpha-kinase 1	71481	0.0272961	0.510881	Upregulated
Ntrk3	neurotrophic tyrosine kinase, receptor, type 3	18213	0.0339689	0.51046	Upregulated
Osmr	oncostatin M receptor	18414	0.00841976	0.506095	Upregulated
Zc3h6	zinc finger CCCH type containing 6	78751	0.019977	0.505251	Upregulated
Mmd	monocyte to macrophage differentiation-associated	67468	0.0343254	0.50348	Upregulated
Mlkl	mixed lineage kinase domain-like	74568	0.00323404	0.503449	Upregulated
Sae1	SUMO1 activating enzyme subunit 1	56459	0.00439814	0.503417	Upregulated
Raver2	ribonucleoprotein, PTB-binding 2	242570	0.0367819	0.503171	Upregulated
Trim68	tripartite motif-containing 68	101700	0.00750748	0.502201	Upregulated
Cd33	CD33 antigen	12489	0.0146494	0.501688	Upregulated
Grb14	growth factor receptor bound protein 14	50915	0.0236833	0.501554	Upregulated
Cyba	cytochrome b-245, alpha polypeptide	13057	0.0333701	0.50069	Upregulated
Man1c1	mannosidase, alpha, class 1C, member 1	230815	0.0292801	0.500261	Upregulated
Cygb	cytoglobin	114886	0.0058961	0.499758	Upregulated
Hebp1	heme binding protein 1	15199	0.0473466	0.497797	Upregulated
Arhgap45	Rho GTPase activating protein 45	70719	0.0341638	0.497203	Upregulated
Tmem120b	transmembrane protein 120B	330189	0.0364907	0.495869	Upregulated
Slfn2	schlafen 2	20556	0.0177734	0.495523	Upregulated
Dhcr24	24-dehydrocholesterol reductase	74754	0.00297077	0.494661	Upregulated
Mgst1	microsomal glutathione S-transferase 1	56615	0.0478457	0.494361	Upregulated
Prss36	protease, serine 36	77613	0.00886828	0.493787	Upregulated
Tmem164	transmembrane protein 164	209497	0.00915601	0.493683	Upregulated
Glb1	galactosidase, beta 1	12091	0.00715335	0.49133	Upregulated
Pir	pirin	69656	0.0464897	0.490255	Upregulated
Sh3bgrl3	SH3 domain binding glutamic acid-rich protein-like 3	73723	0.00753328	0.489872	Upregulated
Tle5	TLE family member 5, transcriptional modulator	14797	0.0471048	0.488662	Upregulated
Gnai2	guanine nucleotide binding protein (G protein), alpha inhibiting 2	14678	0.012234	0.488202	Upregulated
Vim	vimentin	22352	0.0472659	0.488081	Upregulated
Sugct	succinyl-CoA glutarate-CoA transferase	192136	0.0289874	0.48789	Upregulated
Irf5	interferon regulatory factor 5	27056	0.0174313	0.487735	Upregulated
Tysnd1	trypsin domain containing 1	71767	0.0258409	0.486402	Upregulated
Mill2	MHC I like leukocyte 2	243864	0.0186533	0.485675	Upregulated
Dcaf4	DDB1 and CUL4 associated factor 4	73828	0.00719466	0.48553	Upregulated
Farp1	FERM, RhoGEF (Arhgef) and pleckstrin domain protein 1 (chondrocyte-derived)	223254	0.0210812	0.485193	Upregulated
Tap1	transporter 1, ATP-binding cassette, sub-family B (MDR/TAP)	21354	0.0456863	0.483844	Upregulated
Prex1	phosphatidylinositol-3,4,5-trisphosphate-dependent Rac exchange factor 1	277360	0.016971	0.483318	Upregulated
Pm20d1	peptidase M20 domain containing 1	212933	0.0157545	0.481631	Upregulated
Apobec1	apolipoprotein B mRNA editing enzyme, catalytic polypeptide 1	11810	0.0470495	0.481502	Upregulated
Micu2	mitochondrial calcium uptake 2	68514	0.0347658	0.48117	Upregulated
Plat	plasminogen activator, tissue	18791	0.0417595	0.48066	Upregulated
Ptpn9	protein tyrosine phosphatase, non-receptor type 9	56294	0.0202462	0.480201	Upregulated
Stbd1	starch binding domain 1	52331	0.0161459	0.478545	Upregulated
Atp8b1	ATPase, class I, type 8B, member 1	54670	0.023973	0.478164	Upregulated
Rab6b	RAB6B, member RAS oncogene family	270192	0.0248352	0.477199	Upregulated
Sft2d2	SFT2 domain containing 2	108735	0.0455108	0.476249	Upregulated
Bcl2	B cell leukemia/lymphoma 2	12043	0.0264142	0.476148	Upregulated
Msr1	macrophage scavenger receptor 1	20288	0.0350405	0.476034	Upregulated
Fig4	FIG4 phosphoinositide 5-phosphatase	103199	0.0379153	0.4757	Upregulated
Psmb10	proteasome (prosome, macropain) subunit, beta type 10	19171	0.0360567	0.475358	Upregulated
Fermt3	fermitin family member 3	108101	0.0316652	0.474888	Upregulated
Lsp1	lymphocyte specific 1	16985	0.0130695	0.472695	Upregulated
Amy1	amylase 1, salivary	11722	0.0370376	0.471975	Upregulated
Tpd52	tumor protein D52	21985	0.00179893	0.47025	Upregulated
Xrcc1	X-ray repair complementing defective repair in Chinese hamster cells 1	22594	0.0408889	0.469536	Upregulated
Cpne8	copine VIII	66871	0.0370208	0.469362	Upregulated
Slc44a3	solute carrier family 44, member 3	213603	0.0315235	0.46858	Upregulated
Htatip2	HIV-1 Tat interactive protein 2	53415	0.00927409	0.468569	Upregulated
S100a11	S100 calcium binding protein A11	20195	0.0141619	0.467359	Upregulated
Dennd2d	DENN/MADD domain containing 2D	72121	0.0214366	0.466499	Upregulated
Tdrkh	tudor and KH domain containing protein	72634	0.00980973	0.465116	Upregulated
Fn3k	fructosamine 3 kinase	63828	0.045345	0.464493	Upregulated
Rap2a	RAS related protein 2a	76108	0.040152	0.464231	Upregulated
Agpat2	1-acylglycerol-3-phosphate O-acyltransferase 2 (lysophosphatidic acid acyltransferase, beta)	67512	0.037046	0.463979	Upregulated
Itga4	integrin alpha 4	16401	0.0190182	0.462808	Upregulated
Il13ra1	interleukin 13 receptor, alpha 1	16164	0.0127359	0.461712	Upregulated
Cyb5r3	cytochrome b5 reductase 3	109754	0.0223168	0.461177	Upregulated
Myh9	myosin, heavy polypeptide 9, non-muscle	17886	0.0116801	0.460817	Upregulated
Ano10	anoctamin 10	102566	0.0403819	0.460353	Upregulated
Rras	related RAS viral (r-ras) oncogene	20130	0.00982193	0.456748	Upregulated
Sccpdh	saccharopine dehydrogenase (putative)	109232	0.0255393	0.454612	Upregulated
Sorbs1	sorbin and SH3 domain containing 1	20411	0.0428005	0.454273	Upregulated
Stxbp2	syntaxin binding protein 2	20911	0.0250091	0.453878	Upregulated
Spg21	SPG21, maspardin	27965	0.0156258	0.449973	Upregulated
Abca8a	ATP-binding cassette, sub-family A (ABC1), member 8a	217258	0.00856069	0.448385	Upregulated
Mvk	mevalonate kinase	17855	0.0382166	0.443986	Upregulated
Tdrd7	tudor domain containing 7	100121	0.0125775	0.443941	Upregulated
Sema3f	sema domain, immunoglobulin domain (Ig), short basic domain, secreted, (semaphorin) 3F	20350	0.0317986	0.44103	Upregulated
Cep70	centrosomal protein 70	68121	0.0121772	0.440295	Upregulated
Vwa5a	von Willebrand factor A domain containing 5A	67776	0.0262506	0.439498	Upregulated
Anxa4	annexin A4	11746	0.00899842	0.437705	Upregulated
Rab3d	RAB3D, member RAS oncogene family	19340	0.0251418	0.436535	Upregulated
Kdm3a	lysine (K)-specific demethylase 3A	104263	0.0482669	0.433773	Upregulated
Flot1	flotillin 1	14251	0.0111172	0.433123	Upregulated
Cnn2	calponin 2	12798	0.00251512	0.432791	Upregulated
Mettl8	methyltransferase like 8	228019	0.0232472	0.431089	Upregulated
Ccser2	coiled-coil serine rich 2	72972	0.0080012	0.430986	Upregulated
Dclre1c	DNA cross-link repair 1C	227525	0.0127314	0.430795	Upregulated
Nmi	N-myc (and STAT) interactor	64685	0.0323353	0.430519	Upregulated
Radil	Ras association and DIL domains	231858	0.0250616	0.429014	Upregulated
Ugdh	UDP-glucose dehydrogenase	22235	0.0490369	0.422974	Upregulated
Sirt5	sirtuin 5	68346	0.0153784	0.422363	Upregulated
Elp6	elongator acetyltransferase complex subunit 6	72341	0.0106701	0.4222	Upregulated
Emp1	epithelial membrane protein 1	13730	0.0321173	0.421382	Upregulated
Fam111a	family with sequence similarity 111, member A	107373	0.0441717	0.418632	Upregulated
Ffar4	free fatty acid receptor 4	107221	0.0190093	0.418051	Upregulated
Smarcb1	SWI/SNF related, matrix associated, actin dependent regulator of chromatin, subfamily b, member 1	20587	0.0499642	0.417545	Upregulated
Tubb5	tubulin, beta 5 class I	22154	0.0150192	0.416299	Upregulated
Rnf5	ring finger protein 5	54197	0.00619473	0.411533	Upregulated
Syne3	spectrin repeat containing, nuclear envelope family member 3	212073	0.0445179	0.406987	Upregulated
Zfp251	zinc finger protein 251	71591	0.0235785	-0.406687	Downregulated
2810004N23Rik	RIKEN cDNA 2810004N23 gene	66523	0.0466946	-0.4068	Downregulated
Ces1d	carboxylesterase 1D	104158	0.0473447	-0.40748	Downregulated
Fam160b1	family with sequence similarity 160, member B1	226252	0.0109825	-0.407513	Downregulated
Psmd9	proteasome (prosome, macropain) 26S subunit, non-ATPase, 9	67151	0.013559	-0.407947	Downregulated
2810013P06Rik	RIKEN cDNA 2810013P06 gene	100503178	0.0157131	-0.408554	Downregulated
Nova1	NOVA alternative splicing regulator 1	664883	0.036825	-0.408617	Downregulated
Stim2	stromal interaction molecule 2	116873	0.0275128	-0.408745	Downregulated
Prdx6	peroxiredoxin 6	11758	0.0303535	-0.408965	Downregulated
Rab34	RAB34, member RAS oncogene family	19376	0.0127364	-0.409311	Downregulated
Mtg2	mitochondrial ribosome associated GTPase 2	52856	0.0170563	-0.411522	Downregulated
Adam12	a disintegrin and metallopeptidase domain 12 (meltrin alpha)	11489	0.00983608	-0.411935	Downregulated
Zfp839	zinc finger protein 839	72805	0.0368354	-0.411955	Downregulated
Scarb2	scavenger receptor class B, member 2	12492	0.0202671	-0.411995	Downregulated
Taf1d	TATA-box binding protein associated factor, RNA polymerase I, D	75316	0.0288479	-0.412452	Downregulated
Ankra2	ankyrin repeat, family A (RFXANK-like), 2	68558	0.0238126	-0.412962	Downregulated
Lysmd4	LysM, putative peptidoglycan-binding, domain containing 4	75099	0.0291758	-0.414504	Downregulated
L3hypdh	L-3-hydroxyproline dehydratase (trans-)	67217	0.0225588	-0.414568	Downregulated
Mfap3	microfibrillar-associated protein 3	216760	0.0300008	-0.415793	Downregulated
Cecr2	CECR2, histone acetyl-lysine reader	330409	0.0126015	-0.416454	Downregulated
Arhgef26	Rho guanine nucleotide exchange factor (GEF) 26	622434	0.0221749	-0.417447	Downregulated
Cdc37l1	cell division cycle 37-like 1	67072	0.0118068	-0.417861	Downregulated
Tulp3	tubby-like protein 3	22158	0.0344392	-0.417888	Downregulated
Myzap	myocardial zonula adherens protein	102371	0.047784	-0.42103	Downregulated
Fem1a	fem 1 homolog a	14154	0.0352829	-0.42168	Downregulated
Rbm14	RNA binding motif protein 14	56275	0.0439284	-0.422248	Downregulated
Eogt	EGF domain-specific O-linked N-acetylglucosamine (GlcNAc) transferase	101351	0.0119697	-0.422659	Downregulated
Top1	topoisomerase (DNA) I	21969	0.0380169	-0.423277	Downregulated
Ctsf	cathepsin F	56464	0.0354729	-0.423737	Downregulated
Gk	glycerol kinase	14933	0.00629107	-0.424871	Downregulated
Ptar1	protein prenyltransferase alpha subunit repeat containing 1	72351	0.0111413	-0.42597	Downregulated
Arel1	apoptosis resistant E3 ubiquitin protein ligase 1	68497	0.023928	-0.426322	Downregulated
Tmem267	transmembrane protein 267	633640	0.0391557	-0.426381	Downregulated
Mxd4	Max dimerization protein 4	17122	0.0133168	-0.427312	Downregulated
Tmed5	transmembrane p24 trafficking protein 5	73130	0.00581431	-0.428312	Downregulated
Pptc7	PTC7 protein phosphatase homolog	320717	0.0378605	-0.428805	Downregulated
Ccdc88a	coiled coil domain containing 88A	108686	0.0246323	-0.429333	Downregulated
Tasor2	transcription activation suppressor family member 2	105203	0.0256855	-0.429751	Downregulated
Zfp568	zinc finger protein 568	243905	0.026386	-0.430369	Downregulated
Zfp106	zinc finger protein 106	20402	0.014068	-0.430533	Downregulated
Nasp	nuclear autoantigenic sperm protein (histone-binding)	50927	0.0322024	-0.431075	Downregulated
Med26	mediator complex subunit 26	70625	0.0398555	-0.432089	Downregulated
Szrd1	SUZ RNA binding domain containing 1	213491	0.028879	-0.432424	Downregulated
Slc25a47	solute carrier family 25, member 47	104910	0.042275	-0.432482	Downregulated
Skil	SKI-like	20482	0.0181412	-0.433428	Downregulated
Ptprd	protein tyrosine phosphatase, receptor type, D	19266	0.0464638	-0.433451	Downregulated
Miip	migration and invasion inhibitory protein	28010	0.0201884	-0.433831	Downregulated
Btbd3	BTB (POZ) domain containing 3	228662	0.0154736	-0.434492	Downregulated
Smpd1	sphingomyelin phosphodiesterase 1, acid lysosomal	20597	0.028855	-0.43499	Downregulated
Frmd6	FERM domain containing 6	319710	0.0176199	-0.435448	Downregulated
Cdkal1	CDK5 regulatory subunit associated protein 1-like 1	68916	0.0277671	-0.435619	Downregulated
Chfr	checkpoint with forkhead and ring finger domains	231600	0.0491363	-0.436569	Downregulated
Fam135a	family with sequence similarity 135, member A	68187	0.0300264	-0.436643	Downregulated
Gpr160	G protein-coupled receptor 160	71862	0.0101285	-0.437041	Downregulated
Rgmb	repulsive guidance molecule family member B	68799	0.0111332	-0.438913	Downregulated
Akap17b	A kinase (PRKA) anchor protein 17B	338351	0.0120471	-0.440114	Downregulated
Pdcd11	programmed cell death 11	18572	0.0222349	-0.442725	Downregulated
Krt79	keratin 79	223917	0.0187151	-0.444749	Downregulated
Tbc1d20	TBC1 domain family, member 20	67231	0.00799383	-0.445971	Downregulated
Nsun5	NOL1/NOP2/Sun domain family, member 5	100609	0.0432538	-0.445988	Downregulated
Ablim3	actin binding LIM protein family, member 3	319713	0.00740357	-0.446356	Downregulated
Larp4	La ribonucleoprotein domain family, member 4	207214	0.0219595	-0.447593	Downregulated
Phc3	polyhomeotic 3	241915	0.0198265	-0.447844	Downregulated
Gpat3	glycerol-3-phosphate acyltransferase 3	231510	0.0459371	-0.448785	Downregulated
Slc33a1	solute carrier family 33 (acetyl-CoA transporter), member 1	11416	0.00797285	-0.449548	Downregulated
Rbm4b	RNA binding motif protein 4B	66704	0.028801	-0.44961	Downregulated
Dvl2	dishevelled segment polarity protein 2	13543	0.0242026	-0.450334	Downregulated
Rom1	rod outer segment membrane protein 1	19881	0.0035311	-0.45139	Downregulated
Agfg2	ArfGAP with FG repeats 2	231801	0.0160791	-0.452749	Downregulated
Brf1	BRF1, RNA polymerase III transcription initiation factor 90 kDa subunit	72308	0.0319527	-0.453822	Downregulated
Ppp1r1a	protein phosphatase 1, regulatory inhibitor subunit 1A	58200	0.0350517	-0.45385	Downregulated
Cyrib	CYFIP related Rac1 interactor B	223601	0.0198117	-0.453904	Downregulated
Etv6	ets variant 6	14011	0.0157903	-0.454844	Downregulated
Hnrnpll	heterogeneous nuclear ribonucleoprotein L-like	72692	0.0142086	-0.457574	Downregulated
Tro	trophinin	56191	0.00758789	-0.457722	Downregulated
Med14	mediator complex subunit 14	26896	0.0214269	-0.458102	Downregulated
Polr3h	polymerase (RNA) III (DNA directed) polypeptide H	78929	0.0373771	-0.458614	Downregulated
Pknox1	Pbx/knotted 1 homeobox	18771	0.0379409	-0.458673	Downregulated
Septin4	septin 4	18952	0.0483339	-0.459111	Downregulated
Traf3ip1	TRAF3 interacting protein 1	74019	0.0458911	-0.459311	Downregulated
Fbxl18	F-box and leucine-rich repeat protein 18	231863	0.0114072	-0.460335	Downregulated
Atxn1l	ataxin 1-like	52335	0.0266476	-0.460852	Downregulated
Slc36a2	solute carrier family 36 (proton/amino acid symporter), member 2	246049	0.00881628	-0.461035	Downregulated
Slc22a23	solute carrier family 22, member 23	73102	0.0343403	-0.461654	Downregulated
Cux1	cut-like homeobox 1	13047	0.00877126	-0.462353	Downregulated
Otub2	OTU domain, ubiquitin aldehyde binding 2	68149	0.03114	-0.462434	Downregulated
Rorc	RAR-related orphan receptor gamma	19885	0.0286845	-0.463642	Downregulated
Zbed3	zinc finger, BED type containing 3	72114	0.0346033	-0.464245	Downregulated
Cntrl	centriolin	26920	0.0204978	-0.464659	Downregulated
Atp5l	ATP synthase, H+ transporting, mitochondrial F0 complex, subunit G	27425	0.0367802	-0.464991	Downregulated
Bmp6	bone morphogenetic protein 6	12161	0.0178269	-0.46507	Downregulated
Pxmp2	peroxisomal membrane protein 2	19301	0.0283332	-0.465344	Downregulated
Mocs1	molybdenum cofactor synthesis 1	56738	0.0114308	-0.465665	Downregulated
Simc1	SUMO-interacting motifs containing 1	319719	0.00708251	-0.466226	Downregulated
C330007P06Rik	RIKEN cDNA C330007P06 gene	77644	0.0186852	-0.46786	Downregulated
Lrrc8d	leucine rich repeat containing 8D	231549	0.0291469	-0.468737	Downregulated
Dido1	death inducer-obliterator 1	23856	0.0311653	-0.468749	Downregulated
Spry1	sprouty RTK signaling antagonist 1	24063	0.0463432	-0.472115	Downregulated
Dnajc27	DnaJ heat shock protein family (Hsp40) member C27	217378	0.0203485	-0.472182	Downregulated
Cep126	centrosomal protein 126	234915	0.0230131	-0.472442	Downregulated
Ankrd16	ankyrin repeat domain 16	320816	0.00516066	-0.47309	Downregulated
Ctcflos	CCCTC-binding factor (zinc finger protein)-like, opposite strand	74161	0.0187983	-0.474268	Downregulated
Dbt	dihydrolipoamide branched chain transacylase E2	13171	0.0251676	-0.476055	Downregulated
Klhl18	kelch-like 18	270201	0.0471963	-0.476304	Downregulated
Lrp1	low density lipoprotein receptor-related protein 1	16971	0.0477657	-0.476584	Downregulated
Megf9	multiple EGF-like-domains 9	230316	0.01623	-0.477441	Downregulated
Gpatch2	G patch domain containing 2	67769	0.0400872	-0.4778	Downregulated
Shld2	shieldin complex subunit 2	75698	0.00629955	-0.478905	Downregulated
Bpnt2	3'(2'), 5'-bisphosphate nucleotidase 2	242291	0.00758585	-0.479478	Downregulated
Ctsz	cathepsin Z	64138	0.00700898	-0.481099	Downregulated
Nprl3	nitrogen permease regulator-like 3	17168	0.0107225	-0.48169	Downregulated
Ramp2	receptor (calcitonin) activity modifying protein 2	54409	0.00938658	-0.481805	Downregulated
Dnajc25	DnaJ heat shock protein family (Hsp40) member C25	72429	0.00339877	-0.482839	Downregulated
Grb10	growth factor receptor bound protein 10	14783	0.00302485	-0.483503	Downregulated
Pla2g12a	phospholipase A2, group XIIA	66350	0.0190526	-0.483961	Downregulated
Cbx6	chromobox 6	494448	0.0153635	-0.484683	Downregulated
Rgs3	regulator of G-protein signaling 3	50780	0.0122797	-0.485343	Downregulated
Lipg	lipase, endothelial	16891	0.0458045	-0.485438	Downregulated
Tef	thyrotroph embryonic factor	21685	0.0423416	-0.485764	Downregulated
Zfp275	zinc finger protein 275	27081	0.0236567	-0.48594	Downregulated
Sesn1	sestrin 1	140742	0.0309841	-0.486176	Downregulated
Slc15a4	solute carrier family 15, member 4	100561	0.0365348	-0.486459	Downregulated
Cep85l	centrosomal protein 85-like	100038725	0.0215868	-0.48695	Downregulated
BC025920	zinc finger protein pseudogene	268319	0.0103755	-0.489384	Downregulated
Chrna2	cholinergic receptor, nicotinic, alpha polypeptide 2 (neuronal)	110902	0.0486547	-0.490608	Downregulated
Daam2	dishevelled associated activator of morphogenesis 2	76441	0.0276781	-0.493179	Downregulated
Sult1a1	sulfotransferase family 1A, phenol-preferring, member 1	20887	0.0144674	-0.494446	Downregulated
Atg9a	autophagy related 9A	245860	0.0487911	-0.496451	Downregulated
Spen	spen family transcription repressor	56381	0.0420967	-0.496666	Downregulated
Zfp646	zinc finger protein 646	233905	0.0483275	-0.496689	Downregulated
Ube4a	ubiquitination factor E4A	140630	0.00988316	-0.496966	Downregulated
Ttc33	tetratricopeptide repeat domain 33	67515	0.0305448	-0.4987	Downregulated
Zmiz1	zinc finger, MIZ-type containing 1	328365	0.0411327	-0.498734	Downregulated
Ss18l1	SS18, nBAF chromatin remodeling complex subunit like 1	269397	0.0313251	-0.499431	Downregulated
Pxk	PX domain containing serine/threonine kinase	218699	0.00881586	-0.499549	Downregulated
Agap2	ArfGAP with GTPase domain, ankyrin repeat and PH domain 2	216439	0.0399815	-0.500337	Downregulated
Arhgap32	Rho GTPase activating protein 32	330914	0.0434154	-0.503182	Downregulated
Zhx3	zinc fingers and homeoboxes 3	320799	0.0109001	-0.503384	Downregulated
Pdp2	pyruvate dehyrogenase phosphatase catalytic subunit 2	382051	0.043949	-0.505173	Downregulated
Lnx1	ligand of numb-protein X 1	16924	0.0127321	-0.505381	Downregulated
Zmat3	zinc finger matrin type 3	22401	0.0471416	-0.506531	Downregulated
Meis1	Meis homeobox 1	17268	0.00323839	-0.507787	Downregulated
Frrs1	ferric-chelate reductase 1	20321	0.00706782	-0.508318	Downregulated
Kank3	KN motif and ankyrin repeat domains 3	80880	0.0109855	-0.508528	Downregulated
Zfp93	zinc finger protein 93	22755	0.0432529	-0.509545	Downregulated
Slc26a6	solute carrier family 26, member 6	171429	0.00283955	-0.512129	Downregulated
Pde4c	phosphodiesterase 4C, cAMP specific	110385	0.0270199	-0.51298	Downregulated
Trib1	tribbles pseudokinase 1	211770	0.0214788	-0.51388	Downregulated
Slc25a17	solute carrier family 25 (mitochondrial carrier, peroxisomal membrane protein), member 17	20524	0.042094	-0.513901	Downregulated
Rasd1	RAS, dexamethasone-induced 1	19416	0.0297419	-0.514289	Downregulated
Sh3rf1	SH3 domain containing ring finger 1	59009	0.0100156	-0.515265	Downregulated
Plekhf1	pleckstrin homology domain containing, family F (with FYVE domain) member 1	72287	0.00721164	-0.515407	Downregulated
Ankzf1	ankyrin repeat and zinc finger domain containing 1	52231	0.0272207	-0.51576	Downregulated
Lncbate10	brown adipose tissue enriched long noncoding RNA 10	442846	0.0221328	-0.515874	Downregulated
Dhrsx	dehydrogenase/reductase (SDR family) X chromosome	236082	0.0286606	-0.51621	Downregulated
Zfp503	zinc finger protein 503	218820	0.0108652	-0.517047	Downregulated
Map4k2	mitogen-activated protein kinase kinase kinase kinase 2	26412	0.0407732	-0.517438	Downregulated
Lrrc58	leucine rich repeat containing 58	320184	0.0191994	-0.51816	Downregulated
Mpzl3	myelin protein zero-like 3	319742	0.0238186	-0.520101	Downregulated
Usp31	ubiquitin specific peptidase 31	76179	0.0474829	-0.520754	Downregulated
Taf7	TATA-box binding protein associated factor 7	24074	0.00413693	-0.521582	Downregulated
Mindy3	MINDY lysine 48 deubiquitinase 3	66960	0.00228395	-0.521812	Downregulated
Wdr77	WD repeat domain 77	70465	0.0295926	-0.522366	Downregulated
B3galnt2	UDP-GalNAc:betaGlcNAc beta 1,3-galactosaminyltransferase, polypeptide 2	97884	0.0465681	-0.524295	Downregulated
Chrnb2	cholinergic receptor, nicotinic, beta polypeptide 2 (neuronal)	11444	0.0414467	-0.524489	Downregulated
Fv1	Friend virus susceptibility 1	14349	0.00587292	-0.524872	Downregulated
Orm3	orosomucoid 3	18407	0.0445137	-0.526214	Downregulated
Mpp6	membrane protein, palmitoylated 6 (MAGUK p55 subfamily member 6)	56524	0.00453045	-0.526414	Downregulated
Mob1b	MOB kinase activator 1B	68473	0.00473665	-0.526677	Downregulated
Abhd2	abhydrolase domain containing 2	54608	0.002867	-0.526964	Downregulated
Prex2	phosphatidylinositol-3,4,5-trisphosphate-dependent Rac exchange factor 2	109294	0.0109281	-0.527724	Downregulated
Tpst2	protein-tyrosine sulfotransferase 2	22022	0.00360336	-0.528578	Downregulated
Mier3	MIER family member 3	218613	0.0303112	-0.529413	Downregulated
Hacd2	3-hydroxyacyl-CoA dehydratase 2	70757	0.0161774	-0.529866	Downregulated
Zfp944	zinc finger protein 944	319615	0.00945306	-0.532041	Downregulated
Lpl	lipoprotein lipase	16956	0.00879566	-0.534563	Downregulated
Ptpn13	protein tyrosine phosphatase, non-receptor type 13	19249	0.00148168	-0.535444	Downregulated
Arrdc2	arrestin domain containing 2	70807	0.0208516	-0.536695	Downregulated
Hic2	hypermethylated in cancer 2	58180	0.0452392	-0.537141	Downregulated
Epb41	erythrocyte membrane protein band 4.1	269587	0.00621582	-0.537666	Downregulated
Slc25a42	solute carrier family 25, member 42	73095	0.0154903	-0.538437	Downregulated
Mthfr	methylenetetrahydrofolate reductase	17769	0.0362331	-0.539679	Downregulated
Mylk	myosin, light polypeptide kinase	107589	0.0156604	-0.539721	Downregulated
Noct	nocturnin	12457	0.0309936	-0.540955	Downregulated
Sgk1	serum/glucocorticoid regulated kinase 1	20393	0.0178344	-0.541859	Downregulated
Mcf2l	mcf.2 transforming sequence-like	17207	0.0158085	-0.542824	Downregulated
Lin52	lin-52 homolog (C. elegans)	217708	0.010923	-0.543113	Downregulated
9930104L06Rik	RIKEN cDNA 9930104L06 gene	194268	0.00877947	-0.546292	Downregulated
Them4	thioesterase superfamily member 4	75778	0.0388413	-0.548172	Downregulated
Prickle1	prickle planar cell polarity protein 1	106042	0.00057716	-0.549002	Downregulated
Zfp74	zinc finger protein 74	72723	0.0472967	-0.549534	Downregulated
Wdr91	WD repeat domain 91	101240	0.0135715	-0.550474	Downregulated
Inf2	inverted formin, FH2 and WH2 domain containing	70435	0.0127692	-0.551323	Downregulated
Klf9	Kruppel-like factor 9	16601	0.0394031	-0.552141	Downregulated
Ftsj3	FtsJ RNA methyltransferase homolog 3 (E. coli)	56095	0.0235283	-0.552616	Downregulated
Apmap	adipocyte plasma membrane associated protein	71881	0.00769466	-0.553563	Downregulated
Fbxo28	F-box protein 28	67948	0.000630662	-0.554158	Downregulated
Hspa14	heat shock protein 14	50497	0.0179563	-0.554332	Downregulated
Ankrd10	ankyrin repeat domain 10	102334	0.0457102	-0.5547	Downregulated
Zw10	zw10 kinetochore protein	26951	0.00275888	-0.554959	Downregulated
Heg1	heart development protein with EGF-like domains 1	77446	0.00289168	-0.555107	Downregulated
Pon1	paraoxonase 1	18979	0.0479298	-0.555116	Downregulated
Ajuba	ajuba LIM protein	16475	0.0109743	-0.55693	Downregulated
Acss3	acyl-CoA synthetase short-chain family member 3	380660	0.0426056	-0.558351	Downregulated
Il15ra	interleukin 15 receptor, alpha chain	16169	0.000808876	-0.559577	Downregulated
D230025D16Rik	RIKEN cDNA D230025D16 gene	234678	0.00380067	-0.560503	Downregulated
Zdhhc13	zinc finger, DHHC domain containing 13	243983	0.0189786	-0.560702	Downregulated
Slc25a34	solute carrier family 25, member 34	384071	0.0413654	-0.562749	Downregulated
Fgfr2	fibroblast growth factor receptor 2	14183	0.00964292	-0.565909	Downregulated
Per2	period circadian clock 2	18627	0.0204073	-0.567923	Downregulated
Cibar1	CBY1 interacting BAR domain containing 1	68099	0.00498611	-0.567977	Downregulated
Ranbp9	RAN binding protein 9	56705	0.0320165	-0.568045	Downregulated
Mtmr4	myotubularin related protein 4	170749	0.0056533	-0.573567	Downregulated
Vhl	von Hippel-Lindau tumor suppressor	22346	0.0278143	-0.573664	Downregulated
Cd200	CD200 antigen	17470	0.0467808	-0.576111	Downregulated
Lpin3	lipin 3	64899	0.0204969	-0.578366	Downregulated
Csrnp2	cysteine-serine-rich nuclear protein 2	207785	0.0320151	-0.580041	Downregulated
Pde10a	phosphodiesterase 10A	23984	0.0058561	-0.580368	Downregulated
Dedd2	death effector domain-containing DNA binding protein 2	67379	0.00763805	-0.580752	Downregulated
Usp53	ubiquitin specific peptidase 53	99526	0.000788219	-0.581096	Downregulated
Zbtb40	zinc finger and BTB domain containing 40	230848	0.0253487	-0.581363	Downregulated
Bhlhb9	basic helix-loop-helix domain containing, class B9	70237	0.0237326	-0.583471	Downregulated
Tmem87b	transmembrane protein 87B	72477	0.00780429	-0.584627	Downregulated
Lrig3	leucine-rich repeats and immunoglobulin-like domains 3	320398	0.0244261	-0.58835	Downregulated
2010003K11Rik	RIKEN cDNA 2010003K11 gene	69861	0.0295696	-0.589864	Downregulated
P3h1	prolyl 3-hydroxylase 1	56401	0.0288858	-0.590429	Downregulated
Tbcel	tubulin folding cofactor E-like	272589	0.00598804	-0.593145	Downregulated
Hspa4l	heat shock protein 4 like	18415	0.025831	-0.594009	Downregulated
Lifr	LIF receptor alpha	16880	0.0351735	-0.594204	Downregulated
Pcdh17	protocadherin 17	219228	0.0141102	-0.594698	Downregulated
Tgfbr3	transforming growth factor, beta receptor III	21814	0.0117726	-0.59491	Downregulated
Smim13	small integral membrane protein 13	108934	0.00124791	-0.595895	Downregulated
Sfxn2	sideroflexin 2	94279	0.00910303	-0.596548	Downregulated
Fgd4	FYVE, RhoGEF and PH domain containing 4	224014	0.00804885	-0.59663	Downregulated
Chml	choroideremia-like	12663	0.0258752	-0.597569	Downregulated
Bcl2l1	BCL2-like 1	12048	0.00961834	-0.59876	Downregulated
Tmtc1	transmembrane and tetratricopeptide repeat containing 1	387314	0.0147102	-0.60172	Downregulated
Trp53bp2	transformation related protein 53 binding protein 2	209456	0.0251519	-0.602454	Downregulated
Hsd17b7	hydroxysteroid (17-beta) dehydrogenase 7	15490	0.013293	-0.604908	Downregulated
Pld1	phospholipase D1	18805	0.0174663	-0.605906	Downregulated
Dnajc18	DnaJ heat shock protein family (Hsp40) member C18	76594	0.0141808	-0.608658	Downregulated
Chd1	chromodomain helicase DNA binding protein 1	12648	0.0147461	-0.609317	Downregulated
Pdzd8	PDZ domain containing 8	107368	0.00105892	-0.611435	Downregulated
Abcc10	ATP-binding cassette, sub-family C (CFTR/MRP), member 10	224814	0.00793099	-0.612917	Downregulated
Dpy19l1	dpy-19-like 1 (C. elegans)	244745	0.00223427	-0.613902	Downregulated
2810025M15Rik	RIKEN cDNA 2810025M15 gene	69953	0.0258485	-0.614612	Downregulated
Lurap1	leucine rich adaptor protein 1	68075	0.0101342	-0.616581	Downregulated
Il6ra	interleukin 6 receptor, alpha	16194	0.0107317	-0.616668	Downregulated
B230354K17Rik	RIKEN cDNA B230354K17 gene	105246278	0.0354738	-0.618217	Downregulated
Prag1	PEAK1 related kinase activating pseudokinase 1	244418	0.022045	-0.618788	Downregulated
Zfhx4	zinc finger homeodomain 4	80892	0.00416368	-0.620839	Downregulated
Polr1a	polymerase (RNA) I polypeptide A	20019	0.0204431	-0.622788	Downregulated
Capn10	calpain 10	23830	0.020037	-0.623399	Downregulated
Mir22hg	Mir22 host gene (non-protein coding)	100042498	0.00250515	-0.624264	Downregulated
Got1	glutamic-oxaloacetic transaminase 1, soluble	14718	0.01746	-0.625193	Downregulated
Tceal9	transcription elongation factor A like 9	22381	0.0037219	-0.627455	Downregulated
Bbs1	Bardet-Biedl syndrome 1 (human)	52028	0.00942219	-0.627867	Downregulated
Snx33	sorting nexin 33	235406	0.0262955	-0.628204	Downregulated
Nt5dc3	5'-nucleotidase domain containing 3	103466	0.0124511	-0.628632	Downregulated
Gm826	predicted gene 826	329554	0.0299596	-0.63175	Downregulated
Fkbp5	FK506 binding protein 5	14229	0.04036	-0.634977	Downregulated
Fam160a1	family with sequence similarity 160, member A1	229488	0.000762157	-0.634998	Downregulated
Sun1	Sad1 and UNC84 domain containing 1	77053	0.00626246	-0.635122	Downregulated
Acot6	acyl-CoA thioesterase 6	217700	0.000673818	-0.638031	Downregulated
Rsrp1	arginine/serine rich protein 1	27981	0.0418525	-0.639317	Downregulated
Zfhx3	zinc finger homeobox 3	11906	0.0152991	-0.640322	Downregulated
Dhtkd1	dehydrogenase E1 and transketolase domain containing 1	209692	0.00490509	-0.642172	Downregulated
Zbtb20	zinc finger and BTB domain containing 20	56490	0.00211416	-0.642472	Downregulated
Amigo1	adhesion molecule with Ig like domain 1	229715	0.0379333	-0.645259	Downregulated
Cbfb	core binding factor beta	12400	0.00313163	-0.646829	Downregulated
Grhl1	grainyhead like transcription factor 1	195733	0.0153244	-0.64748	Downregulated
D16Ertd472e	DNA segment, Chr 16, ERATO Doi 472, expressed	67102	0.0107564	-0.648194	Downregulated
Dio2	deiodinase, iodothyronine, type II	13371	0.000403389	-0.649091	Downregulated
Car4	carbonic anhydrase 4	12351	0.0255612	-0.649128	Downregulated
B4galt5	UDP-Gal:betaGlcNAc beta 1,4-galactosyltransferase, polypeptide 5	56336	0.0132732	-0.64949	Downregulated
Ccdc138	coiled-coil domain containing 138	76138	0.00146888	-0.650341	Downregulated
Igsf8	immunoglobulin superfamily, member 8	140559	0.00473606	-0.65148	Downregulated
Rhbdd2	rhomboid domain containing 2	215160	0.00355296	-0.651671	Downregulated
4632404H12Rik	RIKEN cDNA 4632404H12 gene	74034	0.00875274	-0.654704	Downregulated
Nol4l	nucleolar protein 4-like	329540	0.0164954	-0.654725	Downregulated
Etfbkmt	electron transfer flavoprotein beta subunit lysine methyltransferase	320204	0.0215597	-0.659576	Downregulated
Tiam2	T cell lymphoma invasion and metastasis 2	24001	0.00987415	-0.665027	Downregulated
Myd88	myeloid differentiation primary response gene 88	17874	0.00815597	-0.665043	Downregulated
Eid2b	EP300 interacting inhibitor of differentiation 2B	434156	0.0086959	-0.668748	Downregulated
Ppl	periplakin	19041	0.00831214	-0.672066	Downregulated
Adcy3	adenylate cyclase 3	104111	0.00795914	-0.672682	Downregulated
Acss1	acyl-CoA synthetase short-chain family member 1	68738	0.00312332	-0.680956	Downregulated
Sacm1l	SAC1 suppressor of actin mutations 1-like (yeast)	83493	0.000893629	-0.681814	Downregulated
Fbxo32	F-box protein 32	67731	0.0243749	-0.683527	Downregulated
Slc7a6	solute carrier family 7 (cationic amino acid transporter, y+ system), member 6	330836	0.00352516	-0.684875	Downregulated
Fzd7	frizzled class receptor 7	14369	0.0066096	-0.687025	Downregulated
Slc35e1	solute carrier family 35, member E1	270066	0.0018181	-0.687243	Downregulated
Gm9899	predicted gene 9899	100502829	0.0164737	-0.689231	Downregulated
Adtrp	androgen dependent TFPI regulating protein	109254	0.011294	-0.689576	Downregulated
Tmem41a	transmembrane protein 41a	66664	0.00556551	-0.690421	Downregulated
Foxn3	forkhead box N3	71375	0.00169117	-0.69227	Downregulated
Sephs2	selenophosphate synthetase 2	20768	0.00126331	-0.696829	Downregulated
Zmym6	zinc finger, MYM-type 6	100177	0.00771968	-0.69715	Downregulated
Dyrk2	dual-specificity tyrosine-(Y)-phosphorylation regulated kinase 2	69181	0.00326814	-0.698943	Downregulated
Gpr135	G protein-coupled receptor 135	238252	0.000653046	-0.701776	Downregulated
Helb	helicase (DNA) B	117599	0.00126267	-0.702652	Downregulated
Zfp142	zinc finger protein 142	77264	0.0143871	-0.706344	Downregulated
Pfkfb3	6-phosphofructo-2-kinase/fructose-2,6-biphosphatase 3	170768	0.0419629	-0.711829	Downregulated
Syde2	synapse defective 1, Rho GTPase, homolog 2 (C. elegans)	214804	0.00470597	-0.713607	Downregulated
Rcl1	RNA terminal phosphate cyclase-like 1	59028	0.000961387	-0.715426	Downregulated
Celsr3	cadherin, EGF LAG seven-pass G-type receptor 3	107934	0.00502675	-0.718756	Downregulated
Net1	neuroepithelial cell transforming gene 1	56349	0.0265508	-0.721487	Downregulated
Inmt	indolethylamine N-methyltransferase	21743	0.0154504	-0.721873	Downregulated
Rasal2	RAS protein activator like 2	226525	0.00332658	-0.726054	Downregulated
Tnfrsf1a	tumor necrosis factor receptor superfamily, member 1a	21937	0.00293943	-0.726288	Downregulated
Synm	synemin, intermediate filament protein	233335	0.00179362	-0.728122	Downregulated
Cblb	Casitas B-lineage lymphoma b	208650	0.0279936	-0.733408	Downregulated
Trim67	tripartite motif-containing 67	330863	0.00904819	-0.737723	Downregulated
Perm1	PPARGC1 and ESRR induced regulator, muscle 1	74183	0.0057154	-0.739405	Downregulated
Atl2	atlastin GTPase 2	56298	0.00460932	-0.747641	Downregulated
Errfi1	ERBB receptor feedback inhibitor 1	74155	0.0378912	-0.748323	Downregulated
Cth	cystathionase (cystathionine gamma-lyase)	107869	0.00561527	-0.748782	Downregulated
Osgin2	oxidative stress induced growth inhibitor family member 2	209212	0.0328802	-0.752628	Downregulated
Syt12	synaptotagmin XII	171180	0.00833029	-0.755069	Downregulated
Dclre1b	DNA cross-link repair 1B	140917	0.0239267	-0.75958	Downregulated
Gbp6	guanylate binding protein 6	100702	0.00287527	-0.764052	Downregulated
Lox	lysyl oxidase	16948	0.00668251	-0.76495	Downregulated
Atxn1	ataxin 1	20238	0.0276037	-0.777436	Downregulated
Ppfia2	protein tyrosine phosphatase, receptor type, f polypeptide (PTPRF), interacting protein (liprin), alpha 2	327814	0.00744818	-0.788749	Downregulated
Vwa3a	von Willebrand factor A domain containing 3A	233813	0.0068189	-0.790118	Downregulated
Hipk1	homeodomain interacting protein kinase 1	15257	0.00372942	-0.791689	Downregulated
Usp33	ubiquitin specific peptidase 33	170822	0.000156561	-0.792816	Downregulated
Kalrn	kalirin, RhoGEF kinase	545156	0.000146786	-0.800131	Downregulated
Npr1	natriuretic peptide receptor 1	18160	0.00431493	-0.801004	Downregulated
Zfp36	zinc finger protein 36	22695	0.0285546	-0.808652	Downregulated
Rab3a	RAB3A, member RAS oncogene family	19339	0.00128316	-0.812903	Downregulated
Mylip	myosin regulatory light chain interacting protein	218203	0.00870173	-0.82779	Downregulated
Tsc22d3	TSC22 domain family, member 3	14605	0.030256	-0.834553	Downregulated
Mcc	mutated in colorectal cancers	328949	0.00428638	-0.841213	Downregulated
Klf15	Kruppel-like factor 15	66277	0.0177648	-0.869129	Downregulated
Tacc2	transforming, acidic coiled-coil containing protein 2	57752	0.0198298	-0.869677	Downregulated
Xylt1	xylosyltransferase 1	233781	0.000166623	-0.879162	Downregulated
Ttll7	tubulin tyrosine ligase-like family, member 7	70892	0.00184221	-0.883361	Downregulated
Armcx1	armadillo repeat containing, X-linked 1	78248	0.000725355	-0.886382	Downregulated
Col1a1	collagen, type I, alpha 1	12842	0.015487	-0.911161	Downregulated
Apex2	apurinic/apyrimidinic endonuclease 2	77622	0.000188198	-0.914729	Downregulated
Usp2	ubiquitin specific peptidase 2	53376	0.00277766	-0.926187	Downregulated
Acvr1c	activin A receptor, type IC	269275	0.00100493	-0.932044	Downregulated
Slc40a1	solute carrier family 40 (iron-regulated transporter), member 1	53945	7.34863e-05	-0.947342	Downregulated
Peg3	paternally expressed 3	18616	0.00461359	-0.948875	Downregulated
Inpp1	inositol polyphosphate-1-phosphatase	16329	0.000461492	-0.983309	Downregulated
Mfsd2a	major facilitator superfamily domain containing 2A	76574	0.00500865	-1.00029	Downregulated
Slc12a2	solute carrier family 12, member 2	20496	0.00388777	-1.00438	Downregulated
Ppm1k	protein phosphatase 1K (PP2C domain containing)	243382	0.00527307	-1.01125	Downregulated
Adarb1	adenosine deaminase, RNA-specific, B1	110532	0.000145047	-1.01738	Downregulated
Gramd1b	GRAM domain containing 1B	235283	0.0122716	-1.04854	Downregulated
Myrip	myosin VIIA and Rab interacting protein	245049	0.00234224	-1.05719	Downregulated
Cyp2b10	cytochrome P450, family 2, subfamily b, polypeptide 10	13088	0.0202258	-1.06418	Downregulated
Tead1	TEA domain family member 1	21676	0.00515782	-1.08341	Downregulated
Sgk2	serum/glucocorticoid regulated kinase 2	27219	0.00143558	-1.08701	Downregulated
Spsb1	splA/ryanodine receptor domain and SOCS box containing 1	74646	0.00407531	-1.09026	Downregulated
Osbpl6	oxysterol binding protein-like 6	99031	0.000572288	-1.09077	Downregulated
Asl	argininosuccinate lyase	109900	0.00639219	-1.10465	Downregulated
Slc36a1	solute carrier family 36 (proton/amino acid symporter), member 1	215335	0.0004934	-1.12211	Downregulated
Myo1b	myosin IB	17912	0.00321544	-1.12813	Downregulated
Loxl1	lysyl oxidase-like 1	16949	0.000629461	-1.13133	Downregulated
Tceal8	transcription elongation factor A (SII)-like 8	66684	5.57444e-05	-1.15442	Downregulated
Lgr4	leucine-rich repeat-containing G protein-coupled receptor 4	107515	2.98694e-05	-1.1917	Downregulated
Prodh	proline dehydrogenase	19125	0.0019448	-1.19341	Downregulated
Mir6236	microRNA 6236	102465959	0.0262361	-1.20049	Downregulated
Irak3	interleukin-1 receptor-associated kinase 3	73914	0.00010233	-1.20995	Downregulated
AW011738	expressed sequence AW011738	100382	0.000179586	-1.21629	Downregulated
Ttpa	tocopherol (alpha) transfer protein	50500	0.00241552	-1.2182	Downregulated
Cyp2e1	cytochrome P450, family 2, subfamily e, polypeptide 1	13106	0.00709039	-1.2553	Downregulated
Ankrd33b	ankyrin repeat domain 33B	67434	0.000169377	-1.2608	Downregulated
Ccdc85a	coiled-coil domain containing 85A	216613	0.00127812	-1.29806	Downregulated
Nnmt	nicotinamide N-methyltransferase	18113	0.00605174	-1.30692	Downregulated
Eno3	enolase 3, beta muscle	13808	0.0141795	-1.44352	Downregulated
Trp53inp1	transformation related protein 53 inducible nuclear protein 1	60599	0.00837942	-1.46023	Downregulated
Irf4	interferon regulatory factor 4	16364	0.0257402	-1.49097	Downregulated
Rn18s-rs5	18s RNA, related sequence 5	110183	0.00925745	-1.66662	Downregulated
Socs2	suppressor of cytokine signaling 2	216233	0.000409004	-1.71204	Downregulated
Neb	nebulin	17996	0.0143844	-1.81021	Downregulated
Lars2	leucyl-tRNA synthetase, mitochondrial	102436	0.00676123	-1.9778	Downregulated
Ttn	titin	22138	0.00642542	-2.56537	Downregulated

## Sheet: Young Chronic mild CEvsYoung RT
Gene information			Overall p value	Log2-fold-change	DEG
Symbol	Description	Entrez ID	Young Chronic mild CE / Young RT	Young Chronic mild CE / Young RT	Young Chronic mild CE / Young RT
Hephl1	hephaestin-like 1	244698	1.79922e-05	3.87422	Upregulated
Ttc25	tetratricopeptide repeat domain 25	74407	0.000350866	3.46421	Upregulated
Hcn2	hyperpolarization-activated, cyclic nucleotide-gated K+ 2	15166	9.68087e-05	2.69641	Upregulated
Adcy10	adenylate cyclase 10	271639	0.000251192	2.65662	Upregulated
Mtarc1	mitochondrial amidoxime reducing component 1	66112	7.53545e-05	2.45329	Upregulated
Maff	v-maf musculoaponeurotic fibrosarcoma oncogene family, protein F (avian)	17133	0.000593187	2.43488	Upregulated
Tjp3	tight junction protein 3	27375	0.000498591	2.36121	Upregulated
Sorl1	sortilin-related receptor, LDLR class A repeats-containing	20660	0.000215812	2.12389	Upregulated
Cish	cytokine inducible SH2-containing protein	12700	0.00767091	2.10798	Upregulated
Ak4	adenylate kinase 4	11639	0.000103576	2.0994	Upregulated
Bhlhe40	basic helix-loop-helix family, member e40	20893	0.00017478	2.08419	Upregulated
Atp1a3	ATPase, Na+/K+ transporting, alpha 3 polypeptide	232975	0.000245645	2.03323	Upregulated
Mir6392	microRNA 6392	102466642	0.000935749	1.94382	Upregulated
Tlcd3b	TLC domain containing 3B	68952	0.00308328	1.7978	Upregulated
2010003K11Rik	RIKEN cDNA 2010003K11 gene	69861	0.0011915	1.7861	Upregulated
Npnt	nephronectin	114249	0.00162105	1.76902	Upregulated
Orm3	orosomucoid 3	18407	0.00074049	1.75113	Upregulated
Acsl5	acyl-CoA synthetase long-chain family member 5	433256	0.000921428	1.74294	Upregulated
Isyna1	myo-inositol 1-phosphate synthase A1	71780	0.000935476	1.74045	Upregulated
Ttpa	tocopherol (alpha) transfer protein	50500	0.000153811	1.73581	Upregulated
Tesc	tescalcin	57816	0.00114463	1.71896	Upregulated
Acot11	acyl-CoA thioesterase 11	329910	0.000396843	1.68954	Upregulated
Dixdc1	DIX domain containing 1	330938	0.00323554	1.68035	Upregulated
Mapk8ip1	mitogen-activated protein kinase 8 interacting protein 1	19099	0.000762474	1.66122	Upregulated
Ntsr2	neurotensin receptor 2	18217	0.00109068	1.66061	Upregulated
Dhcr24	24-dehydrocholesterol reductase	74754	0.000686076	1.65277	Upregulated
Mlph	melanophilin	171531	0.000679616	1.64356	Upregulated
Fdps	farnesyl diphosphate synthetase	110196	0.00101289	1.62845	Upregulated
Adap1	ArfGAP with dual PH domains 1	231821	0.00110408	1.6274	Upregulated
Cela1	chymotrypsin-like elastase family, member 1	109901	0.00136294	1.5953	Upregulated
E2f2	E2F transcription factor 2	242705	0.000850065	1.58108	Upregulated
Slc25a34	solute carrier family 25, member 34	384071	0.0170781	1.56788	Upregulated
Npas2	neuronal PAS domain protein 2	18143	0.00602738	1.54313	Upregulated
Aspg	asparaginase	104816	0.0011045	1.52381	Upregulated
Alpl	alkaline phosphatase, liver/bone/kidney	11647	0.00500985	1.52216	Upregulated
Gadd45b	growth arrest and DNA-damage-inducible 45 beta	17873	0.0254231	1.51984	Upregulated
Sc5d	sterol-C5-desaturase	235293	0.0032773	1.51808	Upregulated
Bsg	basigin	12215	0.000438088	1.50911	Upregulated
Grb7	growth factor receptor bound protein 7	14786	0.00113907	1.50072	Upregulated
Pfkl	phosphofructokinase, liver, B-type	18641	0.000941222	1.48983	Upregulated
Mvd	mevalonate (diphospho) decarboxylase	192156	0.00159895	1.48838	Upregulated
Impa2	inositol monophosphatase 2	114663	0.000236825	1.4799	Upregulated
Ryr2	ryanodine receptor 2, cardiac	20191	0.0109333	1.47622	Upregulated
Ckb	creatine kinase, brain	12709	0.00645705	1.47486	Upregulated
Cyp1a1	cytochrome P450, family 1, subfamily a, polypeptide 1	13076	0.00268654	1.4739	Upregulated
Sbk1	SH3-binding kinase 1	104175	0.00182297	1.45598	Upregulated
Rundc3a	RUN domain containing 3A	51799	0.00208811	1.41793	Upregulated
Slc35g1	solute carrier family 35, member G1	240660	0.00354207	1.41202	Upregulated
Oxtr	oxytocin receptor	18430	0.00291256	1.39302	Upregulated
Kcng4	potassium voltage-gated channel, subfamily G, member 4	66733	0.00490841	1.38672	Upregulated
Atf5	activating transcription factor 5	107503	0.000580316	1.38175	Upregulated
Slc2a5	solute carrier family 2 (facilitated glucose transporter), member 5	56485	0.0122392	1.37617	Upregulated
Me1	malic enzyme 1, NADP(+)-dependent, cytosolic	17436	0.00682092	1.37578	Upregulated
Lfng	LFNG O-fucosylpeptide 3-beta-N-acetylglucosaminyltransferase	16848	0.0104074	1.37379	Upregulated
Sqle	squalene epoxidase	20775	0.00332047	1.37332	Upregulated
Hk1	hexokinase 1	15275	0.00160046	1.37046	Upregulated
Tlcd2	TLC domain containing 2	380712	0.00125484	1.36834	Upregulated
Arhgef37	Rho guanine nucleotide exchange factor (GEF) 37	328967	0.00108889	1.36143	Upregulated
Cyp51	cytochrome P450, family 51	13121	0.00273454	1.3375	Upregulated
Mid1ip1	Mid1 interacting protein 1 (gastrulation specific G12-like (zebrafish))	68041	0.00329524	1.33525	Upregulated
Sema4a	sema domain, immunoglobulin domain (Ig), transmembrane domain (TM) and short cytoplasmic domain, (semaphorin) 4A	20351	0.00412456	1.33517	Upregulated
Reep6	receptor accessory protein 6	70335	0.00375252	1.33506	Upregulated
Arntl	aryl hydrocarbon receptor nuclear translocator-like	11865	0.0098778	1.32747	Upregulated
Bmyc	brain expressed myelocytomatosis oncogene	107771	0.0034774	1.31417	Upregulated
Acly	ATP citrate lyase	104112	0.0118625	1.31119	Upregulated
Fasn	fatty acid synthase	14104	0.0234872	1.29624	Upregulated
Ldlr	low density lipoprotein receptor	16835	0.00159288	1.29154	Upregulated
Ppp1r3b	protein phosphatase 1, regulatory subunit 3B	244416	0.0045594	1.28166	Upregulated
Nipsnap1	nipsnap homolog 1	18082	0.000502207	1.28071	Upregulated
Ephx1	epoxide hydrolase 1, microsomal	13849	0.00339057	1.27012	Upregulated
Comt	catechol-O-methyltransferase	12846	0.00126691	1.26884	Upregulated
Ctsz	cathepsin Z	64138	0.00880776	1.26167	Upregulated
Sycp3	synaptonemal complex protein 3	20962	0.0177599	1.25952	Upregulated
Ncan	neurocan	13004	0.00283216	1.25371	Upregulated
Ccl2	chemokine (C-C motif) ligand 2	20296	0.0148671	1.2393	Upregulated
Hsph1	heat shock 105kDa/110kDa protein 1	15505	0.0252437	1.23671	Upregulated
Rpia	ribose 5-phosphate isomerase A	19895	0.000485672	1.23179	Upregulated
Ccdc162	coiled-coil domain containing 162	75973	0.005563	1.23143	Upregulated
Ccdc122	coiled-coil domain containing 122	108811	0.00252157	1.23081	Upregulated
Prkab1	protein kinase, AMP-activated, beta 1 non-catalytic subunit	19079	0.0014167	1.23079	Upregulated
Alox12	arachidonate 12-lipoxygenase	11684	0.000873689	1.21807	Upregulated
Hdac11	histone deacetylase 11	232232	0.0129666	1.215	Upregulated
Dtx4	deltex 4, E3 ubiquitin ligase	207521	0.00222657	1.20591	Upregulated
Fbp2	fructose bisphosphatase 2	14120	0.00196272	1.20198	Upregulated
Cables1	CDK5 and Abl enzyme substrate 1	63955	0.0124087	1.2003	Upregulated
Bc1	brain cytoplasmic RNA 1	100568459	0.0322074	1.19661	Upregulated
Rap1gap	Rap1 GTPase-activating protein	110351	0.00156256	1.19346	Upregulated
Orai2	ORAI calcium release-activated calcium modulator 2	269717	0.0088059	1.18455	Upregulated
Nabp1	nucleic acid binding protein 1	109019	0.00504079	1.18369	Upregulated
Gpi1	glucose-6-phosphate isomerase 1	14751	0.0018043	1.17945	Upregulated
Elovl6	ELOVL family member 6, elongation of long chain fatty acids (yeast)	170439	0.00907583	1.17509	Upregulated
Rnd2	Rho family GTPase 2	11858	0.000776474	1.17209	Upregulated
Megf6	multiple EGF-like-domains 6	230971	0.0181897	1.1686	Upregulated
Osgin1	oxidative stress induced growth inhibitor 1	71839	0.00718584	1.15209	Upregulated
Pgd	phosphogluconate dehydrogenase	110208	0.00526009	1.15101	Upregulated
Adcy3	adenylate cyclase 3	104111	0.0245045	1.14865	Upregulated
Lss	lanosterol synthase	16987	0.00415206	1.13354	Upregulated
Apln	apelin	30878	0.042972	1.1305	Upregulated
Hspb8	heat shock protein 8	80888	0.00461843	1.12939	Upregulated
Orm1	orosomucoid 1	18405	0.0104194	1.11843	Upregulated
Fah	fumarylacetoacetate hydrolase	14085	0.00639759	1.11828	Upregulated
Aacs	acetoacetyl-CoA synthetase	78894	0.011765	1.11371	Upregulated
Ripor2	RHO family interacting cell polarization regulator 2	193385	0.000337471	1.11319	Upregulated
Ric3	RIC3 acetylcholine receptor chaperone	320360	0.00129251	1.11222	Upregulated
Egln3	egl-9 family hypoxia-inducible factor 3	112407	0.00792239	1.10893	Upregulated
Foxred2	FAD-dependent oxidoreductase domain containing 2	239554	0.00225047	1.10694	Upregulated
Plin2	perilipin 2	11520	0.000694187	1.10391	Upregulated
Spns1	spinster homolog 1	73658	0.00254371	1.09707	Upregulated
P4ha1	procollagen-proline, 2-oxoglutarate 4-dioxygenase (proline 4-hydroxylase), alpha 1 polypeptide	18451	0.0271324	1.09619	Upregulated
Tm6sf1	transmembrane 6 superfamily member 1	107769	0.00495808	1.0925	Upregulated
P2rx6	purinergic receptor P2X, ligand-gated ion channel, 6	18440	0.00400605	1.09027	Upregulated
Nsdhl	NAD(P) dependent steroid dehydrogenase-like	18194	0.00568473	1.08533	Upregulated
Tmie	transmembrane inner ear	20776	0.014467	1.08364	Upregulated
Dtl	denticleless E3 ubiquitin protein ligase	76843	0.00167597	1.08283	Upregulated
1700037H04Rik	RIKEN cDNA 1700037H04 gene	67326	0.000403538	1.08097	Upregulated
Dhx32	DEAH (Asp-Glu-Ala-His) box polypeptide 32	101437	0.00331216	1.07865	Upregulated
Bsn	bassoon	12217	0.0216103	1.07542	Upregulated
Rims4	regulating synaptic membrane exocytosis 4	241770	0.00963844	1.07458	Upregulated
Rassf3	Ras association (RalGDS/AF-6) domain family member 3	192678	0.0058186	1.07316	Upregulated
Prlr	prolactin receptor	19116	0.0144185	1.07233	Upregulated
Pfkp	phosphofructokinase, platelet	56421	0.00517964	1.07191	Upregulated
Hacd2	3-hydroxyacyl-CoA dehydratase 2	70757	0.00373784	1.07167	Upregulated
Kit	KIT proto-oncogene receptor tyrosine kinase	16590	0.0153555	1.07146	Upregulated
Pmvk	phosphomevalonate kinase	68603	0.0115357	1.07065	Upregulated
Cenpf	centromere protein F	108000	0.00264808	1.07059	Upregulated
AU041133	expressed sequence AU041133	216177	0.00721659	1.06836	Upregulated
Dhrs7	dehydrogenase/reductase (SDR family) member 7	66375	0.00376409	1.0665	Upregulated
Prune2	prune homolog 2	353211	0.0181341	1.06432	Upregulated
Fgl1	fibrinogen-like protein 1	234199	0.00559055	1.06274	Upregulated
Gm20300	predicted gene, 20300	100504586	0.00515912	1.04992	Upregulated
Pafah2	platelet-activating factor acetylhydrolase 2	100163	0.00944327	1.04612	Upregulated
Mbnl3	muscleblind like splicing factor 3	171170	0.00877555	1.03594	Upregulated
Spire1	spire type actin nucleation factor 1	68166	0.00483181	1.03147	Upregulated
Elovl5	ELOVL family member 5, elongation of long chain fatty acids (yeast)	68801	0.00723264	1.02959	Upregulated
Ptch2	patched 2	19207	0.0193805	1.02869	Upregulated
Chst12	carbohydrate sulfotransferase 12	59031	0.00683831	1.02815	Upregulated
1700088E04Rik	RIKEN cDNA 1700088E04 gene	27660	0.0266674	1.02788	Upregulated
Lyplal1	lysophospholipase-like 1	226791	0.00752941	1.02538	Upregulated
Rassf2	Ras association (RalGDS/AF-6) domain family member 2	215653	0.00809296	1.02417	Upregulated
Pth1r	parathyroid hormone 1 receptor	19228	0.00918071	1.01473	Upregulated
Mogat1	monoacylglycerol O-acyltransferase 1	68393	0.00014685	1.01372	Upregulated
Eno1	enolase 1, alpha non-neuron	13806	0.00967343	1.0122	Upregulated
Deptor	DEP domain containing MTOR-interacting protein	97998	0.0140022	1.01137	Upregulated
Stmn2	stathmin-like 2	20257	0.0296875	1.00982	Upregulated
Tent5a	terminal nucleotidyltransferase 5A	212943	0.0128138	1.00515	Upregulated
Cdca7l	cell division cycle associated 7 like	217946	0.0135545	1.00445	Upregulated
Hey1	hairy/enhancer-of-split related with YRPW motif 1	15213	0.0234822	1.00214	Upregulated
Hspa4l	heat shock protein 4 like	18415	0.0302687	0.997406	Upregulated
Slc38a10	solute carrier family 38, member 10	72055	0.00451034	0.996853	Upregulated
Ttc7	tetratricopeptide repeat domain 7	225049	0.000835089	0.996387	Upregulated
Papln	papilin, proteoglycan-like sulfated glycoprotein	170721	0.00373143	0.989678	Upregulated
Slc25a32	solute carrier family 25, member 32	69906	0.0153776	0.989538	Upregulated
Hk2	hexokinase 2	15277	0.000556735	0.98601	Upregulated
Ppp1r3c	protein phosphatase 1, regulatory subunit 3C	53412	0.0112196	0.981923	Upregulated
Manf	mesencephalic astrocyte-derived neurotrophic factor	74840	0.00447639	0.974063	Upregulated
Tsc22d1	TSC22 domain family, member 1	21807	0.00115293	0.972237	Upregulated
Hsd17b7	hydroxysteroid (17-beta) dehydrogenase 7	15490	0.00283119	0.969593	Upregulated
Scd2	stearoyl-Coenzyme A desaturase 2	20250	0.0446947	0.968195	Upregulated
Rhod	ras homolog family member D	11854	0.00846653	0.967243	Upregulated
H4c9	H4 clustered histone 9	319158	0.013177	0.963439	Upregulated
Tuba1c	tubulin, alpha 1C	22146	0.00535692	0.962946	Upregulated
Adamtsl5	ADAMTS-like 5	66548	0.00279541	0.961302	Upregulated
Psph	phosphoserine phosphatase	100678	0.0101189	0.956718	Upregulated
Thg1l	tRNA-histidine guanylyltransferase 1-like (S. cerevisiae)	66628	0.00233418	0.953651	Upregulated
Cars2	cysteinyl-tRNA synthetase 2 (mitochondrial)(putative)	71941	0.00702279	0.950992	Upregulated
G6pdx	glucose-6-phosphate dehydrogenase X-linked	14381	0.00344001	0.950633	Upregulated
Zfp982	zinc finger protein 982	195531	0.0186908	0.948888	Upregulated
Slc26a10	solute carrier family 26, member 10	216441	0.0149882	0.947993	Upregulated
Zfp873	zinc finger protein 873	408062	0.015817	0.945851	Upregulated
Lsm11	U7 snRNP-specific Sm-like protein LSM11	72290	0.00933078	0.945602	Upregulated
Ttl	tubulin tyrosine ligase	69737	0.0034902	0.945084	Upregulated
Ptges	prostaglandin E synthase	64292	0.00643771	0.944992	Upregulated
Gmfg	glia maturation factor, gamma	63986	0.0253803	0.944554	Upregulated
C130074G19Rik	RIKEN cDNA C130074G19 gene	226777	0.0136874	0.941702	Upregulated
Glul	glutamate-ammonia ligase (glutamine synthetase)	14645	0.0092428	0.937368	Upregulated
Slc25a1	solute carrier family 25 (mitochondrial carrier, citrate transporter), member 1	13358	0.0213686	0.936134	Upregulated
Hoga1	4-hydroxy-2-oxoglutarate aldolase 1	67432	0.00241278	0.935971	Upregulated
Hebp2	heme binding protein 2	56016	0.00732789	0.935956	Upregulated
Nudt4	nudix (nucleoside diphosphate linked moiety X)-type motif 4	71207	0.0432362	0.93585	Upregulated
Egln1	egl-9 family hypoxia-inducible factor 1	112405	0.00494955	0.935715	Upregulated
Shroom1	shroom family member 1	71774	0.0152316	0.93393	Upregulated
Cry1	cryptochrome 1 (photolyase-like)	12952	0.0103713	0.93315	Upregulated
Letm1	leucine zipper-EF-hand containing transmembrane protein 1	56384	0.00814312	0.932695	Upregulated
Agpat2	1-acylglycerol-3-phosphate O-acyltransferase 2 (lysophosphatidic acid acyltransferase, beta)	67512	0.00149652	0.932651	Upregulated
H2bc3	H2B clustered histone 3	319178	0.00535272	0.932631	Upregulated
Spaca1	sperm acrosome associated 1	67652	0.0342748	0.931182	Upregulated
Gpd1	glycerol-3-phosphate dehydrogenase 1 (soluble)	14555	0.0248808	0.929704	Upregulated
Unc5a	unc-5 netrin receptor A	107448	0.00717057	0.924696	Upregulated
Pkm	pyruvate kinase, muscle	18746	0.00617212	0.918281	Upregulated
Garnl3	GTPase activating RANGAP domain-like 3	99326	0.00759222	0.917053	Upregulated
Fabp5	fatty acid binding protein 5, epidermal	16592	0.00909946	0.916632	Upregulated
Atg9b	autophagy related 9B	213948	0.00886033	0.915333	Upregulated
Ctnna1	catenin (cadherin associated protein), alpha 1	12385	0.00482481	0.91236	Upregulated
Pclo	piccolo (presynaptic cytomatrix protein)	26875	0.00495439	0.907967	Upregulated
Zadh2	zinc binding alcohol dehydrogenase, domain containing 2	225791	0.0286025	0.905582	Upregulated
Rom1	rod outer segment membrane protein 1	19881	0.00607122	0.905289	Upregulated
Rps6ka1	ribosomal protein S6 kinase polypeptide 1	20111	0.00708573	0.904618	Upregulated
Ccnd1	cyclin D1	12443	0.0171295	0.904315	Upregulated
Zfp938	zinc finger protein 938	237411	0.0150573	0.903952	Upregulated
Stard4	StAR-related lipid transfer (START) domain containing 4	170459	0.0244384	0.903046	Upregulated
Vash1	vasohibin 1	238328	0.00843099	0.896874	Upregulated
Paqr9	progestin and adipoQ receptor family member IX	75552	0.00173399	0.894489	Upregulated
Galk1	galactokinase 1	14635	0.0137126	0.89213	Upregulated
Angptl8	angiopoietin-like 8	624219	0.010858	0.889329	Upregulated
BC028528	cDNA sequence BC028528	229600	0.00390463	0.889052	Upregulated
Mfsd4b1	major facilitator superfamily domain containing 4B1	215929	0.0221644	0.887501	Upregulated
Ephb2	Eph receptor B2	13844	0.0178028	0.885859	Upregulated
Id2	inhibitor of DNA binding 2	15902	0.0115449	0.885483	Upregulated
Pcyt2	phosphate cytidylyltransferase 2, ethanolamine	68671	0.00192446	0.885016	Upregulated
Tubb6	tubulin, beta 6 class V	67951	0.00930594	0.882149	Upregulated
Abhd8	abhydrolase domain containing 8	64296	0.00277717	0.881623	Upregulated
Ccdc91	coiled-coil domain containing 91	67015	0.00114913	0.879263	Upregulated
Tnfrsf22	tumor necrosis factor receptor superfamily, member 22	79202	0.0189672	0.877847	Upregulated
Als2cl	ALS2 C-terminal like	235633	0.0112919	0.875832	Upregulated
Mttp	microsomal triglyceride transfer protein	17777	0.0202641	0.873566	Upregulated
Tle6	transducin-like enhancer of split 6	114606	0.022033	0.872359	Upregulated
Msmo1	methylsterol monoxygenase 1	66234	0.0272713	0.870725	Upregulated
Sdf2l1	stromal cell-derived factor 2-like 1	64136	0.0110557	0.870288	Upregulated
Lrfn3	leucine rich repeat and fibronectin type III domain containing 3	233067	0.0209089	0.869708	Upregulated
Dhcr7	7-dehydrocholesterol reductase	13360	0.0114322	0.868418	Upregulated
Sh3bgrl2	SH3 domain binding glutamic acid-rich protein like 2	212531	0.00362641	0.868354	Upregulated
Myrip	myosin VIIA and Rab interacting protein	245049	0.0123572	0.867891	Upregulated
Ect2	ect2 oncogene	13605	0.0243864	0.858117	Upregulated
Fbxo44	F-box protein 44	230903	0.00145788	0.855227	Upregulated
Myo5a	myosin VA	17918	0.00141803	0.855125	Upregulated
Hmox1	heme oxygenase 1	15368	0.0345719	0.854981	Upregulated
Dnajb1	DnaJ heat shock protein family (Hsp40) member B1	81489	0.017169	0.854079	Upregulated
H4c2	H4 clustered histone 2	326620	0.031133	0.853809	Upregulated
Zfp799	zinc finger protein 799	240064	0.0116994	0.849811	Upregulated
H1f5	H1.5 linker histone, cluster member	56702	0.0187319	0.84649	Upregulated
Dnajc22	DnaJ heat shock protein family (Hsp40) member C22	72778	0.0215536	0.841509	Upregulated
Thrsp	thyroid hormone responsive	21835	0.0269164	0.833966	Upregulated
Map3k19	mitogen-activated protein kinase kinase kinase 19	22625	0.027749	0.833644	Upregulated
Pgap6	post-glycosylphosphatidylinositol attachment to proteins 6	60455	0.0143584	0.833166	Upregulated
Sh3bp4	SH3-domain binding protein 4	98402	0.0178073	0.83186	Upregulated
Kbtbd11	kelch repeat and BTB (POZ) domain containing 11	74901	0.0181609	0.831009	Upregulated
Cox19	cytochrome c oxidase assembly protein 19	68033	0.00102669	0.830871	Upregulated
Tmx4	thioredoxin-related transmembrane protein 4	52837	0.00645404	0.829865	Upregulated
Septin5	septin 5	18951	0.0306403	0.828187	Upregulated
Camk2b	calcium/calmodulin-dependent protein kinase II, beta	12323	0.0250295	0.827925	Upregulated
Chordc1	cysteine and histidine-rich domain (CHORD)-containing, zinc-binding protein 1	66917	0.0407653	0.827263	Upregulated
Mif	macrophage migration inhibitory factor (glycosylation-inhibiting factor)	17319	0.0115002	0.826807	Upregulated
Acacb	acetyl-Coenzyme A carboxylase beta	100705	0.00274472	0.825369	Upregulated
Chsy1	chondroitin sulfate synthase 1	269941	0.00888085	0.824175	Upregulated
Pla2g7	phospholipase A2, group VII (platelet-activating factor acetylhydrolase, plasma)	27226	0.0279582	0.823444	Upregulated
Nradd	neurotrophin receptor associated death domain	67169	0.0391808	0.819107	Upregulated
Srxn1	sulfiredoxin 1 homolog (S. cerevisiae)	76650	0.00449216	0.816393	Upregulated
Dnaja4	DnaJ heat shock protein family (Hsp40) member A4	58233	0.0178747	0.815802	Upregulated
4933431E20Rik	RIKEN cDNA 4933431E20 gene	329735	0.0094896	0.815619	Upregulated
Mthfd2	methylenetetrahydrofolate dehydrogenase (NAD+ dependent), methenyltetrahydrofolate cyclohydrolase	17768	0.00679195	0.814397	Upregulated
Lipo3	lipase, member O3	381236	0.0252999	0.812922	Upregulated
C1rl	complement component 1, r subcomponent-like	232371	0.0120007	0.810912	Upregulated
I830077J02Rik	RIKEN cDNA I830077J02 gene	433638	0.0318846	0.810671	Upregulated
Fn3k	fructosamine 3 kinase	63828	0.00282194	0.810609	Upregulated
Tfdp1	transcription factor Dp 1	21781	0.0164842	0.809409	Upregulated
Vps37d	vacuolar protein sorting 37D	194309	0.00505327	0.808303	Upregulated
6430571L13Rik	RIKEN cDNA 6430571L13 gene	235599	0.0317425	0.808008	Upregulated
Rmdn3	regulator of microtubule dynamics 3	67809	0.00319998	0.807837	Upregulated
Banp	BTG3 associated nuclear protein	53325	0.02539	0.807683	Upregulated
Edn1	endothelin 1	13614	0.00972523	0.80475	Upregulated
Aurka	aurora kinase A	20878	0.0165399	0.802408	Upregulated
Mpc1	mitochondrial pyruvate carrier 1	55951	0.033058	0.801127	Upregulated
A430035B10Rik	RIKEN cDNA A430035B10 gene	320312	0.0124136	0.79798	Upregulated
Aldoa	aldolase A, fructose-bisphosphate	11674	0.0130056	0.79794	Upregulated
Fmo2	flavin containing monooxygenase 2	55990	0.0112616	0.794736	Upregulated
Praf2	PRA1 domain family 2	54637	0.0321151	0.78984	Upregulated
Tmem79	transmembrane protein 79	71913	0.00985221	0.788938	Upregulated
Cpm	carboxypeptidase M	70574	0.0343862	0.787921	Upregulated
Espn	espin	56226	0.00417099	0.787556	Upregulated
Tspan15	tetraspanin 15	70423	0.00667906	0.785978	Upregulated
Uqcc2	ubiquinol-cytochrome c reductase complex assembly factor 2	67267	0.0124124	0.785915	Upregulated
Mark1	MAP/microtubule affinity regulating kinase 1	226778	0.00522402	0.785574	Upregulated
Pir	pirin	69656	0.00835893	0.785208	Upregulated
Dhx58	DEXH (Asp-Glu-X-His) box polypeptide 58	80861	0.010093	0.784676	Upregulated
Gcat	glycine C-acetyltransferase (2-amino-3-ketobutyrate-coenzyme A ligase)	26912	0.0266995	0.783311	Upregulated
Itgae	integrin alpha E, epithelial-associated	16407	0.0107397	0.782989	Upregulated
Golga7b	golgi autoantigen, golgin subfamily a, 7B	71146	0.0235589	0.781573	Upregulated
Syt12	synaptotagmin XII	171180	0.0177769	0.781458	Upregulated
Emcn	endomucin	59308	0.00361806	0.781123	Upregulated
Ampd3	adenosine monophosphate deaminase 3	11717	0.0210767	0.779772	Upregulated
Gm36445	zinc finger protein 120-like	115488122	0.0187566	0.779102	Upregulated
Cnst	consortin, connexin sorting protein	226744	0.00130975	0.778506	Upregulated
Tstd3	thiosulfate sulfurtransferase (rhodanese)-like domain containing 3	77032	0.0198782	0.77473	Upregulated
Ddt	D-dopachrome tautomerase	13202	0.0310973	0.773965	Upregulated
Hopx	HOP homeobox	74318	0.03829	0.773833	Upregulated
Usp10	ubiquitin specific peptidase 10	22224	0.0189054	0.770508	Upregulated
Ubiad1	UbiA prenyltransferase domain containing 1	71707	0.0171067	0.770473	Upregulated
Slc25a10	solute carrier family 25 (mitochondrial carrier, dicarboxylate transporter), member 10	27376	0.0204908	0.76892	Upregulated
Acss3	acyl-CoA synthetase short-chain family member 3	380660	0.0109306	0.76868	Upregulated
Hgf	hepatocyte growth factor	15234	0.0315091	0.768252	Upregulated
Higd1a	HIG1 domain family, member 1A	56295	0.0295106	0.767386	Upregulated
Eif1a	eukaryotic translation initiation factor 1A	13664	0.0242365	0.766877	Upregulated
Ccdc138	coiled-coil domain containing 138	76138	0.00566353	0.766562	Upregulated
Mical2	microtubule associated monooxygenase, calponin and LIM domain containing 2	320878	0.00874983	0.765976	Upregulated
Bmi1	Bmi1 polycomb ring finger oncogene	12151	0.0195707	0.764948	Upregulated
Furin	furin (paired basic amino acid cleaving enzyme)	18550	0.0225589	0.76455	Upregulated
Mki67	antigen identified by monoclonal antibody Ki 67	17345	0.020577	0.76453	Upregulated
Tmem268	transmembrane protein 268	230279	0.000564391	0.764501	Upregulated
Pgam1	phosphoglycerate mutase 1	18648	0.0197274	0.762885	Upregulated
Ndufaf4	NADH:ubiquinone oxidoreductase complex assembly factor 4	68493	0.0340551	0.760546	Upregulated
H2-K2	histocompatibility 2, K region locus 2	630499	0.0452558	0.760031	Upregulated
Hba-a1	hemoglobin alpha, adult chain 1	15122	0.030496	0.758822	Upregulated
Glis3	GLIS family zinc finger 3	226075	0.00799233	0.75352	Upregulated
Acaca	acetyl-Coenzyme A carboxylase alpha	107476	0.043711	0.752875	Upregulated
Mgat3	mannoside acetylglucosaminyltransferase 3	17309	0.0241256	0.751159	Upregulated
Mgll	monoglyceride lipase	23945	0.0245458	0.750669	Upregulated
Cdkn2b	cyclin dependent kinase inhibitor 2B	12579	0.0166402	0.750484	Upregulated
Osbpl6	oxysterol binding protein-like 6	99031	0.0113672	0.749148	Upregulated
Sgms2	sphingomyelin synthase 2	74442	0.0245696	0.748744	Upregulated
Tpbgl	trophoblast glycoprotein-like	100503386	0.0138823	0.747925	Upregulated
Ssc4d	scavenger receptor cysteine rich family, 4 domains	109267	0.0494925	0.742797	Upregulated
Rflnb	refilin B	76566	0.004654	0.740059	Upregulated
Pgp	phosphoglycolate phosphatase	67078	0.00143607	0.740029	Upregulated
Kif11	kinesin family member 11	16551	0.015516	0.739969	Upregulated
Adgrg2	adhesion G protein-coupled receptor G2	237175	0.0398504	0.739658	Upregulated
Snx10	sorting nexin 10	71982	0.0381943	0.737532	Upregulated
Fbxl2	F-box and leucine-rich repeat protein 2	72179	0.0111534	0.737529	Upregulated
Mllt1	myeloid/lymphoid or mixed-lineage leukemia; translocated to, 1	64144	0.0100501	0.735527	Upregulated
Tubb2a	tubulin, beta 2A class IIA	22151	0.0160872	0.733746	Upregulated
Timm8b	translocase of inner mitochondrial membrane 8B	30057	0.0173538	0.733357	Upregulated
Derl1	Der1-like domain family, member 1	67819	0.00918348	0.731343	Upregulated
Eva1a	eva-1 homolog A (C. elegans)	232146	0.0213575	0.729989	Upregulated
BC025920	zinc finger protein pseudogene	268319	0.00540648	0.7298	Upregulated
Polr3g	polymerase (RNA) III (DNA directed) polypeptide G	67486	0.0204305	0.729527	Upregulated
Msrb1	methionine sulfoxide reductase B1	27361	0.0191903	0.72942	Upregulated
Zfp189	zinc finger protein 189	230162	0.029973	0.729238	Upregulated
Nhej1	non-homologous end joining factor 1	75570	0.0131453	0.727414	Upregulated
Morc4	microrchidia 4	75746	0.0233967	0.727408	Upregulated
Hemk1	HemK methyltransferase family member 1	69536	0.0112324	0.725457	Upregulated
Atp8a1	ATPase, aminophospholipid transporter (APLT), class I, type 8A, member 1	11980	0.0211491	0.725444	Upregulated
Tkt	transketolase	21881	0.026415	0.724931	Upregulated
Cdkn3	cyclin-dependent kinase inhibitor 3	72391	0.0316994	0.723858	Upregulated
Rexo2	RNA exonuclease 2	104444	0.00443571	0.722317	Upregulated
Insyn1	inhibitory synaptic factor 1	319477	0.0182394	0.722161	Upregulated
Hsd17b12	hydroxysteroid (17-beta) dehydrogenase 12	56348	0.00664771	0.721618	Upregulated
Ldha	lactate dehydrogenase A	16828	0.0153648	0.720679	Upregulated
Otud6b	OTU domain containing 6B	72201	0.0168883	0.7205	Upregulated
Rpp14	ribonuclease P 14 subunit	67053	0.0172716	0.719789	Upregulated
Knstrn	kinetochore-localized astrin/SPAG5 binding	51944	0.00530187	0.71962	Upregulated
Tigar	Trp53 induced glycolysis regulatory phosphatase	319801	0.0109616	0.719226	Upregulated
Pebp1	phosphatidylethanolamine binding protein 1	23980	0.00415158	0.718746	Upregulated
Akr1b8	aldo-keto reductase family 1, member B8	14187	0.0198584	0.718724	Upregulated
Prdm1	PR domain containing 1, with ZNF domain	12142	0.0266332	0.718606	Upregulated
Cyb561	cytochrome b-561	13056	0.032293	0.717253	Upregulated
Taldo1	transaldolase 1	21351	0.0151905	0.716603	Upregulated
Inafm1	InaF motif containing 1	66300	0.015935	0.715817	Upregulated
Vil1	villin 1	22349	0.0431415	0.713953	Upregulated
Litaf	LPS-induced TN factor	56722	0.00345926	0.713934	Upregulated
Mcee	methylmalonyl CoA epimerase	73724	0.00767066	0.713702	Upregulated
Ropn1l	ropporin 1-like	252967	0.00802704	0.71197	Upregulated
Meis3	Meis homeobox 3	17537	0.0223786	0.711755	Upregulated
H4c11	H4 clustered histone 11	319159	0.00858713	0.710875	Upregulated
Map3k9	mitogen-activated protein kinase kinase kinase 9	338372	0.0409959	0.71003	Upregulated
Sorcs2	sortilin-related VPS10 domain containing receptor 2	81840	0.0468272	0.70987	Upregulated
Mrpl47	mitochondrial ribosomal protein L47	74600	0.0179339	0.709579	Upregulated
Sult5a1	sulfotransferase family 5A, member 1	57429	0.0490278	0.708248	Upregulated
Dpp7	dipeptidylpeptidase 7	83768	0.0277393	0.707714	Upregulated
2010001A14Rik	RIKEN cDNA 2010001A14 gene	76516	0.0446395	0.707463	Upregulated
Phlda3	pleckstrin homology like domain, family A, member 3	27280	0.0293326	0.707223	Upregulated
Spns2	spinster homolog 2	216892	0.0380182	0.706266	Upregulated
Dctd	dCMP deaminase	320685	0.0253324	0.702228	Upregulated
Lman1	lectin, mannose-binding, 1	70361	0.00939604	0.702144	Upregulated
Kcnh2	potassium voltage-gated channel, subfamily H (eag-related), member 2	16511	0.0210024	0.700619	Upregulated
Fbxo33	F-box protein 33	70611	0.00307984	0.70012	Upregulated
Ddhd2	DDHD domain containing 2	72108	0.0117685	0.699612	Upregulated
Acsf2	acyl-CoA synthetase family member 2	264895	0.00721097	0.698581	Upregulated
Atp6v0a2	ATPase, H+ transporting, lysosomal V0 subunit A2	21871	0.0397051	0.698055	Upregulated
Cd59a	CD59a antigen	12509	0.0335135	0.697292	Upregulated
Nacc1	nucleus accumbens associated 1, BEN and BTB (POZ) domain containing	66830	0.0366663	0.69553	Upregulated
Plcb2	phospholipase C, beta 2	18796	0.0282848	0.694915	Upregulated
Map3k8	mitogen-activated protein kinase kinase kinase 8	26410	0.0210671	0.69476	Upregulated
Tmem183a	transmembrane protein 183A	57439	0.0180488	0.693185	Upregulated
Ifi30	interferon gamma inducible protein 30	65972	0.0126746	0.691551	Upregulated
Nudt21	nudix (nucleoside diphosphate linked moiety X)-type motif 21	68219	0.024514	0.691072	Upregulated
Traf3	TNF receptor-associated factor 3	22031	0.00749327	0.688309	Upregulated
Cabyr	calcium-binding tyrosine-(Y)-phosphorylation regulated (fibrousheathin 2)	71132	0.0172178	0.688231	Upregulated
Dennd4a	DENN/MADD domain containing 4A	102442	0.0294442	0.687999	Upregulated
Fhdc1	FH2 domain containing 1	229474	0.0404905	0.687796	Upregulated
Slc41a2	solute carrier family 41, member 2	338365	0.0127147	0.685963	Upregulated
Mmab	methylmalonic aciduria (cobalamin deficiency) cblB type homolog (human)	77697	0.0116038	0.683082	Upregulated
Gys2	glycogen synthase 2	232493	0.0447088	0.682592	Upregulated
Abhd3	abhydrolase domain containing 3	106861	0.0188365	0.681685	Upregulated
Nsun3	NOL1/NOP2/Sun domain family member 3	106338	0.0268576	0.679591	Upregulated
Cd180	CD180 antigen	17079	0.0180196	0.679211	Upregulated
Klhl26	kelch-like 26	234378	0.00359765	0.678712	Upregulated
Zdhhc13	zinc finger, DHHC domain containing 13	243983	0.0411812	0.678135	Upregulated
Triobp	TRIO and F-actin binding protein	110253	0.0225233	0.675896	Upregulated
Ttll12	tubulin tyrosine ligase-like family, member 12	223723	0.0490933	0.674502	Upregulated
Ugp2	UDP-glucose pyrophosphorylase 2	216558	0.0382732	0.673387	Upregulated
Trpm4	transient receptor potential cation channel, subfamily M, member 4	68667	0.0144395	0.672779	Upregulated
Gm46430	predicted gene, 46430	108168101	0.0148893	0.669607	Upregulated
Mtor	mechanistic target of rapamycin kinase	56717	0.0225297	0.668712	Upregulated
Wdr25	WD repeat domain 25	212198	0.0461112	0.66864	Upregulated
Pgs1	phosphatidylglycerophosphate synthase 1	74451	0.0229226	0.666026	Upregulated
Pgk1	phosphoglycerate kinase 1	18655	0.0206375	0.664481	Upregulated
Rorc	RAR-related orphan receptor gamma	19885	0.0347422	0.664065	Upregulated
Cxcl12	chemokine (C-X-C motif) ligand 12	20315	0.0149513	0.663569	Upregulated
Pctp	phosphatidylcholine transfer protein	18559	0.0209333	0.663484	Upregulated
6530402F18Rik	RIKEN cDNA 6530402F18 gene	76220	0.0222903	0.661979	Upregulated
Calm1	calmodulin 1	12313	0.0366333	0.661756	Upregulated
Cxcr4	chemokine (C-X-C motif) receptor 4	12767	0.0209463	0.660984	Upregulated
Slc25a39	solute carrier family 25, member 39	68066	0.0178484	0.66031	Upregulated
Shtn1	shootin 1	71653	0.0217474	0.660122	Upregulated
9930012K11Rik	RIKEN cDNA 9930012K11 gene	268759	0.0340459	0.659734	Upregulated
Mrps2	mitochondrial ribosomal protein S2	118451	0.0189621	0.659146	Upregulated
Thbd	thrombomodulin	21824	0.0317083	0.657878	Upregulated
Rhof	ras homolog family member F (in filopodia)	23912	0.0130734	0.657387	Upregulated
Top2a	topoisomerase (DNA) II alpha	21973	0.00842045	0.656788	Upregulated
Rbp7	retinol binding protein 7, cellular	63954	0.0317978	0.656642	Upregulated
Pvt1	Pvt1 oncogene	19296	0.0202647	0.654755	Upregulated
Mpc2	mitochondrial pyruvate carrier 2	70456	0.0300148	0.654594	Upregulated
Mpzl3	myelin protein zero-like 3	319742	0.00786877	0.654123	Upregulated
Haspin	histone H3 associated protein kinase	14841	0.00678502	0.653097	Upregulated
Tm7sf2	transmembrane 7 superfamily member 2	73166	0.0106998	0.652663	Upregulated
Cdk1	cyclin-dependent kinase 1	12534	0.0466993	0.652497	Upregulated
Nectin1	nectin cell adhesion molecule 1	58235	0.0269674	0.651685	Upregulated
Il2rg	interleukin 2 receptor, gamma chain	16186	0.0285679	0.651352	Upregulated
Avpi1	arginine vasopressin-induced 1	69534	0.0204232	0.651346	Upregulated
Ttll1	tubulin tyrosine ligase-like 1	319953	0.031542	0.651163	Upregulated
Rpp40	ribonuclease P 40 subunit	208366	0.0360922	0.650673	Upregulated
Mlx	MAX-like protein X	21428	0.0105203	0.648986	Upregulated
Psmd10	proteasome (prosome, macropain) 26S subunit, non-ATPase, 10	53380	0.0183727	0.646102	Upregulated
Vti1b	vesicle transport through interaction with t-SNAREs 1B	53612	0.0178584	0.645836	Upregulated
Txnrd2	thioredoxin reductase 2	26462	0.0252882	0.644968	Upregulated
Timm22	translocase of inner mitochondrial membrane 22	56322	0.0143456	0.643797	Upregulated
Racgap1	Rac GTPase-activating protein 1	26934	0.0152131	0.641542	Upregulated
4930556M19Rik	RIKEN cDNA 4930556M19 gene	75259	0.025771	0.640188	Upregulated
2810408A11Rik	RIKEN cDNA 2810408A11 gene	70419	0.0195313	0.640042	Upregulated
Pigq	phosphatidylinositol glycan anchor biosynthesis, class Q	14755	0.0448548	0.637492	Upregulated
Grk5	G protein-coupled receptor kinase 5	14773	0.0164791	0.637332	Upregulated
Rilp	Rab interacting lysosomal protein	280408	0.00951818	0.637023	Upregulated
Eif4ebp2	eukaryotic translation initiation factor 4E binding protein 2	13688	0.0365098	0.636975	Upregulated
Pdk3	pyruvate dehydrogenase kinase, isoenzyme 3	236900	0.0310379	0.635878	Upregulated
Got1	glutamic-oxaloacetic transaminase 1, soluble	14718	0.0279092	0.635236	Upregulated
Gclm	glutamate-cysteine ligase, modifier subunit	14630	0.0110108	0.633516	Upregulated
Ccdc125	coiled-coil domain containing 125	76041	0.00635979	0.633122	Upregulated
Rab6b	RAB6B, member RAS oncogene family	270192	0.0179656	0.632136	Upregulated
Mbd3	methyl-CpG binding domain protein 3	17192	0.0279064	0.630258	Upregulated
Lipa	lysosomal acid lipase A	16889	0.0206273	0.630204	Upregulated
Ltc4s	leukotriene C4 synthase	17001	0.0154612	0.629568	Upregulated
Tlcd4	TLC domain containing 4	99887	0.0152172	0.629017	Upregulated
Rps4l	ribosomal protein S4-like	66184	0.037473	0.628422	Upregulated
Ccdc57	coiled-coil domain containing 57	71276	0.0429824	0.626787	Upregulated
Clec14a	C-type lectin domain family 14, member a	66864	0.0181487	0.626062	Upregulated
Nudt19	nudix (nucleoside diphosphate linked moiety X)-type motif 19	110959	0.00577442	0.625618	Upregulated
H2bc4	H2B clustered histone 4	68024	0.0122247	0.625574	Upregulated
Rab40b	Rab40B, member RAS oncogene family	217371	0.0133834	0.625466	Upregulated
Epor	erythropoietin receptor	13857	0.0450125	0.625073	Upregulated
Fam110a	family with sequence similarity 110, member A	73847	0.0377161	0.624241	Upregulated
1700007L15Rik	RIKEN cDNA 1700007L15 gene	100502742	0.0428833	0.624176	Upregulated
Srd5a1	steroid 5 alpha-reductase 1	78925	0.0298308	0.624054	Upregulated
Ndufab1	NADH:ubiquinone oxidoreductase subunit AB1	70316	0.0183205	0.623745	Upregulated
Lrrc20	leucine rich repeat containing 20	216011	0.010611	0.623744	Upregulated
Cep43	centrosomal protein 43	75296	0.00840333	0.621935	Upregulated
Lrrc8b	leucine rich repeat containing 8 family, member B	433926	0.0405803	0.621606	Upregulated
Tmem177	transmembrane protein 177	66343	0.0259179	0.619028	Upregulated
Echdc1	enoyl Coenzyme A hydratase domain containing 1	52665	0.0479321	0.618603	Upregulated
Nudt1	nudix (nucleoside diphosphate linked moiety X)-type motif 1	17766	0.0051867	0.618382	Upregulated
Rita1	RBPJ interacting and tubulin associated 1	100764	0.0144735	0.617655	Upregulated
Wdr61	WD repeat domain 61	66317	0.00435119	0.617469	Upregulated
Ctla2a	cytotoxic T lymphocyte-associated protein 2 alpha	13024	0.0299034	0.61716	Upregulated
Cyb5r3	cytochrome b5 reductase 3	109754	0.0421862	0.615589	Upregulated
Trim65	tripartite motif-containing 65	338364	0.00906409	0.61462	Upregulated
Pold4	polymerase (DNA-directed), delta 4	69745	0.0399967	0.614277	Upregulated
Nme4	NME/NM23 nucleoside diphosphate kinase 4	56520	0.00896393	0.613492	Upregulated
Parva	parvin, alpha	57342	0.00987443	0.612351	Upregulated
Tubb4b	tubulin, beta 4B class IVB	227613	0.0217672	0.612064	Upregulated
Ube2n	ubiquitin-conjugating enzyme E2N	93765	0.020717	0.611244	Upregulated
H1f3	H1.3 linker histone, cluster member	14957	0.0218025	0.610302	Upregulated
Gpatch4	G patch domain containing 4	66614	0.046927	0.609313	Upregulated
Dcaf6	DDB1 and CUL4 associated factor 6	74106	0.0192587	0.608795	Upregulated
Il17rc	interleukin 17 receptor C	171095	0.024872	0.607011	Upregulated
Slc9a3r1	solute carrier family 9 (sodium/hydrogen exchanger), member 3 regulator 1	26941	0.0405501	0.605335	Upregulated
Lgals9	lectin, galactose binding, soluble 9	16859	0.0416249	0.60453	Upregulated
As3mt	arsenite methyltransferase	57344	0.0324895	0.603686	Upregulated
Tmem44	transmembrane protein 44	224090	0.0415555	0.603219	Upregulated
Tnfaip8l1	tumor necrosis factor, alpha-induced protein 8-like 1	66443	0.0456925	0.603207	Upregulated
Myo5b	myosin VB	17919	0.0476575	0.601506	Upregulated
Kmt5a	lysine methyltransferase 5A	67956	0.0214957	0.601372	Upregulated
Cenpe	centromere protein E	229841	0.0303671	0.601321	Upregulated
Pdk1	pyruvate dehydrogenase kinase, isoenzyme 1	228026	0.0464692	0.600135	Upregulated
Mrpl54	mitochondrial ribosomal protein L54	66047	0.00583997	0.599513	Upregulated
Atp5g2	ATP synthase, H+ transporting, mitochondrial F0 complex, subunit C2 (subunit 9)	67942	0.0456478	0.597589	Upregulated
Incenp	inner centromere protein	16319	0.00231931	0.59742	Upregulated
Iqsec2	IQ motif and Sec7 domain 2	245666	0.0222985	0.595444	Upregulated
Msra	methionine sulfoxide reductase A	110265	0.0184924	0.594515	Upregulated
Dbt	dihydrolipoamide branched chain transacylase E2	13171	0.0403107	0.594226	Upregulated
Isg20	interferon-stimulated protein	57444	0.0204443	0.594017	Upregulated
Mxra7	matrix-remodelling associated 7	67622	0.0315924	0.593674	Upregulated
Cenpn	centromere protein N	72155	0.0482264	0.591124	Upregulated
Crispld1	cysteine-rich secretory protein LCCL domain containing 1	83691	0.0418037	0.590773	Upregulated
Cfap298	cilia and flagella associate protien 298	68001	0.0187299	0.588663	Upregulated
Spata17	spermatogenesis associated 17	74717	0.0180559	0.588579	Upregulated
Pip5k1c	phosphatidylinositol-4-phosphate 5-kinase, type 1 gamma	18717	0.0134861	0.587712	Upregulated
Sars2	seryl-aminoacyl-tRNA synthetase 2	71984	0.0330379	0.587511	Upregulated
Cdpf1	cysteine rich, DPF motif domain containing 1	72355	0.0285352	0.584472	Upregulated
2310039H08Rik	RIKEN cDNA 2310039H08 gene	67101	0.0166848	0.583743	Upregulated
Akr1b10	aldo-keto reductase family 1, member B10 (aldose reductase)	67861	0.0269069	0.583387	Upregulated
Nxnl1	nucleoredoxin-like 1	234404	0.0306417	0.583032	Upregulated
Utp23	UTP23 small subunit processome component	78581	0.013691	0.582647	Upregulated
Fuom	fucose mutarotase	69064	0.0202407	0.581668	Upregulated
Ppfibp1	PTPRF interacting protein, binding protein 1 (liprin beta 1)	67533	0.0370186	0.581579	Upregulated
Acsf3	acyl-CoA synthetase family member 3	257633	0.0290585	0.581154	Upregulated
Ston1	stonin 1	77057	0.0257984	0.579617	Upregulated
Sspo	SCO-spondin	243369	0.0474131	0.579414	Upregulated
Zwint	ZW10 interactor	52696	0.0203645	0.578608	Upregulated
Aph1b	aph1 homolog B, gamma secretase subunit	208117	0.0334019	0.57844	Upregulated
Pgap4	post-GPI attachment to proteins GalNAc transferase 4	67063	0.0218361	0.577878	Upregulated
1110032A03Rik	RIKEN cDNA 1110032A03 gene	68721	0.0207559	0.577543	Upregulated
Ggnbp1	gametogenetin binding protein 1	70772	0.0362447	0.576436	Upregulated
Rbks	ribokinase	71336	0.00421266	0.57636	Upregulated
Smarcd1	SWI/SNF related, matrix associated, actin dependent regulator of chromatin, subfamily d, member 1	83797	0.0294221	0.575489	Upregulated
Mrpl46	mitochondrial ribosomal protein L46	67308	0.0160464	0.575336	Upregulated
4931406C07Rik	RIKEN cDNA 4931406C07 gene	70984	0.0337463	0.575062	Upregulated
Sdc1	syndecan 1	20969	0.0104091	-0.575215	Downregulated
Sfpq	splicing factor proline/glutamine rich (polypyrimidine tract binding protein associated)	71514	0.0257927	-0.5753	Downregulated
Zfp783	zinc finger protein 783	232785	0.0193706	-0.576557	Downregulated
Lrch3	leucine-rich repeats and calponin homology (CH) domain containing 3	70144	0.0241449	-0.577774	Downregulated
Tsc22d3	TSC22 domain family, member 3	14605	0.0444723	-0.577836	Downregulated
Sox6	SRY (sex determining region Y)-box 6	20679	0.00898394	-0.578175	Downregulated
Ccdc88c	coiled-coil domain containing 88C	68339	0.0438032	-0.579326	Downregulated
Amy1	amylase 1, salivary	11722	0.038298	-0.582322	Downregulated
Pard3b	par-3 family cell polarity regulator beta	72823	0.0256005	-0.582341	Downregulated
Col6a1	collagen, type VI, alpha 1	12833	0.0385033	-0.58367	Downregulated
Srrm2	serine/arginine repetitive matrix 2	75956	0.0149446	-0.586789	Downregulated
Dmac2l	distal membrane arm assembly complex 2 like	68055	0.0314558	-0.5877	Downregulated
Smoc2	SPARC related modular calcium binding 2	64074	0.0180715	-0.588513	Downregulated
Pspc1	paraspeckle protein 1	66645	0.0192321	-0.589027	Downregulated
Arrb1	arrestin, beta 1	109689	0.0130338	-0.589428	Downregulated
Zfp658	zinc finger protein 658	210104	0.0333024	-0.59183	Downregulated
Camsap3	calmodulin regulated spectrin-associated protein family, member 3	69697	0.036584	-0.592088	Downregulated
Ddx58	DEAD/H box helicase 58	230073	0.0136227	-0.595987	Downregulated
Psme1	proteasome (prosome, macropain) activator subunit 1 (PA28 alpha)	19186	0.0118575	-0.596397	Downregulated
Tgif1	TGFB-induced factor homeobox 1	21815	0.0161632	-0.602908	Downregulated
Cpe	carboxypeptidase E	12876	0.0496057	-0.602918	Downregulated
Acaa2	acetyl-Coenzyme A acyltransferase 2 (mitochondrial 3-oxoacyl-Coenzyme A thiolase)	52538	0.0182375	-0.603323	Downregulated
Sulf2	sulfatase 2	72043	0.0490959	-0.603717	Downregulated
Six4	sine oculis-related homeobox 4	20474	0.0401759	-0.604334	Downregulated
Picalm	phosphatidylinositol binding clathrin assembly protein	233489	0.00793655	-0.604689	Downregulated
Des	desmin	13346	0.0466977	-0.606013	Downregulated
Pnkd	paroxysmal nonkinesiogenic dyskinesia	56695	0.0154789	-0.60643	Downregulated
Lbh	limb-bud and heart	77889	0.0469717	-0.608399	Downregulated
Gpr52	G protein-coupled receptor 52	620246	0.0225698	-0.611412	Downregulated
Pola2	polymerase (DNA directed), alpha 2	18969	0.0366574	-0.611432	Downregulated
Radil	Ras association and DIL domains	231858	0.0272589	-0.611786	Downregulated
Gm10125	predicted gene 10125	791318	0.0376298	-0.611823	Downregulated
Skil	SKI-like	20482	0.0200374	-0.612418	Downregulated
Bcor	BCL6 interacting corepressor	71458	0.0249965	-0.61505	Downregulated
Cav1	caveolin 1, caveolae protein	12389	0.0203784	-0.615467	Downregulated
Gstt2	glutathione S-transferase, theta 2	14872	0.0268988	-0.615535	Downregulated
Isoc2a	isochorismatase domain containing 2a	664994	0.0334375	-0.616327	Downregulated
Arhgef6	Rac/Cdc42 guanine nucleotide exchange factor (GEF) 6	73341	0.00496269	-0.621762	Downregulated
Pde1b	phosphodiesterase 1B, Ca2+-calmodulin dependent	18574	0.033437	-0.622407	Downregulated
Dock9	dedicator of cytokinesis 9	105445	0.0225617	-0.622413	Downregulated
3110001I22Rik	bifunctional apoptosis regulator	67118	0.022042	-0.6241	Downregulated
Heyl	hairy/enhancer-of-split related with YRPW motif-like	56198	0.0121922	-0.624257	Downregulated
Rev3l	REV3 like, DNA directed polymerase zeta catalytic subunit	19714	0.0365411	-0.627999	Downregulated
Gngt2	guanine nucleotide binding protein (G protein), gamma transducing activity polypeptide 2	14710	0.034372	-0.628975	Downregulated
Exoc3l2	exocyst complex component 3-like 2	74463	0.0134204	-0.630139	Downregulated
Prps1	phosphoribosyl pyrophosphate synthetase 1	19139	0.0434733	-0.630742	Downregulated
Bbof1	basal body orientation factor 1	72873	0.0372516	-0.632342	Downregulated
Rpl28	ribosomal protein L28	19943	0.0347697	-0.633413	Downregulated
Ebf2	early B cell factor 2	13592	0.00968458	-0.637986	Downregulated
St6galnac5	ST6 (alpha-N-acetyl-neuraminyl-2,3-beta-galactosyl-1,3)-N-acetylgalactosaminide alpha-2,6-sialyltransferase 5	26938	0.0346728	-0.642241	Downregulated
2410002F23Rik	RIKEN cDNA 2410002F23 gene	668661	0.0181505	-0.642491	Downregulated
Gm16061	40S ribosomal protein S2 pseudogene	102641305	0.0347294	-0.643499	Downregulated
Slc22a4	solute carrier family 22 (organic cation transporter), member 4	30805	0.0240987	-0.644661	Downregulated
Kirrel3	kirre like nephrin family adhesion molecule 3	67703	0.00616481	-0.648315	Downregulated
Jmjd1c	jumonji domain containing 1C	108829	0.00965731	-0.648638	Downregulated
Cdc25a	cell division cycle 25A	12530	0.0343966	-0.649409	Downregulated
Cmbl	carboxymethylenebutenolidase-like (Pseudomonas)	69574	0.0361265	-0.652014	Downregulated
Nim1k	NIM1 serine/threonine protein kinase	245269	0.0240632	-0.652528	Downregulated
9530026P05Rik	RIKEN cDNA 9530026P05 gene	330385	0.0211467	-0.653503	Downregulated
Mideas	mitotic deacetylase associated SANT domain protein	238317	0.0083458	-0.654553	Downregulated
Zfp827	zinc finger protein 827	622675	0.0187655	-0.656354	Downregulated
Nop58	NOP58 ribonucleoprotein	55989	0.00219163	-0.656576	Downregulated
Blcap	bladder cancer associated protein	53619	0.0332422	-0.658804	Downregulated
Scarna13	small Cajal body-specific RNA 1	100306943	0.0468946	-0.660715	Downregulated
Cavin1	caveolae associated 1	19285	0.0273219	-0.661262	Downregulated
Eme2	essential meiotic structure-specific endonuclease subunit 2	193838	0.0262113	-0.662829	Downregulated
Marveld1	MARVEL (membrane-associating) domain containing 1	277010	0.035336	-0.663272	Downregulated
Oat	ornithine aminotransferase	18242	0.0398236	-0.663534	Downregulated
Ezh1	enhancer of zeste 1 polycomb repressive complex 2 subunit	14055	0.0193923	-0.663747	Downregulated
Pacs1	phosphofurin acidic cluster sorting protein 1	107975	0.0270898	-0.663862	Downregulated
Ddhd1	DDHD domain containing 1	114874	0.0309551	-0.664196	Downregulated
Rpl9	ribosomal protein L9	20005	0.00811313	-0.66431	Downregulated
Abi3bp	ABI gene family, member 3 (NESH) binding protein	320712	0.0190889	-0.665149	Downregulated
Tusc3	tumor suppressor candidate 3	80286	0.0102712	-0.665359	Downregulated
Ces1f	carboxylesterase 1F	234564	0.0179649	-0.66672	Downregulated
H2-Q6	histocompatibility 2, Q region locus 6	110557	0.0437798	-0.66883	Downregulated
Polr3h	polymerase (RNA) III (DNA directed) polypeptide H	78929	0.00741732	-0.669671	Downregulated
Phxr4	per-hexamer repeat gene 4	18689	0.0445736	-0.670341	Downregulated
Zscan26	zinc finger and SCAN domain containing 26	432731	0.0480047	-0.670487	Downregulated
Slc35b2	solute carrier family 35, member B2	73836	0.0273929	-0.67139	Downregulated
Pygo1	pygopus 1	72135	0.0454573	-0.671594	Downregulated
Pfkm	phosphofructokinase, muscle	18642	0.0321755	-0.672943	Downregulated
Ampd2	adenosine monophosphate deaminase 2	109674	0.0273929	-0.674113	Downregulated
Itpr2	inositol 1,4,5-triphosphate receptor 2	16439	0.0240598	-0.674818	Downregulated
Angptl2	angiopoietin-like 2	26360	0.0476967	-0.676466	Downregulated
Cdh2	cadherin 2	12558	0.0231972	-0.677258	Downregulated
Ldb3	LIM domain binding 3	24131	0.046752	-0.678682	Downregulated
Ccdc88a	coiled coil domain containing 88A	108686	0.0406203	-0.678962	Downregulated
Usp13	ubiquitin specific peptidase 13 (isopeptidase T-3)	72607	0.0417036	-0.681198	Downregulated
Pakap	paralemmin A kinase anchor protein	677884	0.0175908	-0.681558	Downregulated
Arl4a	ADP-ribosylation factor-like 4A	11861	0.0112235	-0.68252	Downregulated
Plekhg6	pleckstrin homology domain containing, family G (with RhoGef domain) member 6	213522	0.0300568	-0.682729	Downregulated
Angptl1	angiopoietin-like 1	72713	0.0224644	-0.683157	Downregulated
Hipk3	homeodomain interacting protein kinase 3	15259	0.0359652	-0.683521	Downregulated
Rreb1	ras responsive element binding protein 1	68750	0.0135044	-0.68729	Downregulated
Map7d3	MAP7 domain containing 3	320923	0.0246035	-0.689556	Downregulated
Inmt	indolethylamine N-methyltransferase	21743	0.0279152	-0.689762	Downregulated
Txlng	taxilin gamma	353170	0.0100955	-0.690484	Downregulated
Mtmr14	myotubularin related protein 14	97287	0.0244721	-0.691739	Downregulated
Ophn1	oligophrenin 1	94190	0.0145023	-0.692676	Downregulated
Pitpnc1	phosphatidylinositol transfer protein, cytoplasmic 1	71795	0.00531069	-0.692841	Downregulated
Arhgef40	Rho guanine nucleotide exchange factor (GEF) 40	268739	0.0167086	-0.693822	Downregulated
Fhod3	formin homology 2 domain containing 3	225288	0.00971194	-0.694135	Downregulated
Tmeff1	transmembrane protein with EGF-like and two follistatin-like domains 1	230157	0.044526	-0.694798	Downregulated
Gm16861	predicted gene, 16861	100503704	0.038479	-0.696374	Downregulated
Abra	actin-binding Rho activating protein	223513	0.0117	-0.699027	Downregulated
Ints6	integrator complex subunit 6	18130	0.00724099	-0.699062	Downregulated
Pcdhgc5	protocadherin gamma subfamily C, 5	93708	0.0113817	-0.6995	Downregulated
Apol6	apolipoprotein L 6	71939	0.0200069	-0.699519	Downregulated
Tle3	transducin-like enhancer of split 3	21887	0.00672457	-0.705136	Downregulated
Plpp5	phospholipid phosphatase 5	71910	0.00853775	-0.706255	Downregulated
Lhpp	phospholysine phosphohistidine inorganic pyrophosphate phosphatase	76429	0.0211548	-0.706456	Downregulated
Mpp3	membrane protein, palmitoylated 3 (MAGUK p55 subfamily member 3)	13384	0.0165398	-0.706594	Downregulated
Gimap3	GTPase, IMAP family member 3	83408	0.0490851	-0.707137	Downregulated
Dtna	dystrobrevin alpha	13527	0.0440478	-0.707879	Downregulated
Fgf14	fibroblast growth factor 14	14169	0.038296	-0.708274	Downregulated
Gfra1	glial cell line derived neurotrophic factor family receptor alpha 1	14585	0.0117608	-0.708515	Downregulated
Pxdn	peroxidasin	69675	0.0156161	-0.709324	Downregulated
Zfp512b	zinc finger protein 512B	269401	0.00526769	-0.709486	Downregulated
Btg2	BTG anti-proliferation factor 2	12227	0.0434177	-0.709607	Downregulated
Nkapl	NFKB activating protein-like	66707	0.0350976	-0.712465	Downregulated
Amotl2	angiomotin-like 2	56332	0.0260964	-0.713001	Downregulated
Rtn2	reticulon 2 (Z-band associated protein)	20167	0.0405606	-0.715085	Downregulated
Inca1	inhibitor of CDK, cyclin A1 interacting protein 1	103844	0.0174782	-0.715721	Downregulated
Fbxo36	F-box protein 36	66153	0.030623	-0.71814	Downregulated
Vsig10l	V-set and immunoglobulin domain containing 10 like	75690	0.0154902	-0.718367	Downregulated
Pcdhgc3	protocadherin gamma subfamily C, 3	93706	0.0392144	-0.718755	Downregulated
Steap2	six transmembrane epithelial antigen of prostate 2	74051	0.0185288	-0.719406	Downregulated
Timp4	tissue inhibitor of metalloproteinase 4	110595	0.0113675	-0.72023	Downregulated
Nlrc3	NLR family, CARD domain containing 3	268857	0.0245498	-0.722364	Downregulated
Lgals4	lectin, galactose binding, soluble 4	16855	0.0332028	-0.723801	Downregulated
Elmod2	ELMO/CED-12 domain containing 2	244548	0.0410198	-0.724015	Downregulated
Slc38a4	solute carrier family 38, member 4	69354	0.0271168	-0.727009	Downregulated
Epb41l1	erythrocyte membrane protein band 4.1 like 1	13821	0.0122693	-0.728081	Downregulated
Chst15	carbohydrate sulfotransferase 15	77590	0.0260771	-0.729491	Downregulated
Sema6c	sema domain, transmembrane domain (TM), and cytoplasmic domain, (semaphorin) 6C	20360	0.0282069	-0.730905	Downregulated
Jph1	junctophilin 1	57339	0.0409645	-0.732958	Downregulated
Obscn	obscurin, cytoskeletal calmodulin and titin-interacting RhoGEF	380698	0.0351774	-0.733291	Downregulated
Jarid2	jumonji, AT rich interactive domain 2	16468	0.00462492	-0.733376	Downregulated
Soga1	suppressor of glucose, autophagy associated 1	320706	0.0141148	-0.735528	Downregulated
Kdm6b	KDM1 lysine (K)-specific demethylase 6B	216850	0.0136108	-0.736557	Downregulated
Abca8a	ATP-binding cassette, sub-family A (ABC1), member 8a	217258	0.0247199	-0.737269	Downregulated
Aqp7	aquaporin 7	11832	0.0286743	-0.738554	Downregulated
Cfap54	cilia and flagella associated protein 54	380654	0.00250384	-0.738564	Downregulated
Lrg1	leucine-rich alpha-2-glycoprotein 1	76905	0.0117858	-0.740733	Downregulated
Col3a1	collagen, type III, alpha 1	12825	0.02408	-0.741611	Downregulated
Retnla	resistin like alpha	57262	0.0254875	-0.74309	Downregulated
Rad54l	RAD54 like (S. cerevisiae)	19366	0.00473107	-0.743162	Downregulated
Rps6ka5	ribosomal protein S6 kinase, polypeptide 5	73086	0.0126524	-0.746085	Downregulated
Tns2	tensin 2	209039	0.0270799	-0.746482	Downregulated
Pnrc1	proline-rich nuclear receptor coactivator 1	108767	0.0143367	-0.74675	Downregulated
Crispld2	cysteine-rich secretory protein LCCL domain containing 2	78892	0.0304485	-0.747152	Downregulated
Fus	fused in sarcoma	233908	0.0213937	-0.747629	Downregulated
Aldh6a1	aldehyde dehydrogenase family 6, subfamily A1	104776	0.00818606	-0.748802	Downregulated
Bhlhb9	basic helix-loop-helix domain containing, class B9	70237	0.0276062	-0.748837	Downregulated
Adipoq	adiponectin, C1Q and collagen domain containing	11450	0.0108828	-0.749052	Downregulated
Popdc2	popeye domain containing 2	64082	0.0108556	-0.750864	Downregulated
Fbl	fibrillarin	14113	0.0216568	-0.751579	Downregulated
Plekhg3	pleckstrin homology domain containing, family G (with RhoGef domain) member 3	263406	0.00781883	-0.753185	Downregulated
Sytl1	synaptotagmin-like 1	269589	0.0225267	-0.755708	Downregulated
Kansl1l	KAT8 regulatory NSL complex subunit 1-like	68691	0.0153033	-0.756856	Downregulated
Sec16b	SEC16 homolog B (S. cerevisiae)	89867	0.00574097	-0.757709	Downregulated
Acsm3	acyl-CoA synthetase medium-chain family member 3	20216	0.0240975	-0.761884	Downregulated
B2m	beta-2 microglobulin	12010	0.017073	-0.762872	Downregulated
Wnt11	wingless-type MMTV integration site family, member 11	22411	0.0115708	-0.76434	Downregulated
Tmem182	transmembrane protein 182	381339	0.024614	-0.765689	Downregulated
Snhg15	small nucleolar RNA host gene 15	100041286	0.00630626	-0.766024	Downregulated
Sprtn	SprT-like N-terminal domain	244666	0.00911241	-0.766089	Downregulated
Serpine2	serine (or cysteine) peptidase inhibitor, clade E, member 2	20720	0.00883248	-0.769056	Downregulated
Sesn2	sestrin 2	230784	0.022079	-0.770856	Downregulated
Gas2	growth arrest specific 2	14453	0.0176914	-0.771558	Downregulated
Shisa2	shisa family member 2	219134	0.0225958	-0.772589	Downregulated
Gstt1	glutathione S-transferase, theta 1	14871	0.0322021	-0.772625	Downregulated
Tmtc4	transmembrane and tetratricopeptide repeat containing 4	70551	0.00493436	-0.773257	Downregulated
Pcp4l1	Purkinje cell protein 4-like 1	66425	0.0404439	-0.775866	Downregulated
Pak1	p21 (RAC1) activated kinase 1	18479	0.0431934	-0.777003	Downregulated
Pygm	muscle glycogen phosphorylase	19309	0.0400009	-0.777036	Downregulated
Epb41l4a	erythrocyte membrane protein band 4.1 like 4a	13824	0.0364456	-0.778173	Downregulated
Retreg1	reticulophagy regulator 1	66270	0.0497653	-0.778907	Downregulated
Acta1	actin, alpha 1, skeletal muscle	11459	0.0454083	-0.781961	Downregulated
Klf4	Kruppel-like factor 4 (gut)	16600	0.015266	-0.782209	Downregulated
Nfe2l3	nuclear factor, erythroid derived 2, like 3	18025	0.0436004	-0.782789	Downregulated
Col4a5	collagen, type IV, alpha 5	12830	0.00842171	-0.783694	Downregulated
Hspa12a	heat shock protein 12A	73442	0.0193385	-0.784527	Downregulated
Cdkn2c	cyclin dependent kinase inhibitor 2C	12580	0.0121084	-0.786958	Downregulated
Usp2	ubiquitin specific peptidase 2	53376	0.0228428	-0.788245	Downregulated
Tmem45b	transmembrane protein 45b	235135	0.0287732	-0.788298	Downregulated
Ccnl1	cyclin L1	56706	0.0127417	-0.78998	Downregulated
Dusp8	dual specificity phosphatase 8	18218	0.0362945	-0.790731	Downregulated
Ddah1	dimethylarginine dimethylaminohydrolase 1	69219	0.0216299	-0.793127	Downregulated
Ccl11	chemokine (C-C motif) ligand 11	20292	0.012837	-0.794976	Downregulated
Plaat3	phospholipase A and acyltransferase 3	225845	0.00391966	-0.795096	Downregulated
Gramd1b	GRAM domain containing 1B	235283	0.0306472	-0.798027	Downregulated
Dcn	decorin	13179	0.0337272	-0.801602	Downregulated
Adcy5	adenylate cyclase 5	224129	0.0475431	-0.803739	Downregulated
Mafb	v-maf musculoaponeurotic fibrosarcoma oncogene family, protein B (avian)	16658	0.0109792	-0.803837	Downregulated
Pappa	pregnancy-associated plasma protein A	18491	0.0254437	-0.805713	Downregulated
Prkcq	protein kinase C, theta	18761	0.0286178	-0.807277	Downregulated
Fxyd6	FXYD domain-containing ion transport regulator 6	59095	0.0383651	-0.807609	Downregulated
Itpka	inositol 1,4,5-trisphosphate 3-kinase A	228550	0.0210549	-0.808876	Downregulated
G0s2	G0/G1 switch gene 2	14373	0.0336035	-0.811724	Downregulated
Ralgds	ral guanine nucleotide dissociation stimulator	19730	0.0337862	-0.811833	Downregulated
Kcna2	potassium voltage-gated channel, shaker-related subfamily, member 2	16490	0.0154083	-0.814739	Downregulated
Rpl3l	ribosomal protein L3-like	66211	0.042734	-0.81488	Downregulated
Hes1	hes family bHLH transcription factor 1	15205	0.00232809	-0.815439	Downregulated
Ramp1	receptor (calcitonin) activity modifying protein 1	51801	0.0381837	-0.815826	Downregulated
Asb2	ankyrin repeat and SOCS box-containing 2	65256	0.0272413	-0.816827	Downregulated
Zfp592	zinc finger protein 592	233410	0.0134444	-0.817572	Downregulated
Adcy9	adenylate cyclase 9	11515	0.015516	-0.817839	Downregulated
Myom2	myomesin 2	17930	0.0317476	-0.818397	Downregulated
Tef	thyrotroph embryonic factor	21685	0.00814382	-0.819346	Downregulated
Pde4dip	phosphodiesterase 4D interacting protein (myomegalin)	83679	0.0139764	-0.822137	Downregulated
Egfr	epidermal growth factor receptor	13649	0.0236937	-0.823003	Downregulated
Pcdhgc4	protocadherin gamma subfamily C, 4	93707	0.0202377	-0.825221	Downregulated
Nkain1	Na+/K+ transporting ATPase interacting 1	67149	0.027086	-0.82685	Downregulated
Ier2	immediate early response 2	15936	0.0482654	-0.829838	Downregulated
Hmgcs2	3-hydroxy-3-methylglutaryl-Coenzyme A synthase 2	15360	0.0130165	-0.83786	Downregulated
Cst7	cystatin F (leukocystatin)	13011	0.00953733	-0.83874	Downregulated
Esyt1	extended synaptotagmin-like protein 1	23943	0.0287062	-0.84155	Downregulated
Tcea3	transcription elongation factor A (SII), 3	21401	0.0283967	-0.842421	Downregulated
Met	met proto-oncogene	17295	0.0115109	-0.846624	Downregulated
Slc38a3	solute carrier family 38, member 3	76257	0.0333398	-0.850077	Downregulated
Gfra4	glial cell line derived neurotrophic factor family receptor alpha 4	14588	0.0461128	-0.852212	Downregulated
4632427E13Rik	RIKEN cDNA 4632427E13 gene	666737	0.0359284	-0.852503	Downregulated
Pid1	phosphotyrosine interaction domain containing 1	98496	0.00953523	-0.856938	Downregulated
Etv3	ets variant 3	27049	0.00282846	-0.858665	Downregulated
Naaa	N-acylethanolamine acid amidase	67111	0.0163219	-0.859529	Downregulated
Ackr4	atypical chemokine receptor 4	252837	0.0122007	-0.86317	Downregulated
Txnip	thioredoxin interacting protein	56338	0.0176605	-0.869826	Downregulated
Bmper	BMP-binding endothelial regulator	73230	0.0156925	-0.869891	Downregulated
Mgst3	microsomal glutathione S-transferase 3	66447	0.00678085	-0.871787	Downregulated
Padi2	peptidyl arginine deiminase, type II	18600	0.0197843	-0.874145	Downregulated
Atp2a1	ATPase, Ca++ transporting, cardiac muscle, fast twitch 1	11937	0.0238065	-0.87467	Downregulated
Per1	period circadian clock 1	18626	0.0373833	-0.8806	Downregulated
Tmem38a	transmembrane protein 38A	74166	0.0388423	-0.881105	Downregulated
Tacc2	transforming, acidic coiled-coil containing protein 2	57752	0.0103358	-0.883054	Downregulated
Aox3	aldehyde oxidase 3	71724	0.0272143	-0.887862	Downregulated
Sptb	spectrin beta, erythrocytic	20741	0.018802	-0.890289	Downregulated
Slc1a3	solute carrier family 1 (glial high affinity glutamate transporter), member 3	20512	0.0328697	-0.892084	Downregulated
Erbb4	erb-b2 receptor tyrosine kinase 4	13869	0.0048835	-0.895446	Downregulated
Smyd1	SET and MYND domain containing 1	12180	0.0179251	-0.896265	Downregulated
Agmo	alkylglycerol monooxygenase	319660	0.00394882	-0.896692	Downregulated
Trarg1	trafficking regulator of GLUT4 (SLC2A4) 1	237858	0.00617241	-0.899554	Downregulated
Garre1	granule associated Rac and RHOG effector 1	233103	0.00699297	-0.900091	Downregulated
Cxcl9	chemokine (C-X-C motif) ligand 9	17329	0.00651021	-0.900748	Downregulated
Abcd2	ATP-binding cassette, sub-family D (ALD), member 2	26874	0.00756115	-0.901023	Downregulated
Myom1	myomesin 1	17929	0.0178039	-0.907355	Downregulated
Il17re	interleukin 17 receptor E	57890	0.0175176	-0.910226	Downregulated
Ryr1	ryanodine receptor 1, skeletal muscle	20190	0.0206185	-0.910262	Downregulated
Slc5a6	solute carrier family 5 (sodium-dependent vitamin transporter), member 6	330064	0.0294083	-0.913929	Downregulated
Mir365-2	microRNA 365-2	723853	0.00585965	-0.916201	Downregulated
Svopl	SV2 related protein homolog (rat)-like	320590	0.000762802	-0.916512	Downregulated
Ppp1r15a	protein phosphatase 1, regulatory subunit 15A	17872	0.0166417	-0.92178	Downregulated
Id1	inhibitor of DNA binding 1, HLH protein	15901	0.0172829	-0.923679	Downregulated
Cd274	CD274 antigen	60533	0.0133237	-0.92968	Downregulated
Bcl6	B cell leukemia/lymphoma 6	12053	0.00906903	-0.932959	Downregulated
Cebpa	CCAAT/enhancer binding protein (C/EBP), alpha	12606	0.0066482	-0.936021	Downregulated
Junb	jun B proto-oncogene	16477	0.0236826	-0.936308	Downregulated
Enpp2	ectonucleotide pyrophosphatase/phosphodiesterase 2	18606	0.00369774	-0.937325	Downregulated
Angptl4	angiopoietin-like 4	57875	0.00614184	-0.937449	Downregulated
Dkk2	dickkopf WNT signaling pathway inhibitor 2	56811	0.0184335	-0.938521	Downregulated
Sctr	secretin receptor	319229	0.00744299	-0.940081	Downregulated
Nr1d2	nuclear receptor subfamily 1, group D, member 2	353187	0.0120169	-0.943758	Downregulated
Tpm3	tropomyosin 3, gamma	59069	0.0343593	-0.947001	Downregulated
Cenpo	centromere protein O	52504	0.0131722	-0.9484	Downregulated
Nrp2	neuropilin 2	18187	0.0119028	-0.950211	Downregulated
Celsr2	cadherin, EGF LAG seven-pass G-type receptor 2	53883	0.0166787	-0.952137	Downregulated
Sema4b	sema domain, immunoglobulin domain (Ig), transmembrane domain (TM) and short cytoplasmic domain, (semaphorin) 4B	20352	0.0175337	-0.954885	Downregulated
Homer2	homer scaffolding protein 2	26557	0.0323854	-0.955257	Downregulated
Gpat3	glycerol-3-phosphate acyltransferase 3	231510	0.0261561	-0.958464	Downregulated
Gm10400	predicted gene 10400	100093700	0.00317945	-0.959219	Downregulated
Wdr6	WD repeat domain 6	83669	0.0370376	-0.96342	Downregulated
Myh4	myosin, heavy polypeptide 4, skeletal muscle	17884	0.0223373	-0.967076	Downregulated
Alpk3	alpha-kinase 3	116904	0.0364239	-0.96933	Downregulated
Prkag2	protein kinase, AMP-activated, gamma 2 non-catalytic subunit	108099	0.00172637	-0.975258	Downregulated
Fam20c	family with sequence similarity 20, member C	80752	0.00613057	-0.981576	Downregulated
Tpm2	tropomyosin 2, beta	22004	0.0234052	-0.985963	Downregulated
Klf11	Kruppel-like factor 11	194655	0.0112268	-0.986106	Downregulated
Atoh8	atonal bHLH transcription factor 8	71093	0.0137027	-0.992513	Downregulated
Zfp185	zinc finger protein 185	22673	0.0176573	-0.992677	Downregulated
Glb1l2	galactosidase, beta 1-like 2	244757	0.00552996	-0.994567	Downregulated
Acat3	acetyl-Coenzyme A acetyltransferase 3	224530	0.0147275	-0.99537	Downregulated
Tob2	transducer of ERBB2, 2	57259	0.0011372	-0.995876	Downregulated
Neb	nebulin	17996	0.0184562	-0.997106	Downregulated
Atl2	atlastin GTPase 2	56298	0.00890329	-0.998965	Downregulated
Rab11fip4	RAB11 family interacting protein 4 (class II)	268451	0.00848336	-1.00009	Downregulated
Cmya5	cardiomyopathy associated 5	76469	0.0207543	-1.00227	Downregulated
Cdh23	cadherin 23 (otocadherin)	22295	0.0105558	-1.00933	Downregulated
Kcnj2	potassium inwardly-rectifying channel, subfamily J, member 2	16518	0.0159817	-1.01473	Downregulated
Zbed5	zinc finger, BED type containing 5	71970	0.00073311	-1.01482	Downregulated
Sik1	salt inducible kinase 1	17691	0.0415037	-1.01641	Downregulated
Col23a1	collagen, type XXIII, alpha 1	237759	0.00652911	-1.02796	Downregulated
Dmd	dystrophin, muscular dystrophy	13405	0.0262855	-1.03172	Downregulated
Pim3	proviral integration site 3	223775	0.0146382	-1.03382	Downregulated
Slc25a42	solute carrier family 25, member 42	73095	0.00387345	-1.03659	Downregulated
4931428L18Rik	RIKEN cDNA 4931428L18 gene	70988	0.0110694	-1.0448	Downregulated
Gm30122	predicted gene, 30122	102631905	0.0186327	-1.04864	Downregulated
Gng7	guanine nucleotide binding protein (G protein), gamma 7	14708	0.0180083	-1.05004	Downregulated
Plin4	perilipin 4	57435	0.00930634	-1.05037	Downregulated
Tdo2	tryptophan 2,3-dioxygenase	56720	0.00513999	-1.05554	Downregulated
Per3	period circadian clock 3	18628	0.00387119	-1.06332	Downregulated
Ppara	peroxisome proliferator activated receptor alpha	19013	0.0163775	-1.06685	Downregulated
Slc25a25	solute carrier family 25 (mitochondrial carrier, phosphate carrier), member 25	227731	0.0116021	-1.0685	Downregulated
Net1	neuroepithelial cell transforming gene 1	56349	0.041905	-1.07021	Downregulated
Klf2	Kruppel-like factor 2 (lung)	16598	0.0124846	-1.07116	Downregulated
Jun	jun proto-oncogene	16476	0.0156248	-1.07596	Downregulated
Gm17971	ribosomal protein S2 pseudogene	100416214	0.0156268	-1.09797	Downregulated
Apoe	apolipoprotein E	11816	0.00371911	-1.10245	Downregulated
Nr4a2	nuclear receptor subfamily 4, group A, member 2	18227	0.00350558	-1.10637	Downregulated
Col6a6	collagen, type VI, alpha 6	245026	0.0100254	-1.11023	Downregulated
Anxa8	annexin A8	11752	0.0260844	-1.11341	Downregulated
Gpx3	glutathione peroxidase 3	14778	0.00251257	-1.12467	Downregulated
Fbxo21	F-box protein 21	231670	0.0093298	-1.1327	Downregulated
Peg3	paternally expressed 3	18616	0.0138207	-1.13895	Downregulated
Sncg	synuclein, gamma	20618	0.0401059	-1.14364	Downregulated
Pfkfb3	6-phosphofructo-2-kinase/fructose-2,6-biphosphatase 3	170768	0.00763601	-1.1478	Downregulated
Strip2	striatin interacting protein 2	320609	0.0104737	-1.15219	Downregulated
Cfd	complement factor D (adipsin)	11537	0.00295853	-1.15702	Downregulated
Dlgap1	DLG associated protein 1	224997	0.00555214	-1.16889	Downregulated
Pmepa1	prostate transmembrane protein, androgen induced 1	65112	0.00874772	-1.17289	Downregulated
Hcar1	hydrocarboxylic acid receptor 1	243270	0.0106221	-1.18268	Downregulated
Asb11	ankyrin repeat and SOCS box-containing 11	68854	0.00611705	-1.18487	Downregulated
Ttn	titin	22138	0.0150456	-1.18763	Downregulated
Hic2	hypermethylated in cancer 2	58180	0.00979201	-1.18815	Downregulated
Pcsk5	proprotein convertase subtilisin/kexin type 5	18552	0.0128204	-1.18879	Downregulated
Angpt1	angiopoietin 1	11600	0.0195283	-1.19157	Downregulated
Trib1	tribbles pseudokinase 1	211770	0.0174503	-1.20009	Downregulated
Enc1	ectodermal-neural cortex 1	13803	0.00472661	-1.20843	Downregulated
Smad6	SMAD family member 6	17130	0.00425543	-1.21456	Downregulated
Dusp10	dual specificity phosphatase 10	63953	0.00218528	-1.2203	Downregulated
Gnas	GNAS (guanine nucleotide binding protein, alpha stimulating) complex locus	14683	0.000130968	-1.22194	Downregulated
Art3	ADP-ribosyltransferase 3	109979	0.000582429	-1.224	Downregulated
Ppp1r10	protein phosphatase 1, regulatory subunit 10	52040	0.00405245	-1.22566	Downregulated
Dusp1	dual specificity phosphatase 1	19252	0.00425464	-1.22966	Downregulated
Noct	nocturnin	12457	0.0111902	-1.23396	Downregulated
F3	coagulation factor III	14066	0.00479093	-1.2553	Downregulated
Cntfr	ciliary neurotrophic factor receptor	12804	0.0255186	-1.28857	Downregulated
Impdh1	inosine monophosphate dehydrogenase 1	23917	0.00462916	-1.30479	Downregulated
Tnc	tenascin C	21923	0.0106668	-1.30775	Downregulated
B3galt2	UDP-Gal:betaGlcNAc beta 1,3-galactosyltransferase, polypeptide 2	26878	0.000924206	-1.31201	Downregulated
Gm6878	predicted gene 6878	628416	0.00884193	-1.31719	Downregulated
Slc15a2	solute carrier family 15 (H+/peptide transporter), member 2	57738	0.0133375	-1.3317	Downregulated
Col12a1	collagen, type XII, alpha 1	12816	0.01087	-1.33886	Downregulated
Pkia	protein kinase inhibitor, alpha	18767	0.0381522	-1.36226	Downregulated
Pck1	phosphoenolpyruvate carboxykinase 1, cytosolic	18534	0.0161455	-1.38586	Downregulated
Hp	haptoglobin	15439	0.000148379	-1.38763	Downregulated
Mcam	melanoma cell adhesion molecule	84004	0.00214061	-1.38836	Downregulated
Gadd45g	growth arrest and DNA-damage-inducible 45 gamma	23882	0.00943756	-1.44287	Downregulated
Ivns1abp	influenza virus NS1A binding protein	117198	0.000269655	-1.48859	Downregulated
Aqp1	aquaporin 1	11826	0.00109639	-1.52951	Downregulated
Tfrc	transferrin receptor	22042	0.00540187	-1.53276	Downregulated
Cdsn	corneodesmosin	386463	0.0112214	-1.54555	Downregulated
Slc16a7	solute carrier family 16 (monocarboxylic acid transporters), member 7	20503	0.00226747	-1.55962	Downregulated
Lctl	lactase-like	235435	0.00410811	-1.60255	Downregulated
Btc	betacellulin, epidermal growth factor family member	12223	0.000646154	-1.69069	Downregulated
Adamtsl3	ADAMTS-like 3	269959	0.00134356	-1.71084	Downregulated
Dbp	D site albumin promoter binding protein	13170	0.00349564	-1.8226	Downregulated
Vat1l	vesicle amine transport protein 1 like	270097	0.000219848	-1.84295	Downregulated
Pon1	paraoxonase 1	18979	8.29627e-05	-1.87322	Downregulated
Nnat	neuronatin	18111	0.00419279	-1.88397	Downregulated
Rasd1	RAS, dexamethasone-induced 1	19416	0.000651681	-1.92422	Downregulated
Svep1	sushi, von Willebrand factor type A, EGF and pentraxin domain containing 1	64817	0.00276961	-1.97741	Downregulated
Nr4a1	nuclear receptor subfamily 4, group A, member 1	15370	0.00137282	-2.23178	Downregulated
Nr4a3	nuclear receptor subfamily 4, group A, member 3	18124	0.000514404	-2.29236	Downregulated
Irs2	insulin receptor substrate 2	384783	0.00245908	-2.3695	Downregulated
Car3	carbonic anhydrase 3	12350	0.000173626	-2.53389	Downregulated
Apob	apolipoprotein B	238055	9.94264e-05	-2.71077	Downregulated
Serpina3k	serine (or cysteine) peptidase inhibitor, clade A, member 3K	20714	0.00148253	-2.76329	Downregulated
Alb	albumin	11657	7.94455e-06	-4.68003	Downregulated
